# Supplementary material
Source: PubMed Central journal article supplement (PMC5942873)
Supplement: ja8b02399_si_001.pdf [file ja8b02399_si_001.pdf]

## Supporting Information: Gluco-1*H*-imidazole: a new class of azole-type $\beta$ - glucosidase inhibitor

Sybrin P. Schröder,<sup>†</sup> Liang Wu,<sup>§</sup> Marta Artola,<sup>†</sup> Thomas Hansen,<sup>†</sup> Wendy A. Offen,<sup>§</sup> Maria J. Ferraz,<sup>‡</sup> Kah-Yee Li,<sup>†</sup> Johannes M. F. G. Aerts,<sup>‡</sup> Gijsbert A. van der Marel,<sup>†</sup> Jeroen D. C. Codée,<sup>†</sup> Gideon J. Davies<sup>§</sup> and Herman S. Overkleeft<sup>†\*</sup>

<sup>†</sup> Department of Bioorganic Synthesis and <sup>‡</sup>Department of Medical Biochemistry, Leiden Institute of Chemistry, Einsteinweg 55, 2333 CC Leiden, The Netherlands.

<sup>§</sup> Department of Chemistry, York Structural Biology Laboratory, University of York, Heslington, York, YO10 5DD, U.K.

\*Corresponding author

E-mail: [h.s.overkleeft@chem.leidenuniv.nl](mailto:h.s.overkleeft@chem.leidenuniv.nl)

### Table of Contents

|                                                                                        |    |
|----------------------------------------------------------------------------------------|----|
| Experimental procedures and characterization data .....                                | 2  |
| <sup>1</sup> H- and <sup>13</sup> C-NMR spectra .....                                  | 13 |
| p <i>K</i> <sub>AH</sub> determination .....                                           | 37 |
| Determination of kinetic constant ( <i>K</i> <sub>i</sub> ) values .....               | 39 |
| Protein expression and crystallography .....                                           | 41 |
| Electron density and B-factor comparisons for complexes of <b>5</b> and <b>6</b> ..... | 43 |
| ITC.....                                                                               | 44 |
| DFT calculations.....                                                                  | 47 |
| References.....                                                                        | 63 |

## Experimental procedures and characterization data

**General:** Chemicals were purchased from Acros, Sigma Aldrich, Biosolve, VWR, Fluka, Merck and Fisher Scientific and used as received unless stated otherwise. Tetrahydrofuran (THF), *N,N*-dimethylformamide (DMF) and toluene were stored over molecular sieves before use. Traces of water from reagents were removed by co-evaporation with toluene in reactions that required anhydrous conditions. All reactions were performed under an argon atmosphere unless stated otherwise. TLC analysis was conducted using Merck aluminum sheets (Silica gel 60 F<sub>254</sub>) with detection by UV absorption (254 nm), by spraying with a solution of (NH<sub>4</sub>)<sub>6</sub>Mo<sub>7</sub>O<sub>24</sub>·4H<sub>2</sub>O (25 g/L) and (NH<sub>4</sub>)<sub>4</sub>Ce(SO<sub>4</sub>)<sub>4</sub>·2H<sub>2</sub>O (10 g/L) in 10% sulfuric acid or a solution of KMnO<sub>4</sub> (20 g/L) and K<sub>2</sub>CO<sub>3</sub> (10 g/L) in water, followed by charring at ~150 °C. Column chromatography was performed using Screening Device b.v. silica gel (particle size of 40 – 63  $\mu$ m, pore diameter of 60 Å) with the indicated eluents. <sup>1</sup>H NMR and <sup>13</sup>C NMR spectra were recorded on a Brüker AV-400 (400 and 101 MHz respectively) or a Brüker AV-500 (500 and 125 MHz respectively) spectrometer in the given deuterated solvent. Chemical shifts are given in ppm ( $\delta$ ) relative to the residual solvent peak or tetramethylsilane (0 ppm) as internal standard. Coupling constants are given in Hz. High-resolution mass spectrometry (HRMS) analysis was performed with a LTQ Orbitrap mass spectrometer (Thermo Finnigan), equipped with an electrospray ion source in positive mode (source voltage 3.5 kV, sheath gas flow 10 mL/min, capillary temperature 250 °C) with resolution R = 60000 at m/z 400 (mass range m/z = 150 – 2000) and dioctyl phthalate (m/z = 391.28428) as a “lock mass”, or with a Synapt G2-Si (Waters), equipped with an electrospray ion source in positive mode (ESI-TOF), injection via NanoEquity system (Waters), with LeuEnk (m/z = 556.2771) as “lock mass”. Eluents used: MeCN:H<sub>2</sub>O (1:1 v/v) supplemented with 0.1% formic acid. The high-resolution mass spectrometers were calibrated prior to measurements with a calibration mixture (Thermo Finnigan). Glucoimidazole **5** was prepared according to the procedure by Vasella *et al.*<sup>[1]</sup> NMR spectra of this compound are provided herein and are in agreement with those previously reported.

Synthesis of gluco-1*H*-imidazoles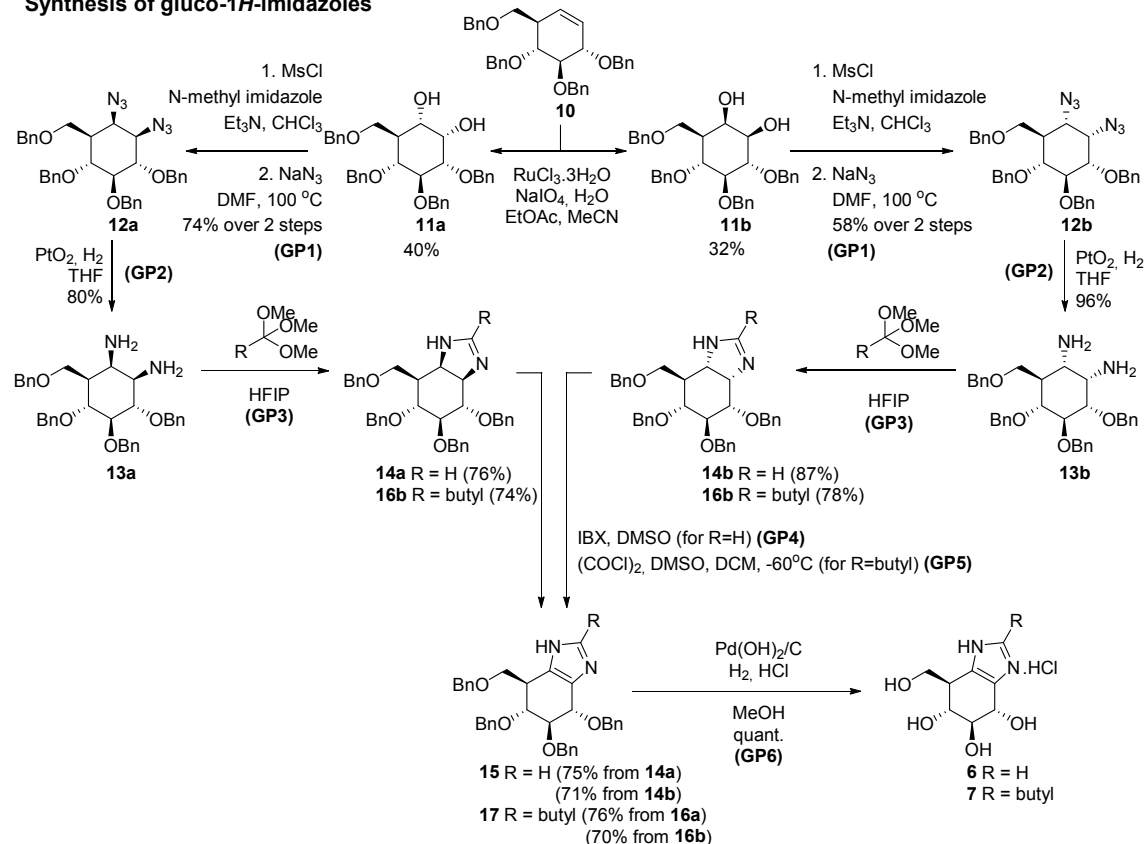

## General procedure 1 (GP1): Bis-azidation

The diol starting material was dissolved in dry CHCl<sub>3</sub> (0.2 M), then Et<sub>3</sub>N (3 equiv.) and *N*-methyl imidazole (10 equiv.) were added and the mixture was cooled to 0 °C. MsCl (4 equiv.) was added and the mixture was stirred 16 h at rt. The mixture was quenched with water at 0 °C, diluted with EtOAc, washed with aq. 1M HCl (2 x), H<sub>2</sub>O and brine. The organic layer was dried over MgSO<sub>4</sub>, filtered and concentrated. After co-evaporation with toluene (2 x), the crude intermediate product was dissolved in dry DMF (0.1 M). NaN<sub>3</sub> (10 equiv.) was added and the mixture was stirred 16 h at 100 °C. Then, the mixture was diluted with H<sub>2</sub>O and extracted with Et<sub>2</sub>O (3 x). The combined organic layers were washed with H<sub>2</sub>O and brine, dried over MgSO<sub>4</sub>, filtered and concentrated. The product was purified by flash column chromatography using the indicated eluent.

## General procedure 2 (GP2): Azide reduction

The bisazido starting material was dissolved in THF (0.05 M) under N<sub>2</sub> atmosphere. PtO<sub>2</sub> (30 mol%) was added, the reaction mixture was purged with H<sub>2</sub> with a balloon, and the mixture was stirred

vigorously for 16 h. Then, the mixture was filtered over a small Celite pad and concentrated. The product was purified by flash column chromatography using the indicated eluent.

#### **General procedure 3 (GP3): Imidazoline formation**

The diamino starting material was dissolved in HFIP (0.1 M), the appropriate trimethyl orthoester (3 equiv.) was added and the mixture was stirred for 16 h at rt. The mixture was diluted with Et<sub>2</sub>O and washed with aq. 1M NaOH (3 x), H<sub>2</sub>O and brine, dried over MgSO<sub>4</sub>, filtered and concentrated. The product was purified by flash column chromatography using the indicated eluent.

*It should be noted that for both glucose and conduritol configurations, oxidation of the 2-butyl-imidazolines to the 2-butyl-imidazoles proceeded in only moderate yields when IBX/DMSO was employed. In contrast, we found that oxidation proceeded more smoothly under Swern conditions.<sup>[2,3]</sup>*

#### **General procedure 4 (GP4): Oxidation to the imidazole (IBX, DMSO)**

The imidazoline starting material was dissolved in DMSO (0.1 M), IBX<sup>[4]</sup> (1.5 equiv.) was added and the mixture was stirred 16 h at 45 °C. Next, the mixture was cooled to rt, quenched with aq. 10% Na<sub>2</sub>S<sub>2</sub>O<sub>3</sub> and aq. 1M NaOH. The mixture was stirred for 15 min, diluted with Et<sub>2</sub>O, washed with H<sub>2</sub>O (3 x) and brine, dried over MgSO<sub>4</sub>, filtered and concentrated. The product was purified by flash column chromatography using the indicated eluent.

#### **General procedure 5 (GP5): Oxidation to the imidazole (Swern conditions)**

To dry DCM (0.1 M based on starting material) was added DMSO (7 equiv.) and the mixture was cooled to -60 °C. Then, oxalyl chloride (5 equiv.) was added slowly and the mixture was stirred for 30 min. The imidazoline starting material was co-evaporated with toluene (2 x), dissolved in dry DCM (1 mL) and added dropwise. The mixture was stirred for 1 h at -60 °C and subsequently quenched with Et<sub>3</sub>N (7 equiv.). The cooling bath was removed and the mixture was allowed to reach rt. After stirring 1 h at rt, the mixture was diluted with EtOAc, washed with H<sub>2</sub>O (3 x) and brine. The organic layer was dried with MgSO<sub>4</sub>, filtered and concentrated. The product was purified by flash column chromatography using the indicated eluent.

#### **General procedure 6 (GP6): Hydrogenation**

The imidazole starting material was dissolved in MeOH (0.03 M) under N<sub>2</sub> atmosphere, then HCl (1.25M in MeOH, 10 equiv.) and Pd(OH)<sub>2</sub>/C (20 wt%) were added and the mixture was purged with H<sub>2</sub> with a balloon. The mixture was stirred vigorously for 16 h, filtered over a small Celite pad and finally concentrated which afforded the pure product.

**Compound 11b and compound 11a**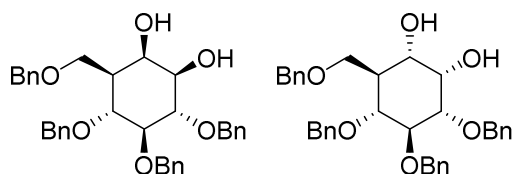

Cyclohexene **10**<sup>[5]</sup> (1.28 g, 2.46 mmol) was dissolved in EtOAc (15 mL) and MeCN (15 mL) and cooled to 0 °C. A solution of RuCl<sub>3</sub>·3H<sub>2</sub>O (36 mg, 0.17 mmol) and NaIO<sub>4</sub> (789 mg, 3.69 mmol) in H<sub>2</sub>O (4.9 mL) was added and the mixture was stirred vigorously at 0 °C for 90 min. The mixture was quenched by addition of aq. 10% Na<sub>2</sub>S<sub>2</sub>O<sub>3</sub> (20 mL) and the mixture was stirred for 15 min. Then the mixture was diluted with H<sub>2</sub>O (100 mL) and extracted with EtOAc (3 x 60 mL). The combined organic layers were washed with brine, dried over MgSO<sub>4</sub>, filtrated and concentrated. The product was purified by flash column chromatography (pentane/EtOAc, 4:1 → 2:1) affording compound **11b** (432 mg, 32%) and **11a** (539 mg, 40%) as white solids. *Analytical data for 11b*: <sup>1</sup>H-NMR (400 MHz, CDCl<sub>3</sub>)  $\delta$  7.69 – 6.77 (m, 20H), 5.00 – 4.85 (m, 4H), 4.79 (d, *J* = 11.1 Hz, 1H), 4.59 – 4.39 (m, 3H), 4.25 (s, 1H), 3.89 (m, 3H), 3.73 (dd, *J* = 8.9, 2.9 Hz, 1H), 3.61 – 3.45 (m, 2H), 3.34 (s, OH), 2.41 (d, *J* = 4.8 Hz, OH), 1.74 (dq, *J* = 8.0, 2.3 Hz, 1H). <sup>13</sup>C-NMR (101 MHz, CDCl<sub>3</sub>)  $\delta$  138.7, 138.7, 138.4, 137.6, 128.7, 128.7, 128.6, 128.6, 128.1, 128.1, 127.9, 127.9, 127.9, 127.8, 127.7, 86.7, 82.4, 77.4, 75.8, 75.7, 75.6, 74.6, 73.7, 71.0, 68.9, 43.5. IR (neat, cm<sup>-1</sup>):  $\nu$  3441, 2866, 1452, 1058. HRMS (ESI) *m/z*: [M+H]<sup>+</sup> calc for C<sub>35</sub>H<sub>39</sub>O<sub>6</sub> 555.27412, found 555.27411. *Analytical data for 11a*: <sup>1</sup>H-NMR (400 MHz, CDCl<sub>3</sub>)  $\delta$  7.38 – 7.15 (m, 20H), 4.94 (d, *J* = 10.8 Hz, 1H), 4.87 (d, *J* = 10.8 Hz, 1H), 4.82 (d, *J* = 10.8 Hz, 1H), 4.71 (s, 2H), 4.55 – 4.38 (m, 3H), 4.14 (s, 1H), 3.96 (t, *J* = 9.4 Hz, 1H), 3.84 (dd, *J* = 9.0, 2.5 Hz, 1H), 3.68 – 3.65 (m, 2H), 3.46 – 3.30 (m, 2H), 3.05 (d, *J* = 6.2 Hz, OH), 2.62 (s, OH), 2.18 (tdd, *J* = 10.9, 5.0, 2.5 Hz, 1H). <sup>13</sup>C-NMR (101 MHz, CDCl<sub>3</sub>)  $\delta$  138.8, 138.5, 138.0, 138.0, 128.5, 128.5, 128.4, 128.4, 128.0, 128.0, 127.9, 127.7, 127.7, 127.7, 127.6, 82.9, 80.0, 77.7, 75.7, 75.3, 73.3, 72.5, 70.3, 69.3, 67.7, 43.2. IR (neat, cm<sup>-1</sup>):  $\nu$  3441, 2868, 1452, 1064. HRMS (ESI) *m/z*: [M+H]<sup>+</sup> calc for C<sub>35</sub>H<sub>39</sub>O<sub>6</sub> 555.27412, found 555.27374. These data are in agreement with those previously reported.<sup>[6]</sup>

**Compound 12a**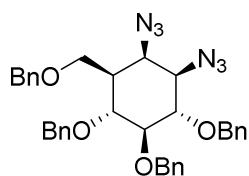

Starting from **11a** (55 mg, 0.1 mmol) and following **GP1**, the product was purified by flash column chromatography (pentane/EtOAc, 15:1) affording compound **12a** as a white solid (45 mg, 74%). <sup>1</sup>H-NMR (400 MHz, CDCl<sub>3</sub>)  $\delta$  7.44 – 7.11 (m, 20H), 4.96 – 4.74 (m, 5H), 4.55 – 4.37 (m, 3H), 4.16 (t, *J* = 2.9 Hz, 1H), 3.86 – 3.75 (t, *J* = 9.6 Hz, 1H), 3.73 (dd, *J* = 8.9, 4.3 Hz, 1H), 3.58 – 3.49 (m, 2H), 3.49 – 3.41 (m, 1H), 3.38 (dd, *J* = 10.2, 9.2 Hz, 1H), 2.08 – 1.95 (m, 1H). <sup>13</sup>C-NMR (101 MHz, CDCl<sub>3</sub>)  $\delta$  138.4, 137.9, 137.8, 137.8, 128.6, 128.6, 128.6, 128.4, 128.2, 128.1, 128.1, 128.0, 127.8, 127.6, 87.0, 81.1, 78.0, 76.1, 75.9, 75.6, 73.6, 67.5, 65.9, 61.1, 43.8. IR (neat, cm<sup>-1</sup>):  $\nu$  2858, 2102, 1359, 1066. HRMS (ESI) *m/z*: [M+Na]<sup>+</sup> calc for C<sub>35</sub>H<sub>37</sub>N<sub>6</sub>O<sub>4</sub> 605.28708, found 605.33734.

**Compound 12b**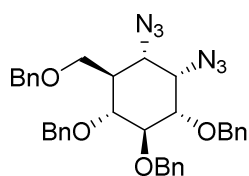

Starting from **11b** (55 mg, 0.1 mmol) and following **GP1**, the product was purified by flash column chromatography (pentane/EtOAc, 15:1) affording compound **12b** as a white solid (35 mg, 58%).  $^1\text{H-NMR}$  (400 MHz,  $\text{CDCl}_3$ )  $\delta$  7.39 – 7.13 (m, 20H), 4.95 – 4.67 (m, 5H), 4.48 (d,  $J = 4.3$  Hz, 1H), 4.45 (d,  $J = 3.5$  Hz, 1H), 4.34 (d,  $J = 11.5$  Hz, 1H), 4.05 (t,  $J = 2.9$  Hz, 1H), 3.86 (t,  $J = 9.5$  Hz, 1H), 3.82 (d,  $J = 9.2$  Hz, 1H), 3.56 (ddd,  $J = 9.6, 6.5, 4.1$  Hz, 2H), 3.51 (dd,  $J = 10.6, 2.4$  Hz, 2H), 2.02 (t,  $J = 11.2$  Hz, 1H).  $^{13}\text{C-NMR}$  (101 MHz,  $\text{CDCl}_3$ )  $\delta$  138.6, 138.4, 138.0, 137.6, 128.7, 128.5, 128.2, 128.1, 128.1, 127.9, 127.8, 127.8, 83.1, 80.4, 77.7, 76.0, 75.7, 73.3, 73.3, 65.0, 63.7, 57.7, 42.5. IR (neat,  $\text{cm}^{-1}$ ):  $\nu$  2858, 2098, 1359, 1082. HRMS (ESI)  $m/z$ :  $[\text{M}+\text{Na}]^+$  calc for  $\text{C}_{35}\text{H}_{36}\text{N}_6\text{O}_4\text{Na}$  627.26902, found 627.26849.

**Compound 13a**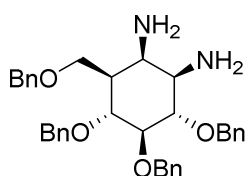

Starting from **12a** (367 mg, 0.61 mmol) and following **GP2**, the product was purified by flash column chromatography (DCM/MeOH, 99:1  $\rightarrow$  49:1) affording compound **13a** as a colorless oil (269 mg, 80%).  $^1\text{H-NMR}$  (400 MHz,  $\text{CDCl}_3$ )  $\delta$  7.42 – 7.11 (m, 20H), 4.99 (d,  $J = 11.1$  Hz, 1H), 4.96 – 4.83 (m, 3H), 4.66 (d,  $J = 11.1$  Hz, 1H), 4.55 – 4.41 (m, 3H), 3.91 (dd,  $J = 11.0, 9.3$  Hz, 1H), 3.77 – 3.63 (m, 3H), 3.59 (t,  $J = 9.2$  Hz, 1H), 3.38 (t,  $J = 3.0$  Hz, 1H), 2.80 (dd,  $J = 10.0, 3.4$  Hz, 1H), 1.87 (ddt,  $J = 11.0, 7.4, 3.2$  Hz, 1H), 1.53 (s, 4H, 2  $\times$   $\text{NH}_2$ ).  $^{13}\text{C-NMR}$  (101 MHz,  $\text{CDCl}_3$ )  $\delta$  138.9, 138.7, 138.6, 138.2, 128.6, 128.5, 128.5, 128.1, 128.0, 127.8, 127.8, 127.7, 127.5, 88.3, 82.3, 78.5, 75.8, 75.4, 75.3, 73.3, 68.8, 56.6, 51.7, 44.8. IR (neat,  $\text{cm}^{-1}$ ):  $\nu$  2856, 1361, 1066. HRMS (ESI)  $m/z$ :  $[\text{M}+\text{H}]^+$  calc for  $\text{C}_{35}\text{H}_{41}\text{N}_2\text{O}_4$  553.30608, found 553.30585.

**Compound 13b**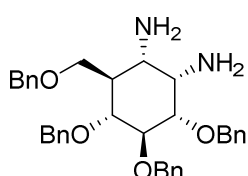

Starting from **12b** (858 mg, 1.42 mmol) and following **GP2**, the product was purified by flash column chromatography (DCM/MeOH, 99:1  $\rightarrow$  7:3) affording compound **13b** as a colorless oil (750 mg, 96%).  $^1\text{H-NMR}$  (400 MHz,  $\text{CDCl}_3$ )  $\delta$  7.27 (m, 20H), 4.91 (t,  $J = 11.9$  Hz, 2H), 4.79 (d,  $J = 10.7$  Hz, 1H), 4.69 (d,  $J = 11.7$  Hz, 1H), 4.64 (d,  $J = 11.6$  Hz, 1H), 4.46 (d,  $J = 27.6$  Hz, 3H), 3.90 (t,  $J = 9.2$  Hz, 1H), 3.77 (d,  $J = 7.6$  Hz, 1H), 3.64 (d,  $J = 7.8$  Hz, 1H), 3.50 (t,  $J = 9.6$  Hz, 1H), 3.49 – 3.43 (m, 2H), 2.91 (d,  $J = 10.9$  Hz, 1H), 1.97 (t,  $J = 10.9$  Hz, 1H), 1.87 (s, 4H, 2  $\times$   $\text{NH}_2$ ).  $^{13}\text{C-NMR}$  (101 MHz,  $\text{CDCl}_3$ )  $\delta$  139.1, 138.9, 138.5, 128.6, 128.5, 128.1, 128.0, 127.9, 127.9, 127.8, 127.6, 127.6, 83.1, 81.6, 78.9, 75.7, 75.4, 73.2, 72.2, 66.1, 53.3, 49.6, 43.4. IR (neat,  $\text{cm}^{-1}$ ):  $\nu$  2860, 1602, 1496, 1452, 1359, 1066. HRMS (ESI)  $m/z$ :  $[\text{M}+\text{Na}]^+$  calc for  $\text{C}_{35}\text{H}_{40}\text{N}_2\text{O}_4\text{Na}$  575.28803, found 575.28741.

**Compound 14a**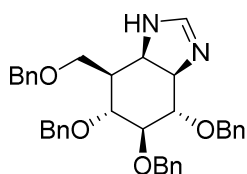

Starting from **13a** (55 mg, 0.1 mmol) and following **GP3** using trimethyl orthoformate, the product was purified by flash column chromatography (DCM/MeOH, 99:1  $\rightarrow$  7:3) affording compound **14a** as a colorless oil (43 mg, 76%).  $^1\text{H-NMR}$  (400 MHz,  $\text{CD}_3\text{CN}$ )  $\delta$  7.41 – 7.18 (m, 20H), 7.07 (s, 1H), 4.84 – 4.64 (m, 5H), 4.51 – 4.42 (m, 3H), 4.01 (dd,  $J = 9.5, 4.4$  Hz, 1H), 3.86 (dd,  $J = 9.4, 6.2$  Hz, 1H), 3.77 (dd,  $J = 9.2, 4.1$  Hz, 1H), 3.68 (t,  $J = 8.8$  Hz, 1H), 3.58 – 3.51 (m, 1H), 3.50 – 3.40 (m, 2H), 2.25 (ddt,  $J = 12.3, 8.4, 4.2$  Hz, 1H).  $^{13}\text{C-NMR}$  (101 MHz,  $\text{CD}_3\text{CN}$ )  $\delta$  156.2, 140.0, 139.9, 139.8, 139.7, 129.3, 129.2, 129.2, 128.9, 128.8, 128.7, 128.5, 128.4, 128.4, 85.1, 83.5, 78.9, 74.7, 74.5, 74.1, 73.7, 69.9, 65.6, 60.7, 41.7. IR (neat,  $\text{cm}^{-1}$ ):  $\nu$  3278, 3030, 2862, 1654, 1543, 1359, 1066. HRMS (ESI)  $m/z$ :  $[\text{M}+\text{H}]^+$  calc for  $\text{C}_{36}\text{H}_{38}\text{N}_2\text{O}_4$  563.29043, found 563.29022.

**Compound 14b**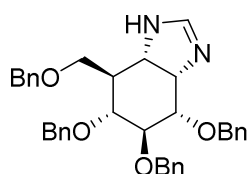

Starting from **13b** (110 mg, 0.2 mmol) and following **GP3** using trimethyl orthoformate, the product was purified by flash column chromatography (DCM/MeOH, 99:1  $\rightarrow$  4:1) affording compound **14b** as a colorless oil (98 mg, 87%).  $^1\text{H-NMR}$  (400 MHz,  $\text{CD}_3\text{CN}$ )  $\delta$  7.38 – 7.20 (m, 20H), 7.03 (s, 1H), 4.78 – 4.62 (m, 5H), 4.53 – 4.44 (m, 3H), 3.97 (dd,  $J = 9.3, 4.3$  Hz, 1H), 3.86 – 3.81 (m, 1H), 3.81 – 3.78 (m, 1H), 3.70 (t,  $J = 7.0$  Hz, 1H), 3.67 – 3.63 (m, 2H), 3.38 (dd,  $J = 11.3, 7.2$  Hz, 1H), 1.74 – 1.66 (m, 1H).  $^{13}\text{C-NMR}$  (101 MHz,  $\text{CD}_3\text{CN}$ )  $\delta$  155.7, 140.1, 140.0, 140.0, 139.8, 129.3, 129.2, 129.2, 128.9, 128.8, 128.7, 128.7, 128.5, 128.4, 128.4, 83.4, 79.6, 79.1, 74.5, 74.4, 73.8, 73.3, 69.2, 61.7, 60.5, 46.2. IR (neat,  $\text{cm}^{-1}$ ):  $\nu$  3030, 2868, 1681, 1595, 1454, 1087. HRMS (ESI)  $m/z$ :  $[\text{M}+\text{H}]^+$  calc for  $\text{C}_{36}\text{H}_{39}\text{N}_2\text{O}_4$  563.29043, found 563.29010.

**Compound 16a**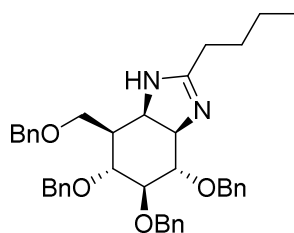

Starting from **13a** (119 mg, 0.21 mmol) and following **GP3** using trimethyl orthoformate, the product was purified by flash column chromatography (DCM/MeOH, 99:1  $\rightarrow$  8:2) affording compound **16a** as a colorless oil (99 mg, 74%).  $^1\text{H-NMR}$  (400 MHz,  $\text{CD}_3\text{CN}$ )  $\delta$  7.39 – 7.18 (m, 20H), 4.73 (m, 5H), 4.51 – 4.43 (m, 3H), 3.99 (dd,  $J = 9.0, 4.4$  Hz, 1H), 3.77 (dt,  $J = 9.2, 4.6$  Hz, 2H), 3.68 (t,  $J = 8.8$  Hz, 1H), 3.53 (t,  $J = 7.5$  Hz, 1H), 3.46 – 3.39 (m, 2H), 2.19 (dq,  $J = 12.8, 4.3$  Hz, 1H), 2.07 (td,  $J = 7.4, 3.6$  Hz, 2H), 1.51 – 1.42 (m, 2H), 1.31 (dq,  $J = 14.2, 7.2$  Hz, 2H), 0.88 (t,  $J = 7.3$  Hz, 3H).  $^{13}\text{C-NMR}$  (101 MHz,  $\text{CD}_3\text{CN}$ )  $\delta$  168.4, 140.2, 140.0, 139.9, 139.8, 129.3, 129.3, 129.2, 129.2, 128.9, 128.8, 128.7, 128.7, 128.4, 128.4, 128.3, 85.5, 83.7, 79.1, 74.8, 74.6, 73.9, 73.5, 70.0, 66.8, 61.6, 42.2, 29.7, 29.4, 23.1, 14.1. IR (neat,  $\text{cm}^{-1}$ ):  $\nu$  2868, 1600, 1454, 1363, 1066. HRMS (ESI)  $m/z$ :  $[\text{M}+\text{H}]^+$  calc for  $\text{C}_{40}\text{H}_{47}\text{N}_2\text{O}_4$  619.35303, found 619.35266.

**Compound 16b**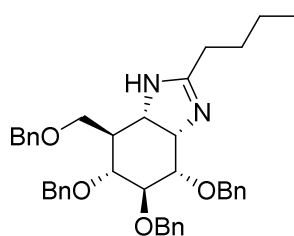

Starting from **13b** (110 mg, 0.2 mmol) and following **GP3** using trimethyl orthovalerate, the product was purified by flash column chromatography (DCM/MeOH, 99:1  $\rightarrow$  4:1) affording compound **16b** as a colorless oil (96 mg, 78%).  $^1\text{H-NMR}$  (400 MHz,  $\text{CD}_3\text{CN}$ )  $\delta$  7.40 – 7.19 (m, 20H), 4.76 (dd,  $J$  = 11.2, 6.3 Hz, 2H), 4.71 – 4.62 (m, 3H), 4.53 – 4.43 (m, 3H), 4.00 (dd,  $J$  = 9.0, 3.5 Hz, 1H), 3.83 (t,  $J$  = 9.4 Hz, 1H), 3.77 – 3.63 (m, 4H), 3.39 (dd,  $J$  = 11.2, 6.5 Hz, 1H), 2.18 (t,  $J$  = 7.6 Hz, 2H), 1.73 (t,  $J$  = 10.4 Hz, 1H), 1.52 (m, 2H), 1.31 (m, 2H), 0.87 (t,  $J$  = 7.3 Hz, 3H).  $^{13}\text{C-NMR}$  (101 MHz,  $\text{CD}_3\text{CN}$ )  $\delta$  168.5, 140.1, 140.0, 139.8, 129.3, 129.2, 129.2, 129.1, 128.8, 128.7, 128.7, 128.6, 128.4, 128.4, 128.4, 128.4, 128.3, 83.6, 80.0, 79.0, 74.6, 74.5, 73.8, 73.3, 69.1, 62.5, 61.0, 46.4, 29.7, 29.5, 23.1, 14.2. IR (neat,  $\text{cm}^{-1}$ ):  $\nu$  2862, 1608, 1454, 1359, 1091. HRMS (ESI)  $m/z$ :  $[\text{M}+\text{H}]^+$  calc for  $\text{C}_{40}\text{H}_{47}\text{N}_2\text{O}_4$  619.35303, found 619.35260.

**Compound 15**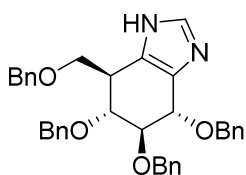

Starting from **14a** (43 mg, 76  $\mu\text{mol}$ ) and following **GP4**, the product was purified by flash column chromatography (DCM/MeOH, 99:1  $\rightarrow$  67:1) affording compound **15** as a colorless oil (32 mg, 75%). Using the same conditions, product **15** could be obtained from imidazolone **14b** (82 mg, 0.15 mmol) in 71% yield (58 mg).  $^1\text{H-NMR}$  (500 MHz,  $\text{CD}_3\text{CN}$ )  $\delta$  7.51 (s, 1H), 7.42 – 7.18 (m, 20H), 5.05 (d,  $J$  = 11.5 Hz, 1H), 4.88 – 4.81 (m, 4H), 4.67 – 4.63 (m, 1H), 4.54 – 4.44 (m, 3H), 3.96 (dd,  $J$  = 9.0, 6.4 Hz, 1H), 3.86 (dd,  $J$  = 9.0, 3.9 Hz, 1H), 3.76 (t,  $J$  = 8.1 Hz, 1H), 3.59 (t,  $J$  = 7.5 Hz, 1H), 3.09 (m, 1H).  $^{13}\text{C-NMR}$  (125 MHz,  $\text{CD}_3\text{CN}$ )  $\delta$  140.3, 140.0, 139.8, 139.4, 136.8, 129.3, 129.2, 129.2, 129.0, 128.8, 128.8, 128.6, 128.5, 128.4, 128.3, 85.6, 79.5, 77.7, 75.5, 75.3, 73.7, 72.7, 70.0, 40.9. IR (neat,  $\text{cm}^{-1}$ ):  $\nu$  3028, 2862, 1496, 1454, 1359, 1087. HRMS (ESI)  $m/z$ :  $[\text{M}+\text{H}]^+$  calc for  $\text{C}_{36}\text{H}_{37}\text{N}_2\text{O}_4$  561.27478, found 561.27454.

**Compound 17**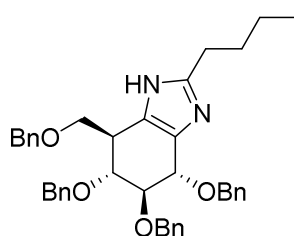

Starting from **16a** (74 mg, 0.12 mmol) and following **GP5**, the product was purified by flash column chromatography (DCM/MeOH, 199:1  $\rightarrow$  99:1) affording compound **17** as a colorless oil (56 mg, 76%). Using the same conditions, product **17** could be obtained from imidazolone **16b** (40 mg, 64.7  $\mu\text{mol}$ ) in 70% yield (28 mg).  $^1\text{H-NMR}$  (400 MHz,  $\text{CD}_3\text{CN}$ )  $\delta$  7.41 – 7.19 (m, 20H), 4.98 (d,  $J$  = 11.7 Hz, 1H), 4.87 – 4.76 (m, 4H), 4.63 (dd,  $J$  = 6.1, 1.5 Hz, 1H), 4.54 – 4.40 (m, 3H), 3.95 (dd,  $J$  = 8.8, 6.2 Hz, 1H), 3.84 (dd,  $J$  = 9.0, 4.1 Hz, 1H), 3.81 – 3.72 (m, 1H), 3.66 – 3.55 (m, 1H), 3.13 – 2.96 (m, 1H), 2.63 (d,  $J$  = 7.6 Hz, 2H), 1.68 – 1.59 (m, 2H), 1.35 (m, 2H), 0.92 (t,  $J$  = 7.4 Hz, 3H).  $^{13}\text{C-NMR}$  (101 MHz,  $\text{CD}_3\text{CN}$ )  $\delta$  150.4, 140.4, 140.0, 139.8, 139.5, 129.3, 129.2, 129.2, 129.1, 128.9, 128.8, 128.7, 128.5, 128.4, 128.4, 128.2, 85.4, 79.3, 77.7, 75.3, 75.2, 73.7, 72.5, 69.8, 41.3, 31.6, 29.0, 23.1, 14.1. IR (neat,  $\text{cm}^{-1}$ ):  $\nu$  2862, 1454, 1359, 1089. HRMS (ESI)  $m/z$ :  $[\text{M}+\text{H}]^+$  calc for  $\text{C}_{40}\text{H}_{45}\text{N}_2\text{O}_4$  617.33738, found 617.33710.



**Compound 6 (gluco-1*H*-imidazole)**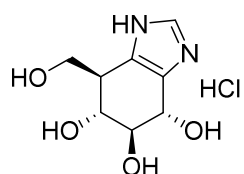

Starting from **15** (26 mg, 46.4  $\mu$ mol) following **GP6**, the pure product was afforded as a colorless oil (12 mg, quant.).  $^1\text{H-NMR}$  (400 MHz,  $\text{D}_2\text{O}$ )  $\delta$  8.55 (s, 1H), 4.69 (d,  $J = 7.6$  Hz, 1H), 4.14 (dd,  $J = 11.4, 2.8$  Hz, 1H), 3.93 (dd,  $J = 11.4, 4.8$  Hz, 1H), 3.79 (t,  $J = 9.4$  Hz, 1H), 3.71 (dd,  $J = 9.8, 7.4$  Hz, 1H), 3.01 (s, 1H).  $^{13}\text{C-NMR}$  (101 MHz,  $\text{D}_2\text{O}$ )  $\delta$  135.2, 128.2, 126.6, 76.9, 69.3, 66.6, 58.8, 40.9. HRMS (ESI-TOF)  $m/z$ :  $[\text{M}+\text{Na}]^+$  calc for  $\text{C}_8\text{H}_{12}\text{N}_2\text{O}_4$  223.0689, found 223.0702.

**Compound 7 (gluco-2-butyl-1*H*-imidazole)**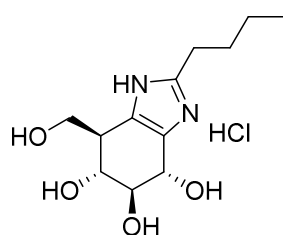

Starting from **17** (48 mg, 77.8  $\mu$ mol) following **GP6**, the pure product was afforded as a colorless oil (24 mg, quant.).  $^1\text{H-NMR}$  (400 MHz, MeOD)  $\delta$  4.53 (d,  $J = 7.4$  Hz, 1H), 4.12 (dd,  $J = 10.8, 3.1$  Hz, 1H), 3.89 (dd,  $J = 10.8, 5.0$  Hz, 1H), 3.72 (t,  $J = 9.0$  Hz, 1H), 3.60 (dd,  $J = 9.3, 7.4$  Hz, 1H), 2.94 (t,  $J = 7.6$  Hz, 2H), 2.87 (s, 1H), 1.69 – 1.58 (m, 2H), 1.29 (m, 2H), 0.86 (t,  $J = 7.3$  Hz, 3H).  $^{13}\text{C-NMR}$  (101 MHz, MeOD)  $\delta$  150.5, 129.7, 127.6, 78.9, 71.1, 68.2, 60.5, 43.0, 31.0, 26.6, 23.1, 13.8. HRMS (ESI-TOF)  $m/z$ :  $[\text{M}+\text{H}]^+$  calc for  $\text{C}_{12}\text{H}_{20}\text{N}_2\text{O}_4$  257.1496, found 257.1510.

Synthesis of conduritol B-1*H*-imidazoles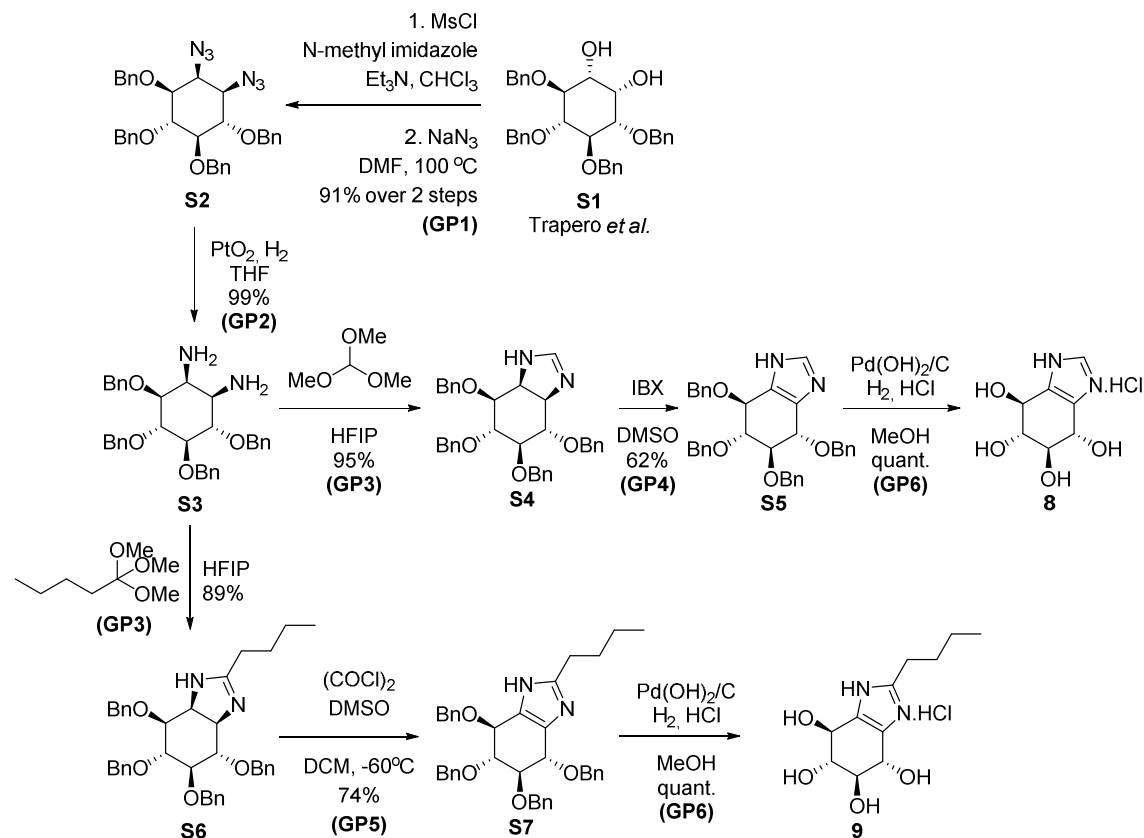Compound **S2**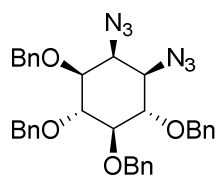

Starting from **S1**<sup>[7]</sup> (1.88 g, 3.48 mmol) and following **GP1**, the product was purified by flash column chromatography (pentane/EtOAc, 9:1) affording compound **S2** as a white solid (1.87 g, 91%). <sup>1</sup>H-NMR (400 MHz, CDCl<sub>3</sub>)  $\delta$  7.45 – 7.27 (m, 20H), 4.98 – 4.91 (m, 3H), 4.89 – 4.82 (m, 3H), 4.82 – 4.72 (m, 2H), 4.01 (t,  $J = 3.1$  Hz, 1H), 3.95 (t,  $J = 9.5$  Hz, 1H), 3.85 (t,  $J = 9.7$  Hz, 1H), 3.60 (dd,  $J = 9.6, 3.2$  Hz, 1H), 3.51 (t,  $J = 9.3$  Hz, 1H), 3.41 (dd,  $J = 10.2, 3.1$  Hz, 1H). <sup>13</sup>C-NMR (101 MHz, CDCl<sub>3</sub>)  $\delta$  138.3, 137.6, 137.4, 128.7, 128.5, 128.5, 128.3, 128.2, 128.1, 128.0, 127.9, 127.8, 127.7, 127.6, 83.9, 81.4, 80.2, 80.0, 76.2, 75.9, 73.4, 62.0, 61.9. HRMS (ESI)  $m/z$ :  $[M+H]^+$  calc for C<sub>34</sub>H<sub>35</sub>N<sub>6</sub>O<sub>4</sub> 613.25337, found 613.25281. This analytical data is in accordance with literature.<sup>[7]</sup>

**Compound S3**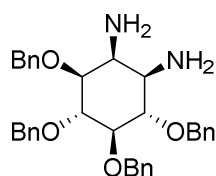

Starting from **S2** (1.8 g, 3.0 mmol) and following **GP2**, the product was purified by flash column chromatography (DCM/MeOH, 99:1  $\rightarrow$  9:1) affording compound **S3** as a white solid (1.63 g, 99%).  $^1\text{H-NMR}$  (400 MHz,  $\text{CDCl}_3$ )  $\delta$  7.43 – 7.13 (m, 20H), 5.03 – 4.87 (m, 3H), 4.82 (dd,  $J = 10.8, 4.4$  Hz, 2H), 4.65 (m, 3H), 4.03 (t,  $J = 9.2$  Hz, 1H), 3.76 (t,  $J = 9.6$  Hz, 1H), 3.50 (m, 3H), 2.66 (dd,  $J = 10.0, 2.7$  Hz, 1H), 1.53 (s, 4H, 2xNH<sub>2</sub>).  $^{13}\text{C-NMR}$  (101 MHz,  $\text{CDCl}_3$ )  $\delta$  138.9, 138.8, 138.5, 128.6, 128.6, 128.5, 128.5, 128.1, 128.1, 127.9, 127.8, 127.8, 127.7, 127.6, 85.3, 82.0, 81.9, 81.9, 76.0, 75.8, 75.6, 72.4, 54.0, 51.8. HRMS (ESI)  $m/z$ :  $[\text{M}+\text{H}]^+$  calc for  $\text{C}_{34}\text{H}_{39}\text{N}_2\text{O}_4$  539.29043, found 539.29007. This analytical data is in accordance with literature.<sup>[7]</sup>

**Compound S4**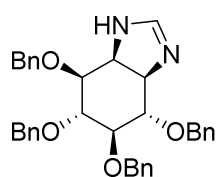

Starting from **S3** (400 mg, 0.74 mmol) and following **GP3** using trimethyl orthoformate, the product was purified by flash column chromatography (DCM/MeOH, 99:1  $\rightarrow$  7:3) affording compound **S4** as a colorless oil (387 mg, 95%).  $^1\text{H-NMR}$  (400 MHz,  $\text{CD}_3\text{CN}$ )  $\delta$  7.34 (m, 20H), 7.14 (s, 1H), 4.76 (s, 2H), 4.75 – 4.63 (m, 6H), 4.16 (dd,  $J = 10.7, 4.2$  Hz, 1H), 3.97 – 3.87 (m, 2H), 3.82 – 3.73 (m, 2H), 3.57 (dd,  $J = 7.7, 5.6$  Hz, 1H).  $^{13}\text{C-NMR}$  (101 MHz,  $\text{CD}_3\text{CN}$ )  $\delta$  155.2, 139.1, 138.9, 138.8, 138.8, 128.3, 128.3, 128.3, 128.2, 127.9, 127.9, 127.8, 127.8, 127.6, 127.6, 127.5, 127.4, 83.2, 81.3, 80.5, 77.0, 73.0, 72.9, 72.9, 72.4, 64.0, 59.5. IR (neat,  $\text{cm}^{-1}$ ):  $\nu$  3030, 2866, 1670, 1452, 1066. HRMS (ESI)  $m/z$ :  $[\text{M}+\text{H}]^+$  calc for  $\text{C}_{35}\text{H}_{37}\text{N}_2\text{O}_4$  549.27478, found 549.27526.

**Compound S5**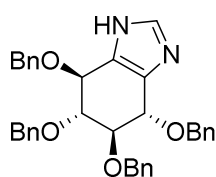

Starting from **S4** (55 mg, 0.1 mmol) and using **GP4**, the product was purified by flash column chromatography (DCM/MeOH, 199:1  $\rightarrow$  67:1) affording compound **S5** as a colorless oil (34 mg, 62%).  $^1\text{H-NMR}$  (400 MHz,  $\text{CD}_3\text{CN}$ )  $\delta$  7.57 (s, 1H), 7.44 – 7.14 (m, 20H), 4.92 – 4.83 (m, 4H), 4.80 (d,  $J = 11.2$  Hz, 2H), 4.74 – 4.70 (m, 2H), 3.91 (dd,  $J = 4.4, 2.2$  Hz, 2H).  $^{13}\text{C-NMR}$  (101 MHz,  $\text{CD}_3\text{CN}$ )  $\delta$  139.9, 137.9, 129.2, 129.2, 128.8, 128.4, 128.4, 84.5, 78.2 (broad, assigned with HSQC), 75.7, 73.2. IR (neat,  $\text{cm}^{-1}$ ):  $\nu$  3030, 2866, 1585, 1496, 1452, 1344, 1053. HRMS (ESI)  $m/z$ :  $[\text{M}+\text{H}]^+$  calc for  $\text{C}_{35}\text{H}_{35}\text{N}_2\text{O}_4$  547.25913, found 547.25897.

**Compound 8 (conduritol B-1*H*-imidazole)**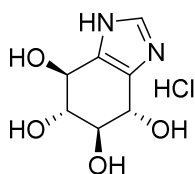

Starting from **S5** (18 mg, 32.9  $\mu\text{mol}$ ) and following **GP6**, the pure product was afforded as a colorless oil (8.0 mg, quant.).  $^1\text{H-NMR}$  (400 MHz,  $\text{D}_2\text{O}$ )  $\delta$  8.70 (s, 1H), 4.76 (m, 2H), 3.74 – 3.58 (d,  $J = 2.7$  Hz, 2H).  $^{13}\text{C-NMR}$  (101 MHz,  $\text{D}_2\text{O}$ )  $\delta$  135.8, 127.5, 75.9, 66.5. HRMS (ESI-TOF)  $m/z$ :  $[\text{M}+\text{Na}]^+$  calc for  $\text{C}_7\text{H}_{10}\text{N}_2\text{O}_4$  209.0533, found 209.0542.

**Compound S6**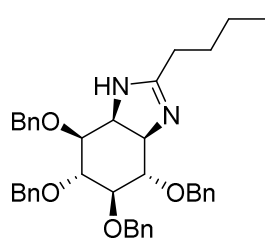

Starting from **S3** (53 mg, 0.1 mmol) and following **GP3** using trimethyl orthovalerate, the product was purified by flash column chromatography (DCM/MeOH, 99:1  $\rightarrow$  8:2) affording compound **S6** as a colorless oil (53 mg, 89%).  $^1\text{H-NMR}$  (400 MHz,  $\text{CD}_3\text{CN}$ )  $\delta$  7.42 – 7.18 (m, 20H), 4.77 – 4.56 (m, 8H), 4.11 (dd,  $J$  = 10.2, 4.1 Hz, 1H), 3.89 – 3.77 (m, 2H), 3.75 – 3.66 (m, 2H), 3.51 (dd,  $J$  = 7.8, 5.7 Hz, 1H), 2.19 – 2.06 (t,  $J$  = 7.6 Hz, 2H), 1.55 – 1.42 (m, 2H), 1.29 (m, 2H), 0.84 (t,  $J$  = 7.3 Hz, 3H).  $^{13}\text{C-NMR}$  (101 MHz,  $\text{CD}_3\text{CN}$ )  $\delta$  168.9, 140.2, 139.9, 139.8, 129.2, 129.2, 128.9, 128.8, 128.6, 128.5, 128.4, 84.2, 82.3, 81.8, 78.5, 73.9, 73.8, 73.3, 65.6, 61.5, 29.5, 29.4, 23.1, 14.1. IR (neat,  $\text{cm}^{-1}$ ):  $\nu$  2870, 1606, 1454, 1357, 1064. HRMS (ESI)  $m/z$ :  $[\text{M}+\text{H}]^+$  calc for  $\text{C}_{39}\text{H}_{45}\text{N}_2\text{O}_4$  605.33738, found 605.33722.

**Compound S7**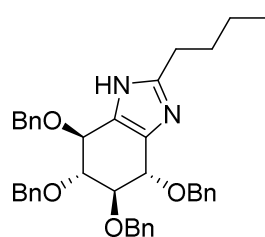

Starting from **S6** (53 mg, 0.088 mmol) and following **GP5**, the product was purified by flash column chromatography (DCM/MeOH, 99:1) affording compound **S7** as a colorless oil (39 mg, 74%).  $^1\text{H-NMR}$  (400 MHz,  $\text{CD}_3\text{CN}$ )  $\delta$  7.49 – 7.17 (m, 20H), 4.87 (m, 8H), 4.70 (dd,  $J$  = 4.3, 2.1 Hz, 2H), 3.90 (dd,  $J$  = 4.3, 2.1 Hz, 2H), 2.63 (dd,  $J$  = 8.2, 7.4 Hz, 2H), 1.64 (m, 2H), 1.35 (m, 2H), 0.91 (t,  $J$  = 7.4 Hz, 3H).  $^{13}\text{C-NMR}$  (101 MHz,  $\text{CD}_3\text{CN}$ )  $\delta$  151.6, 140.1, 139.9, 129.2, 128.8, 128.7, 128.4, 128.3, 84.3, 77.0, 75.6, 73.1, 31.5, 29.0, 23.1, 14.1. IR (neat,  $\text{cm}^{-1}$ ):  $\nu$  3030, 2870, 1454, 1355, 1058. HRMS (ESI)  $m/z$ :  $[\text{M}+\text{H}]^+$  calc for  $\text{C}_{39}\text{H}_{43}\text{N}_2\text{O}_4$  603.32173, found 603.32178.

**Compound 9 (conduritol B-2-butyl-1*H*-imidazole)**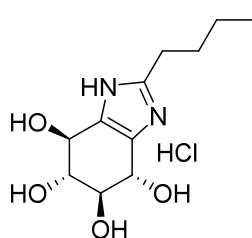

Starting from **S7** (46 mg, 76.3  $\mu\text{mol}$ ) and following **GP6**, the pure product was afforded as a white solid (23 mg, quant.).  $^1\text{H-NMR}$  (400 MHz, MeOD)  $\delta$  4.48 (s, 2H), 3.45 (s, 2H), 2.82 (t,  $J$  = 7.3 Hz, 2H), 1.70 – 1.54 (m, 2H), 1.27 (q,  $J$  = 7.1 Hz, 2H), 0.86 (t,  $J$  = 7.1 Hz, 3H).  $^{13}\text{C-NMR}$  (101 MHz, MeOD)  $\delta$  151.3, 129.1, 78.1, 68.4, 30.8, 26.6, 23.0, 13.8. HRMS (ESI-TOF)  $m/z$ :  $[\text{M}+\text{Na}]^+$  calc for  $\text{C}_{11}\text{H}_{18}\text{N}_2\text{O}_4$  265.1159, found 265.1172.

### $^1\text{H}$ - and $^{13}\text{C}$ -NMR spectra

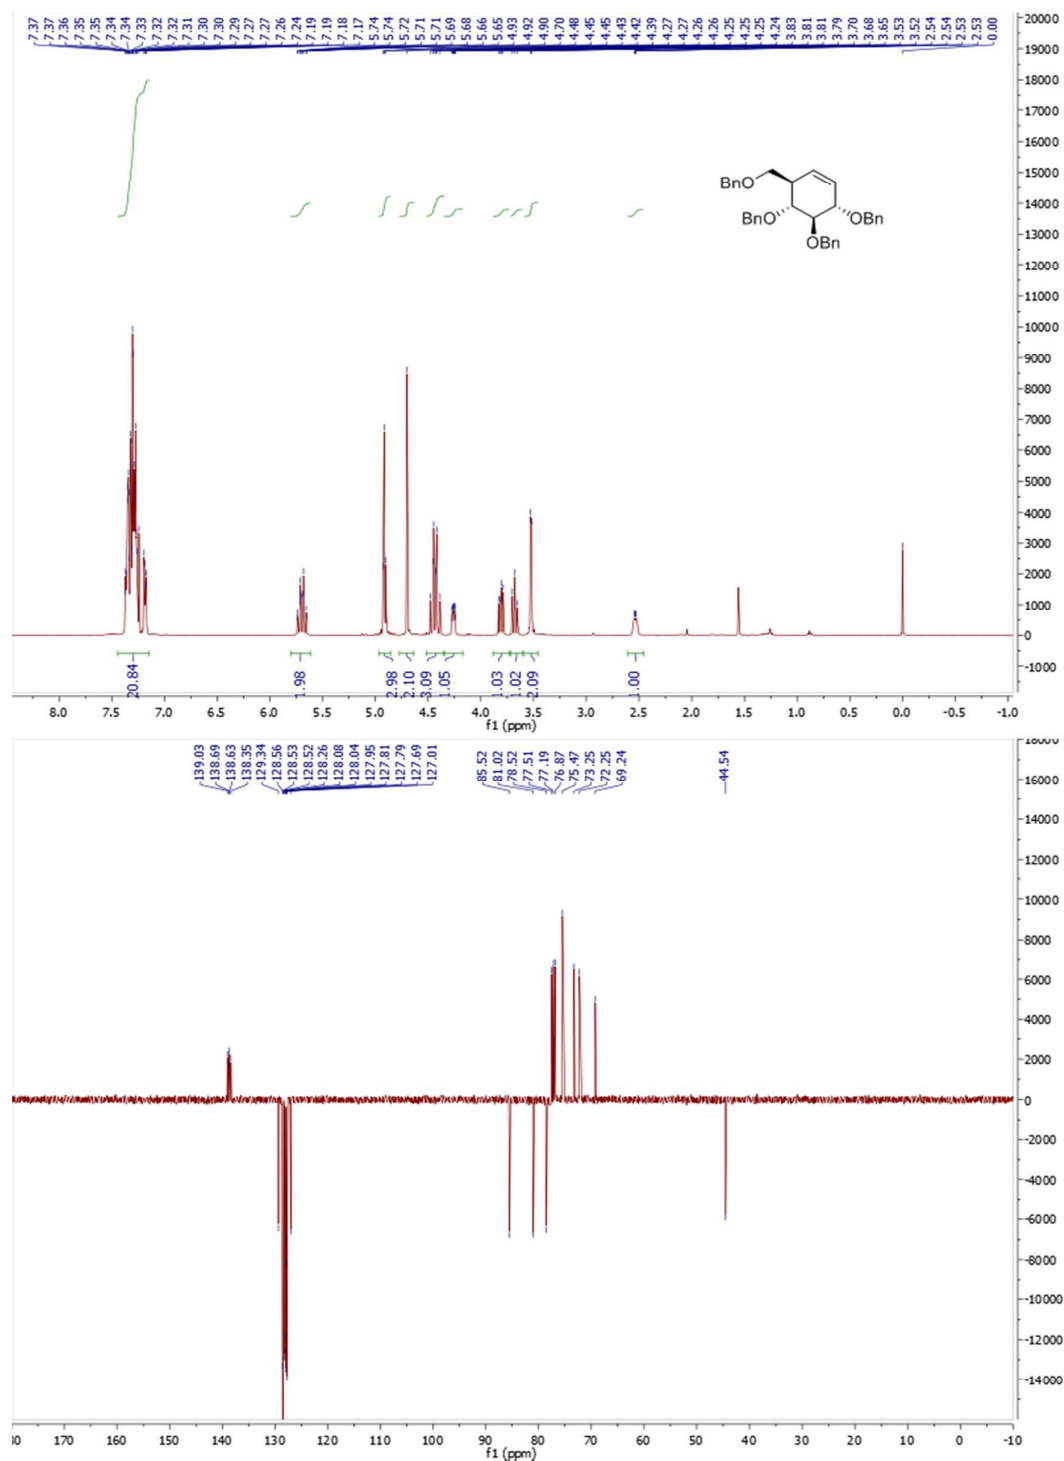

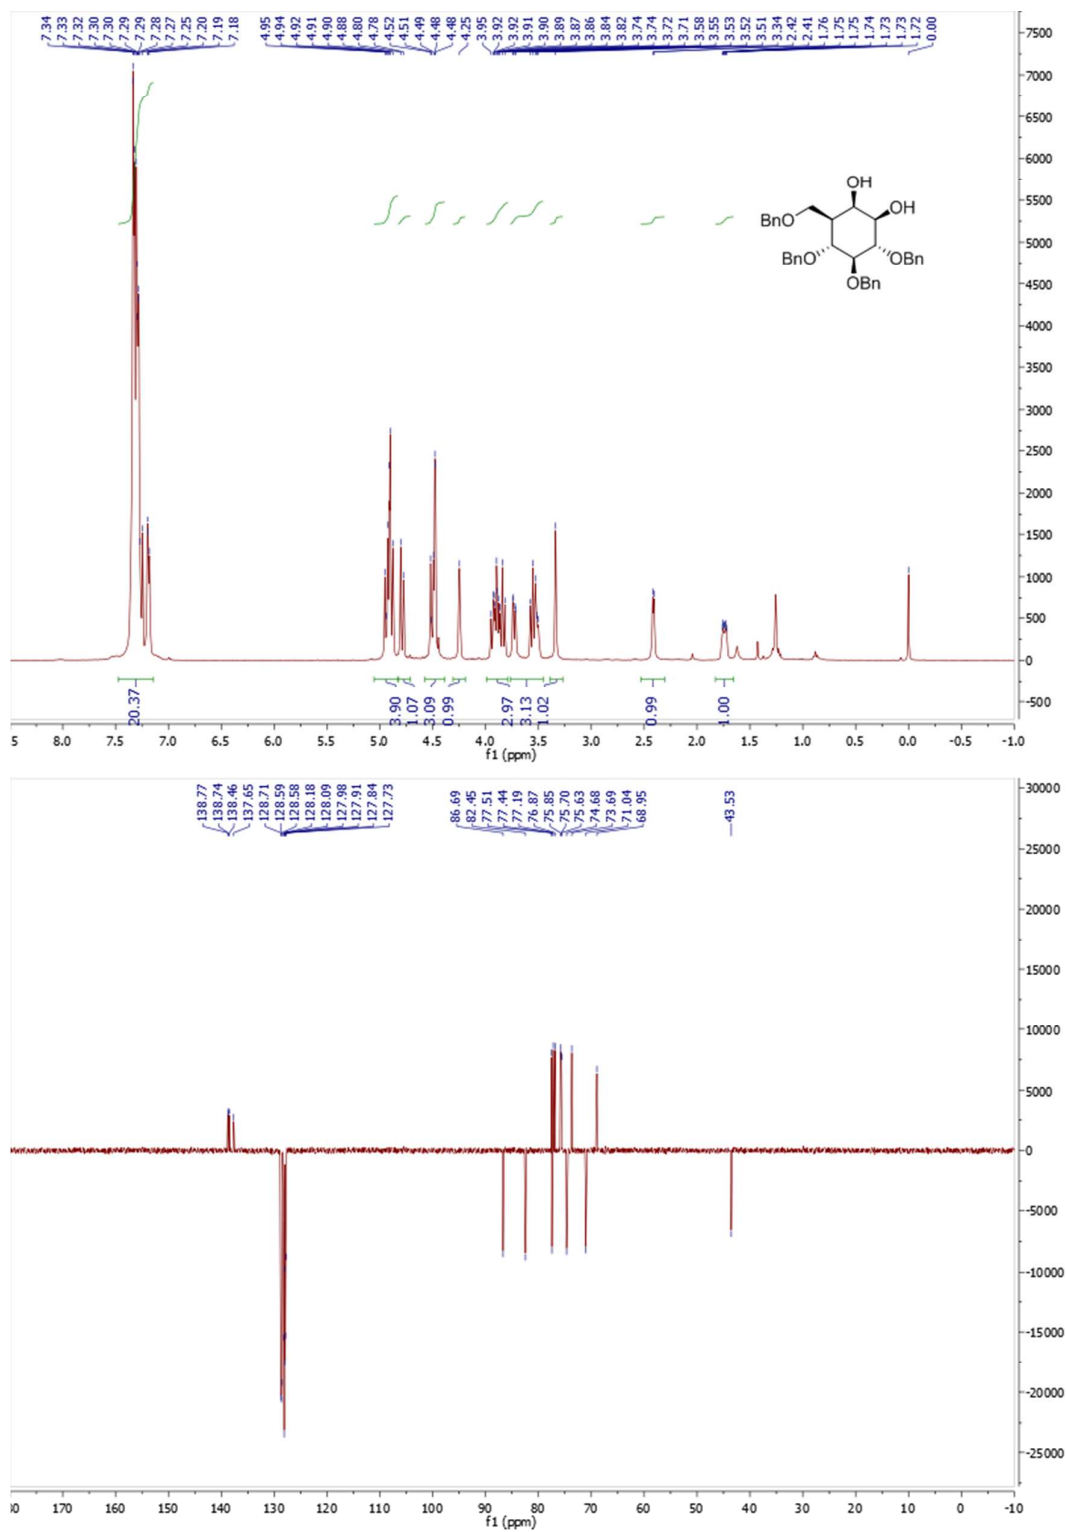

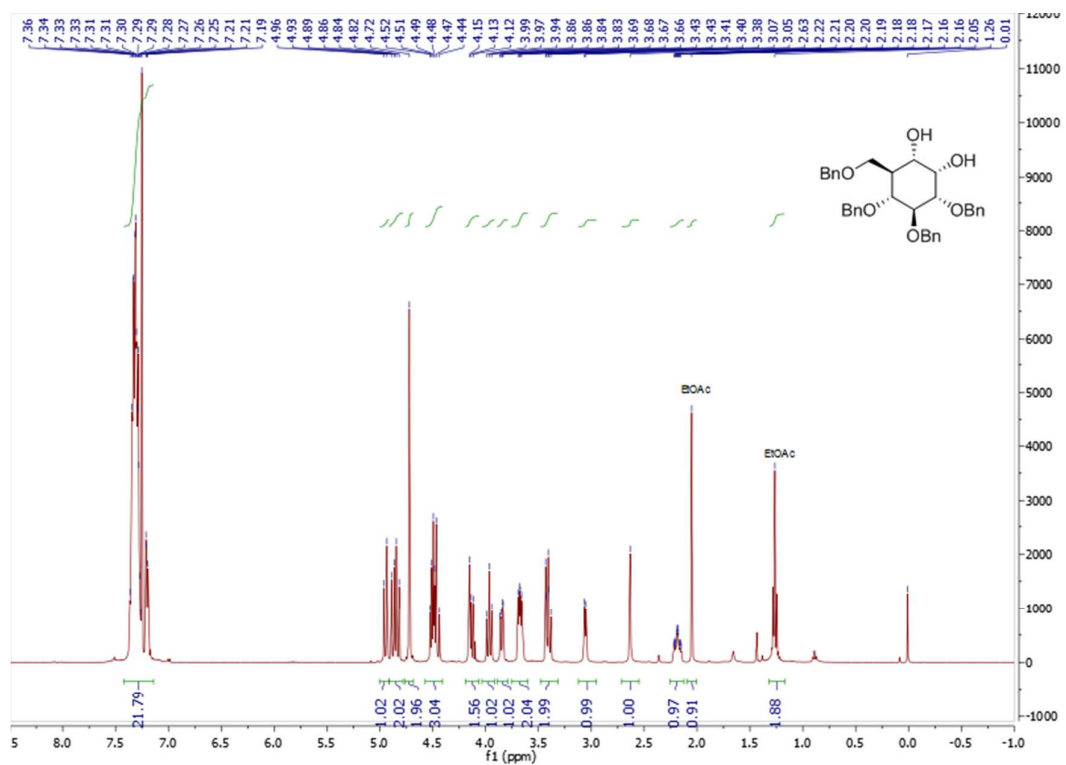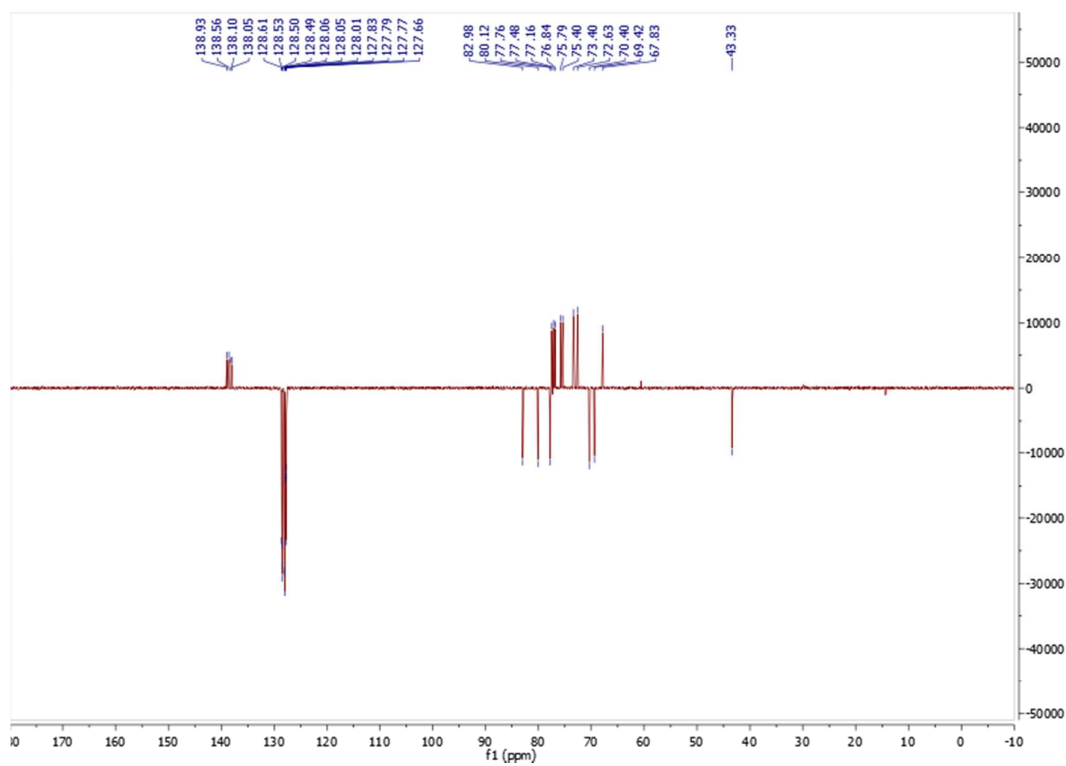

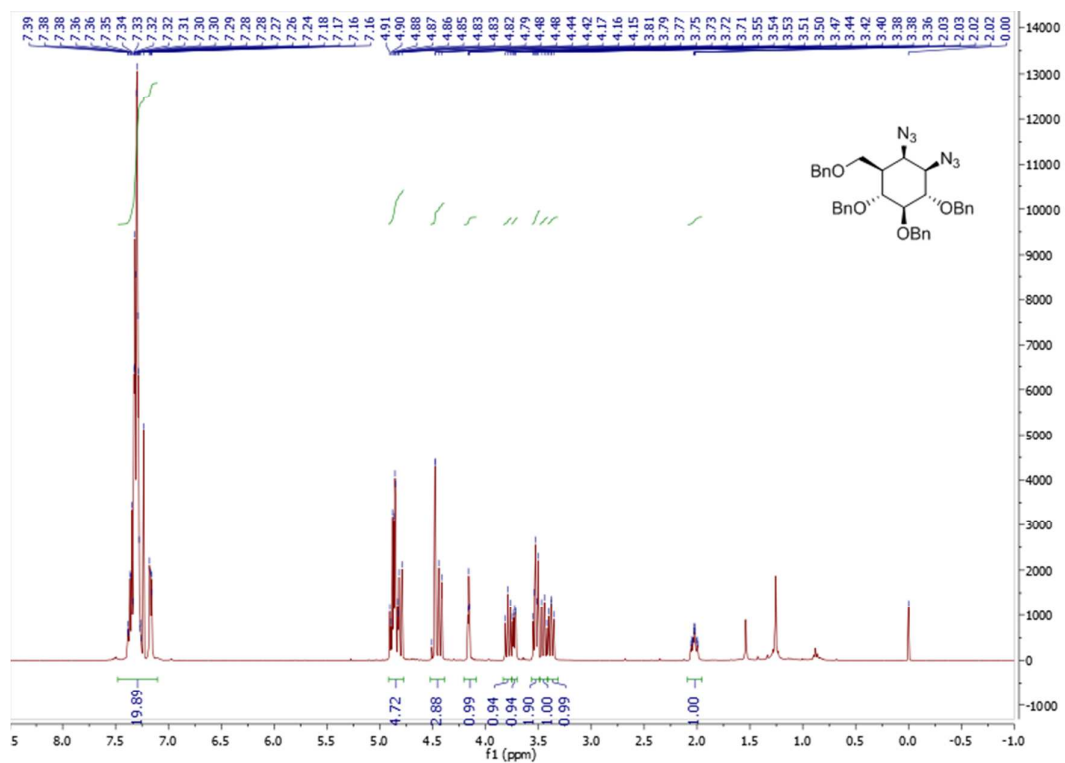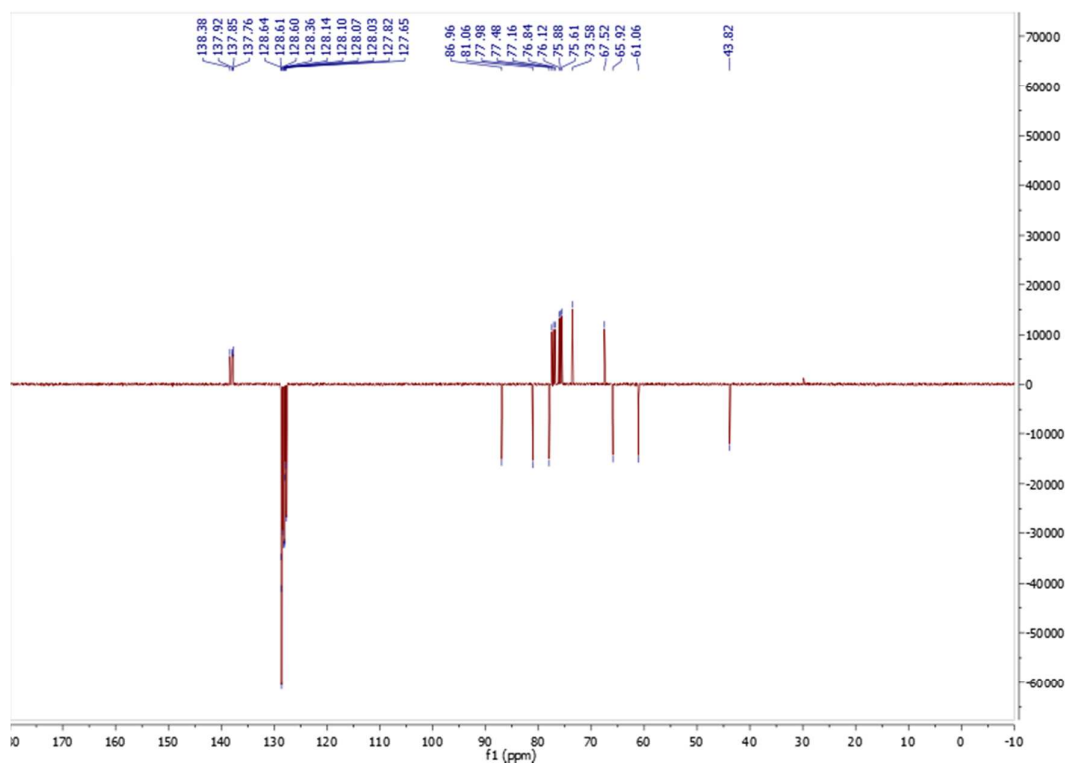



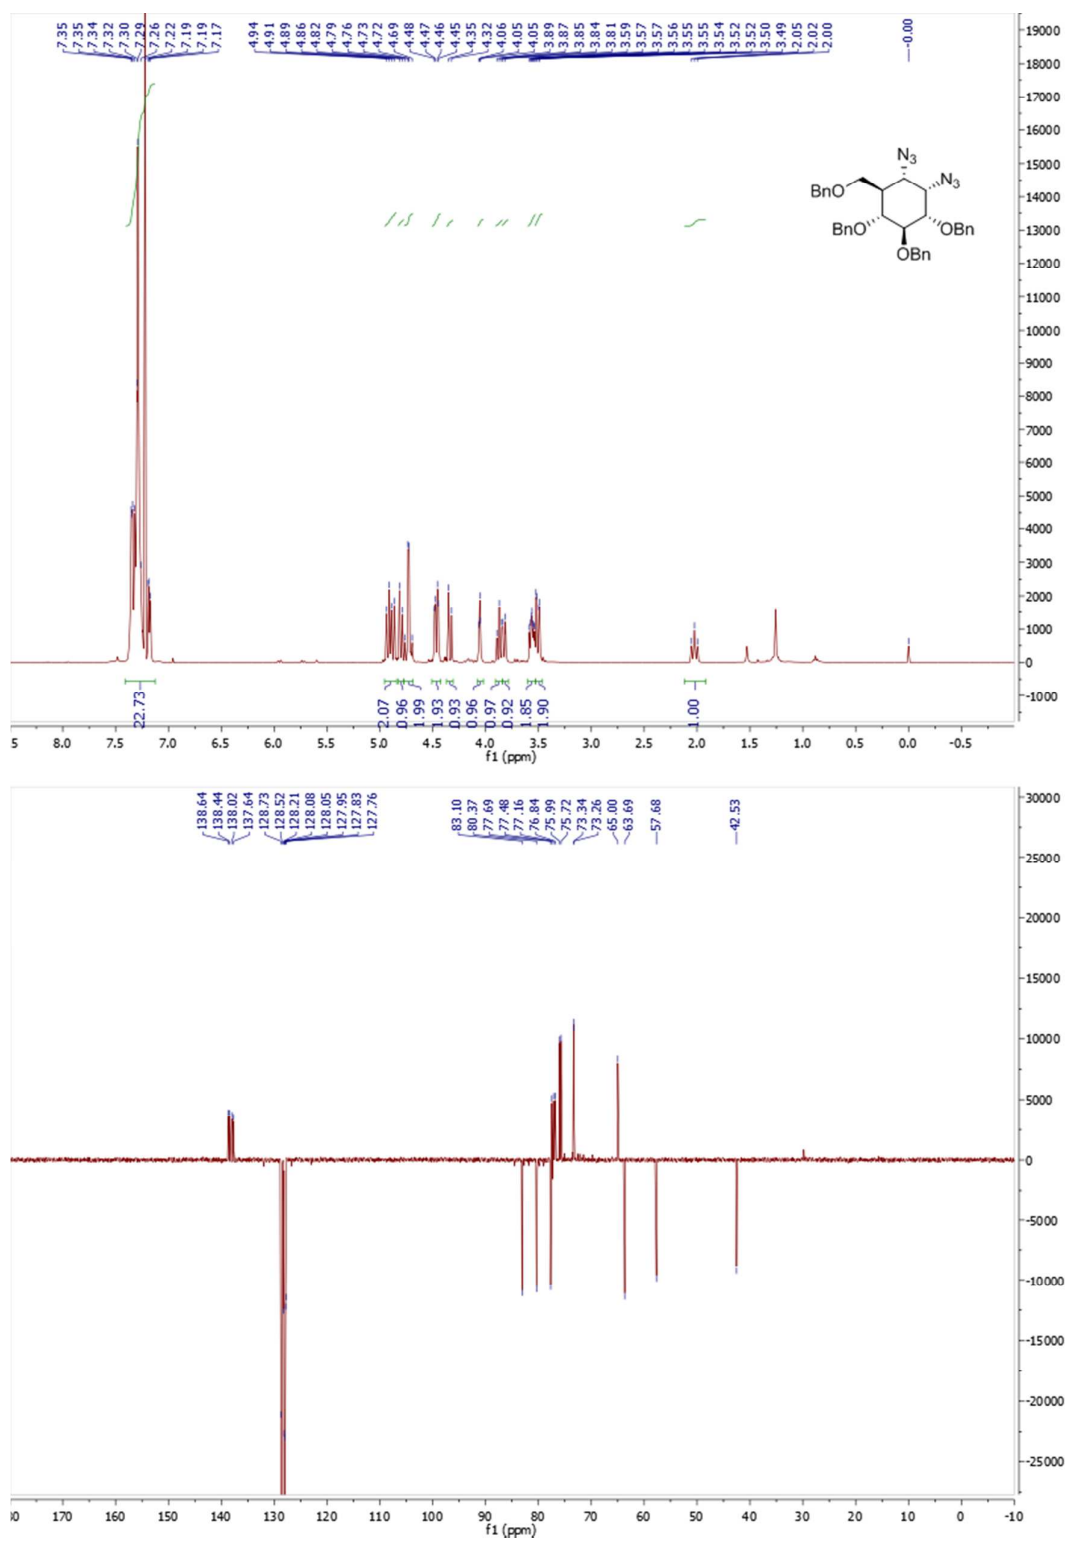

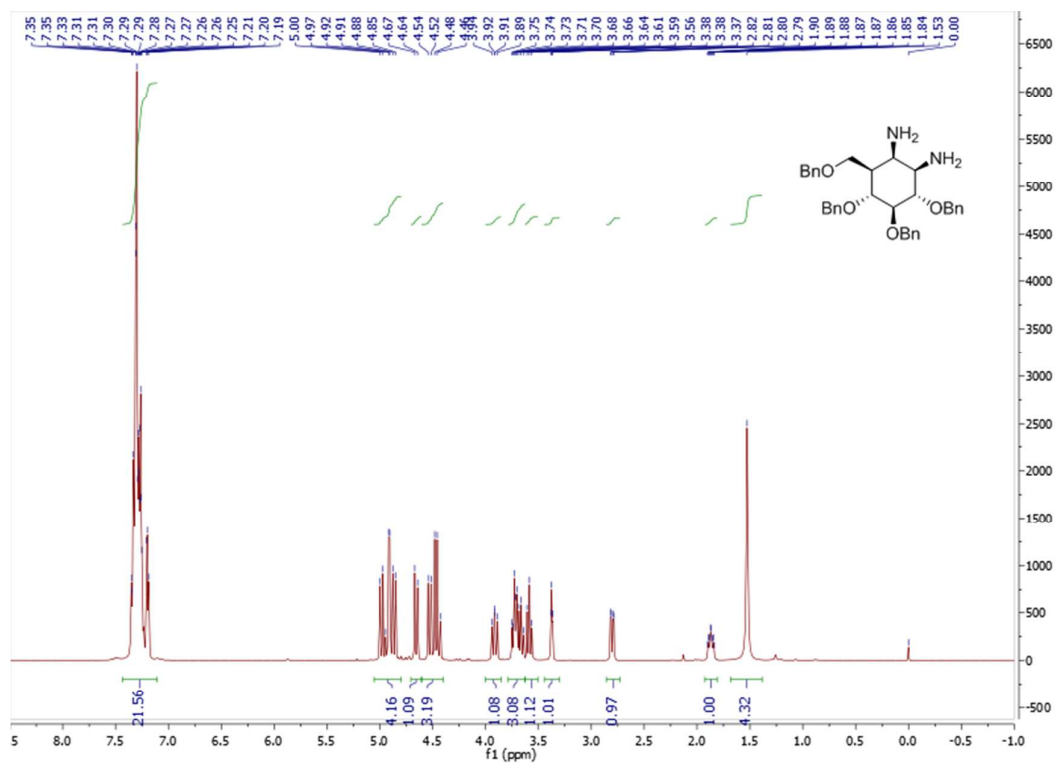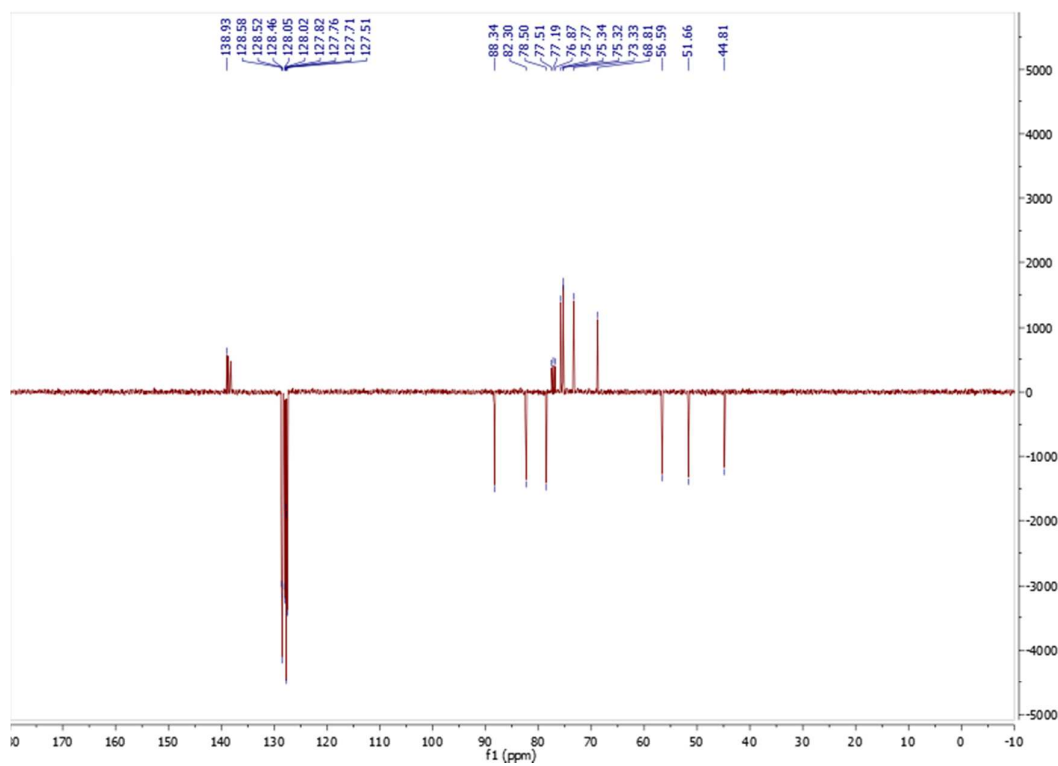

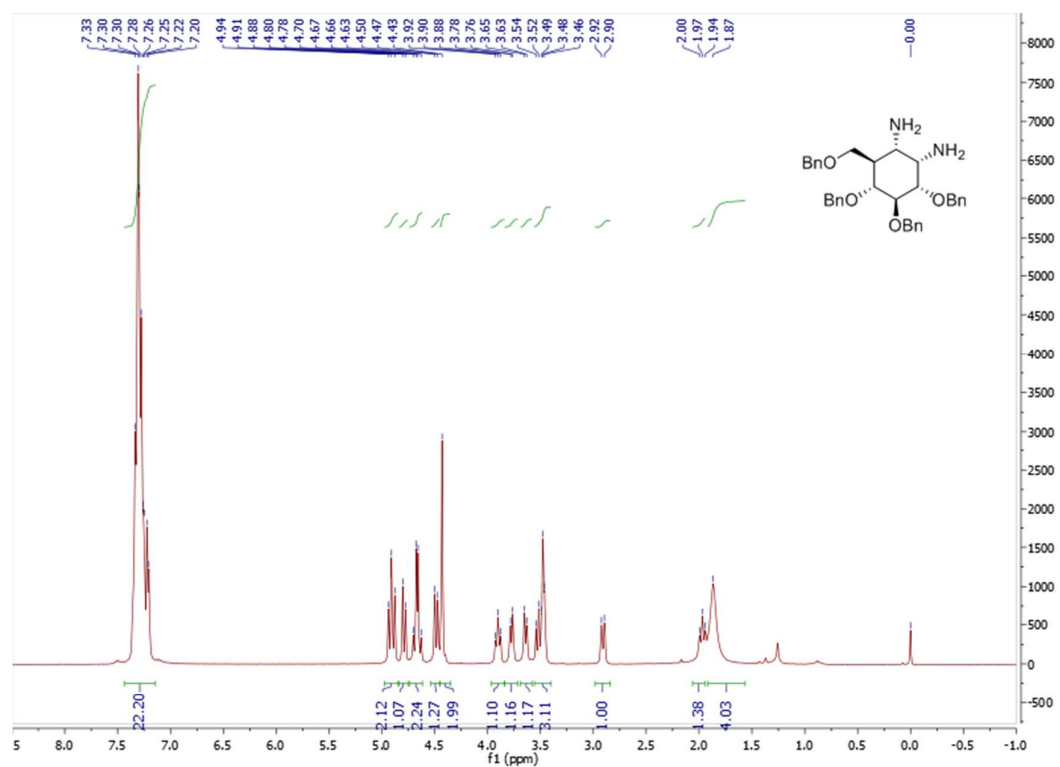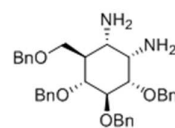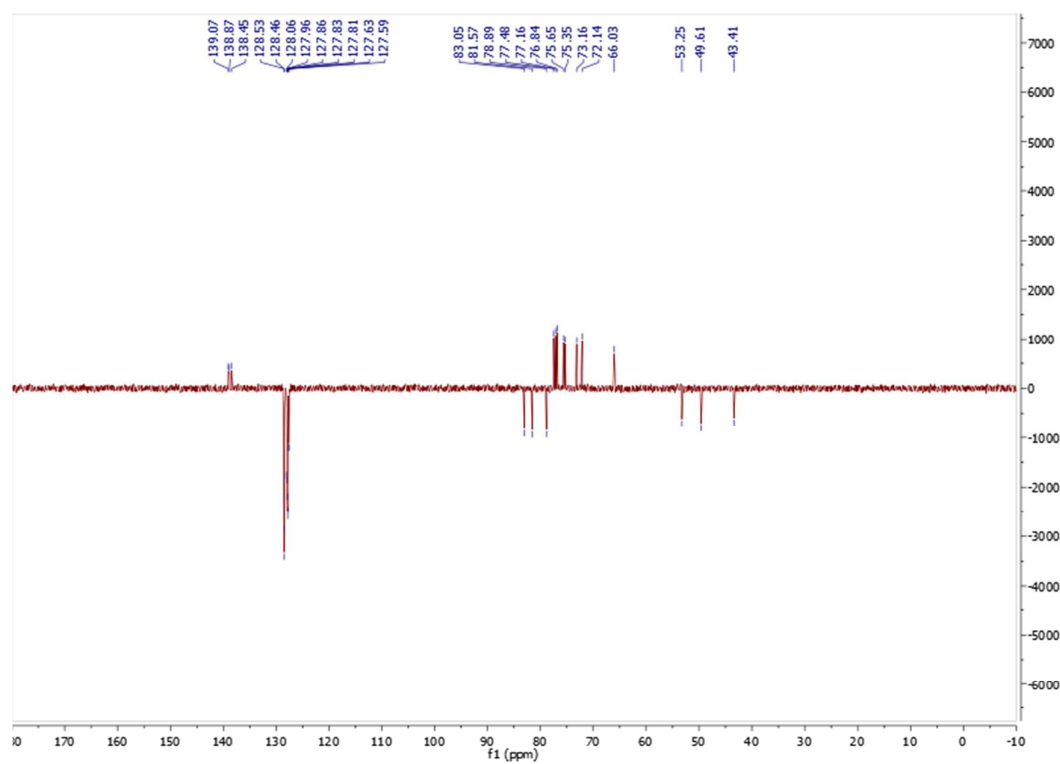





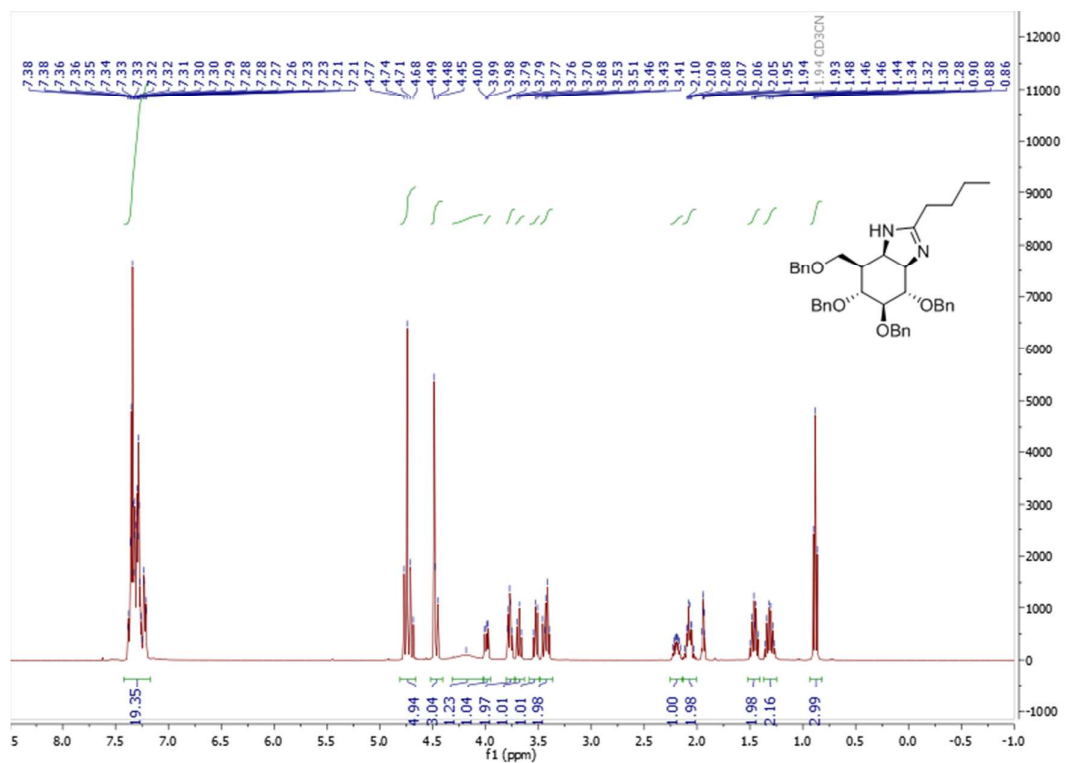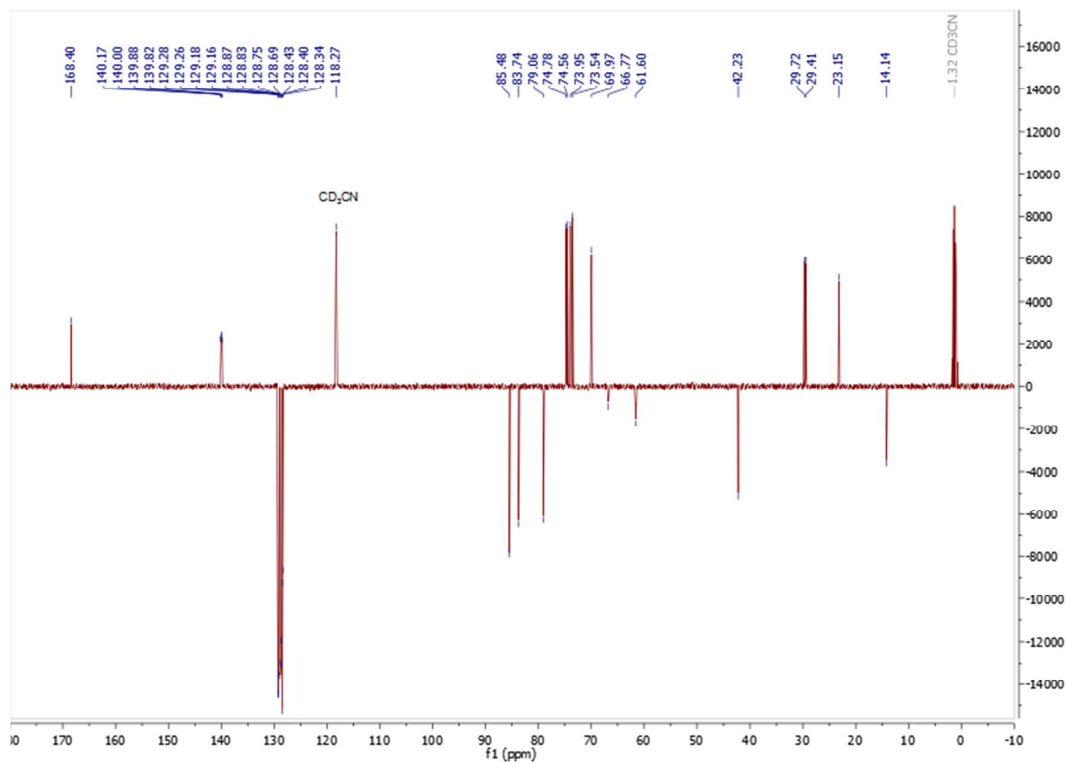

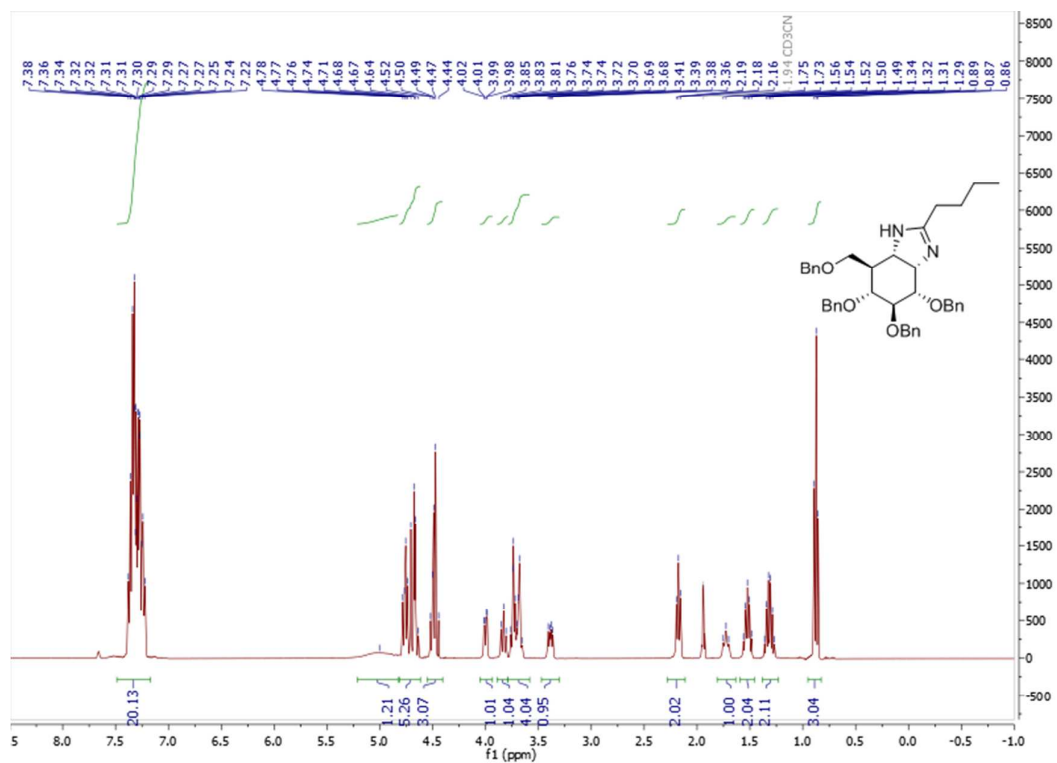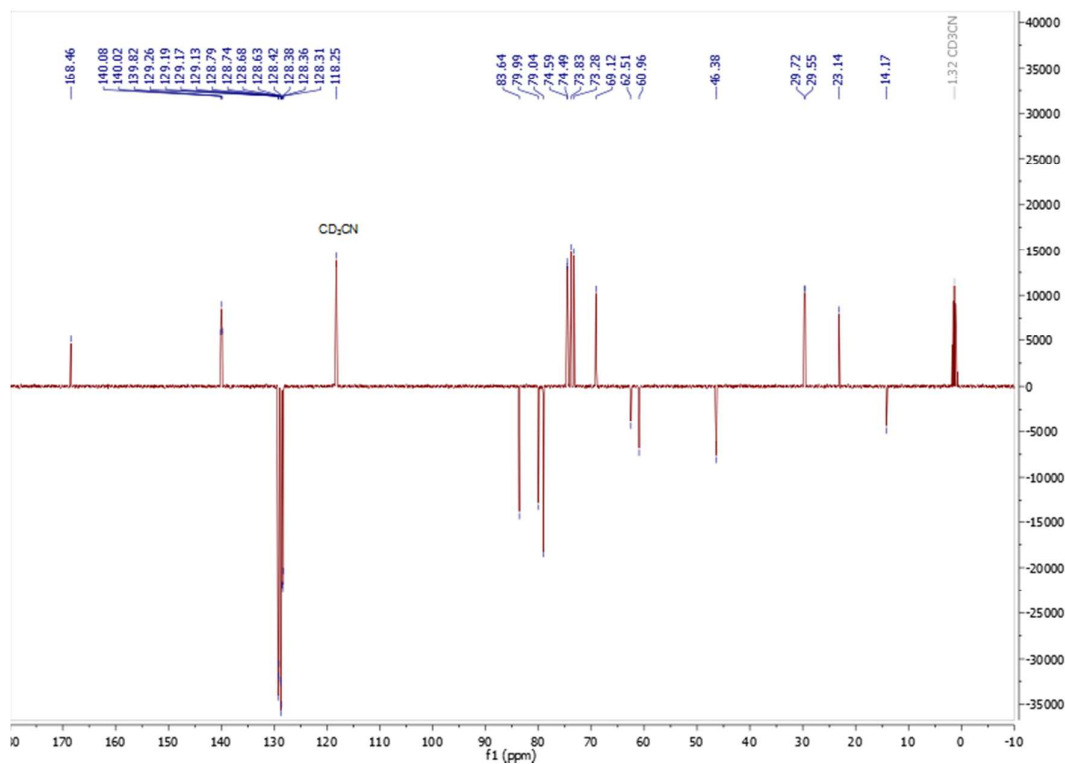

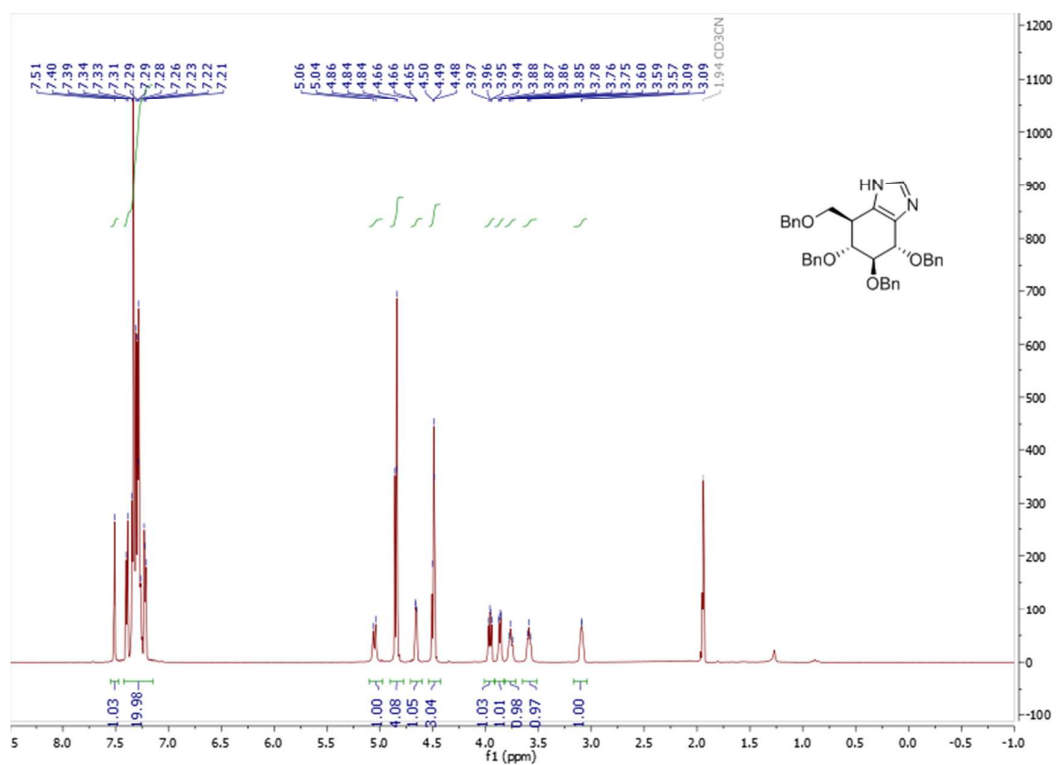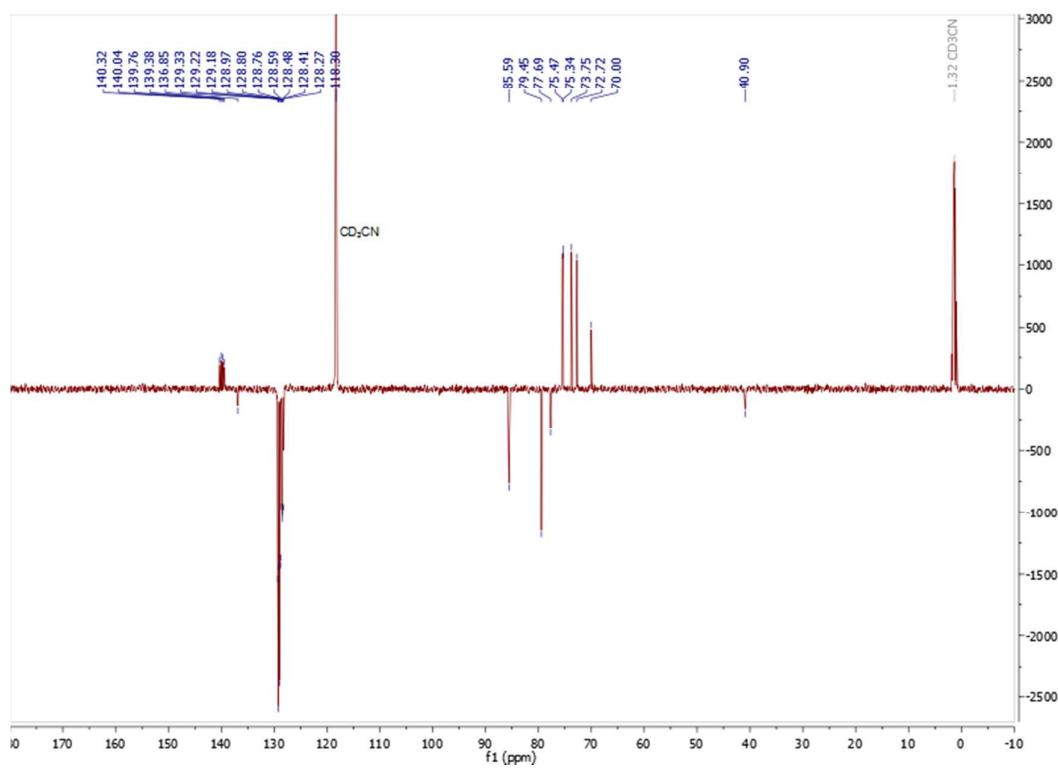





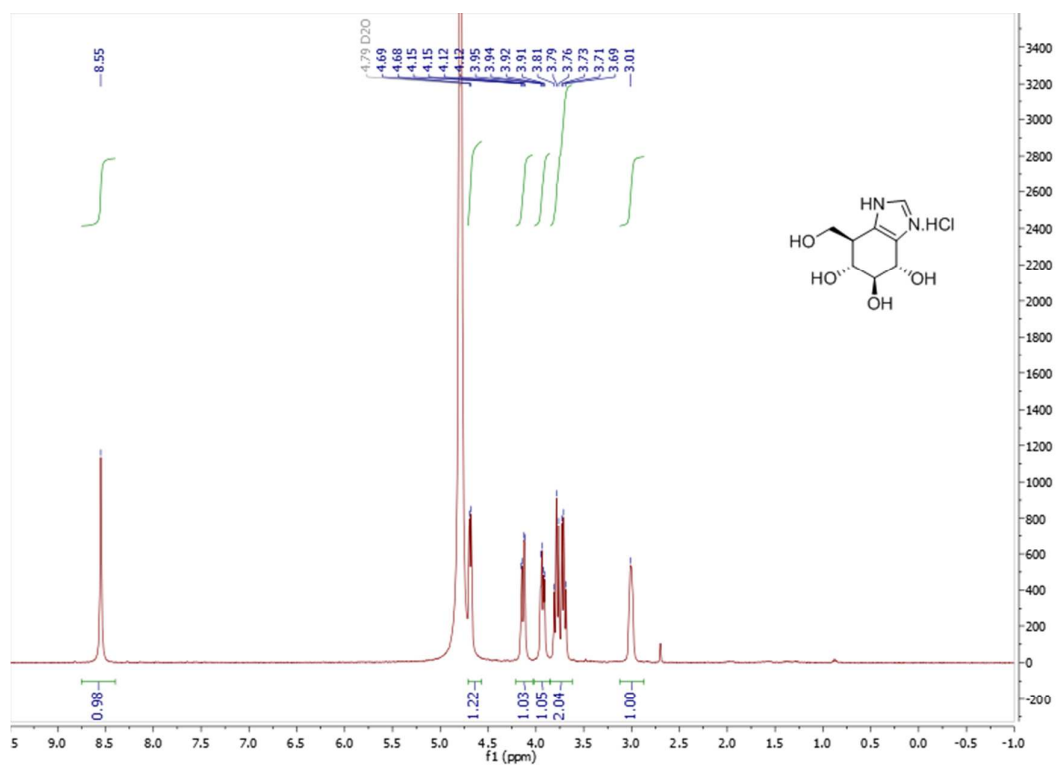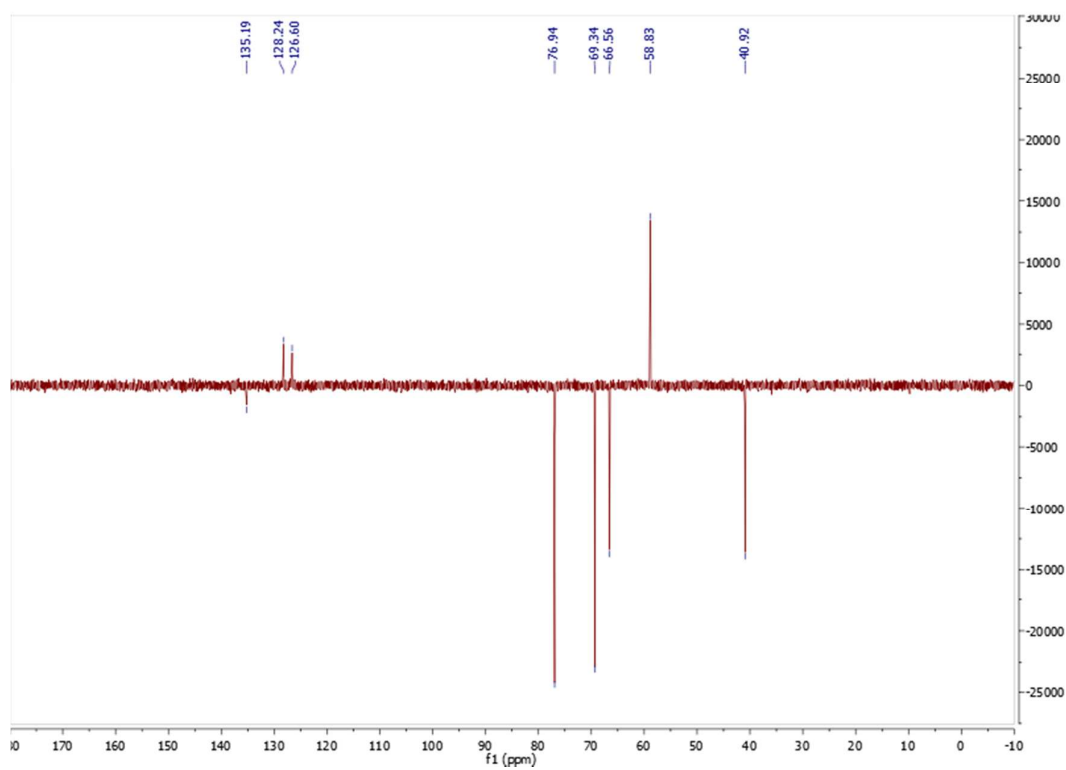

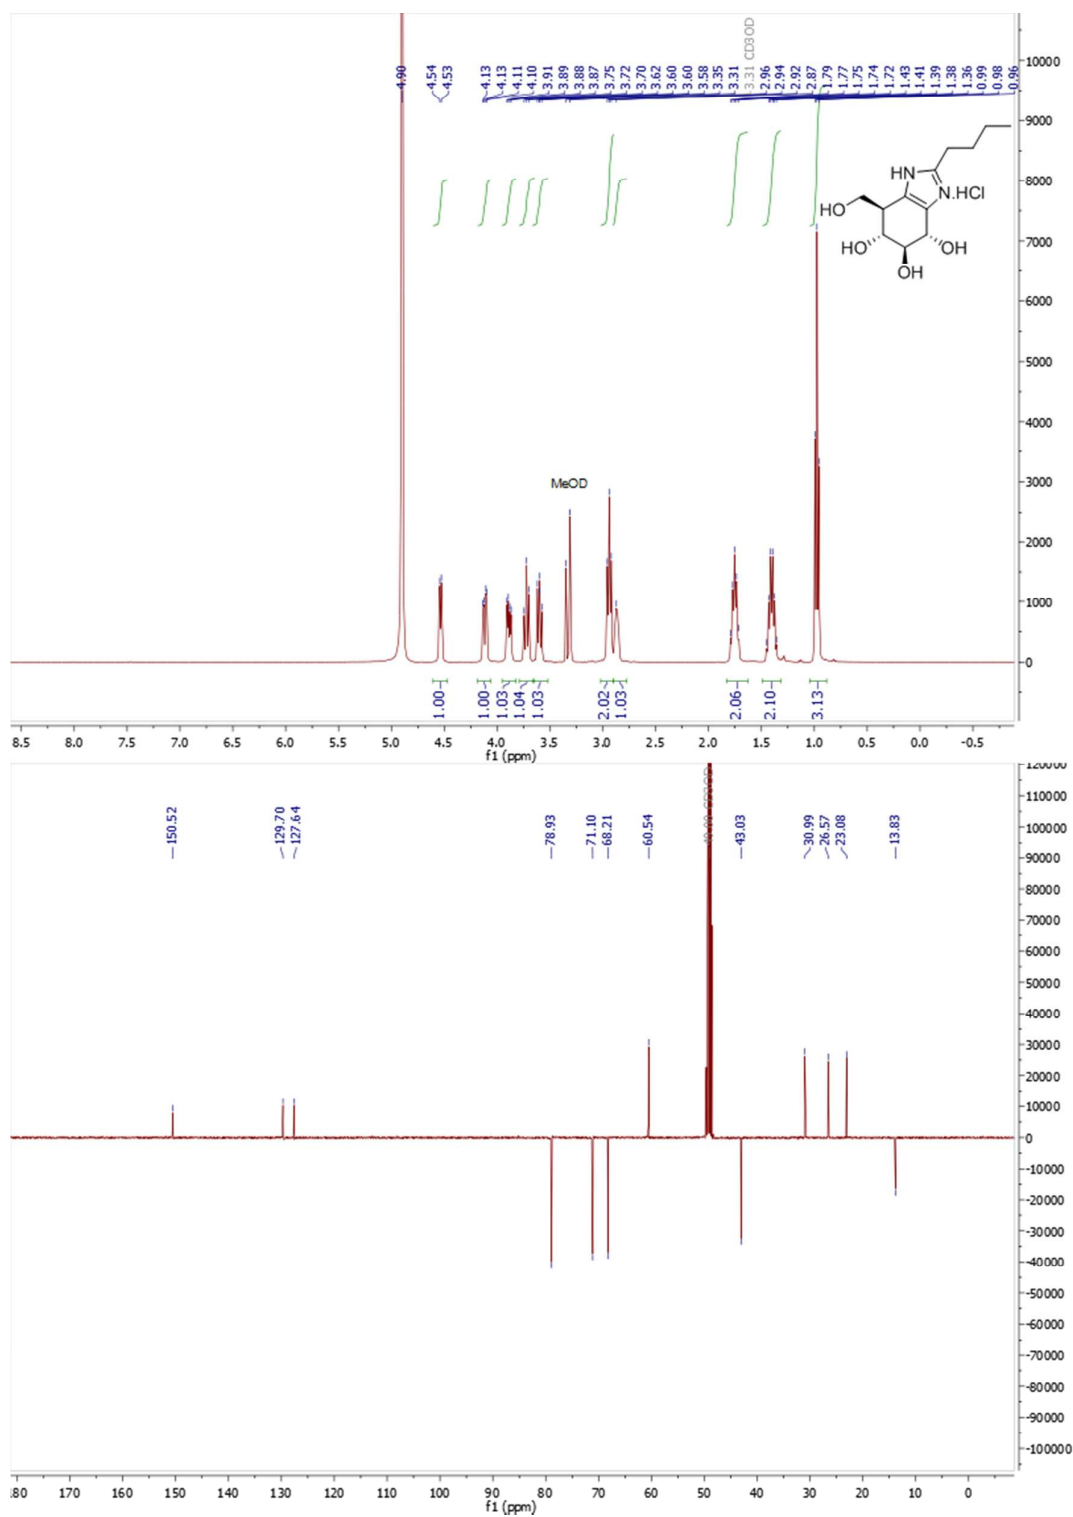

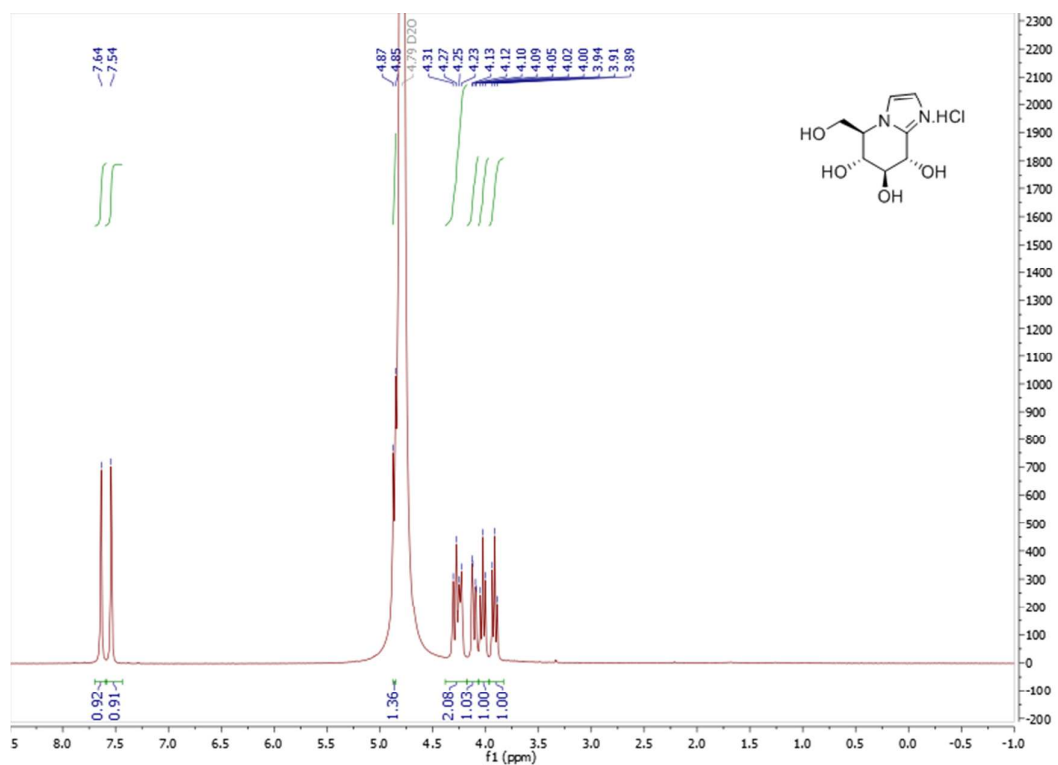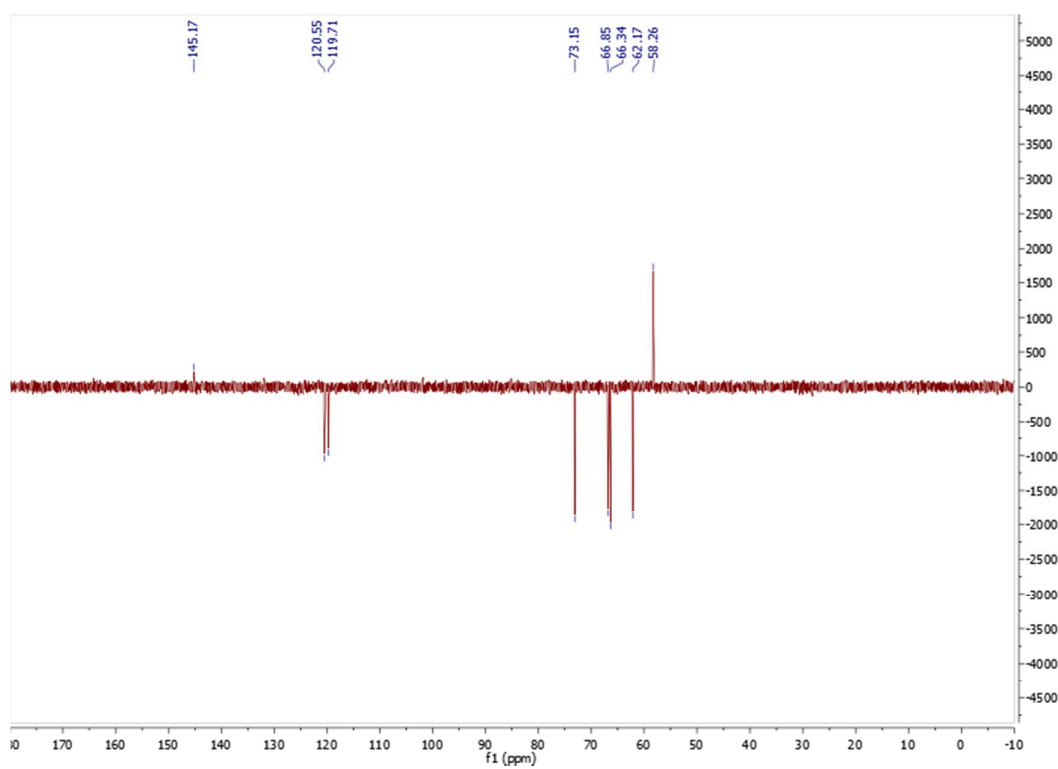

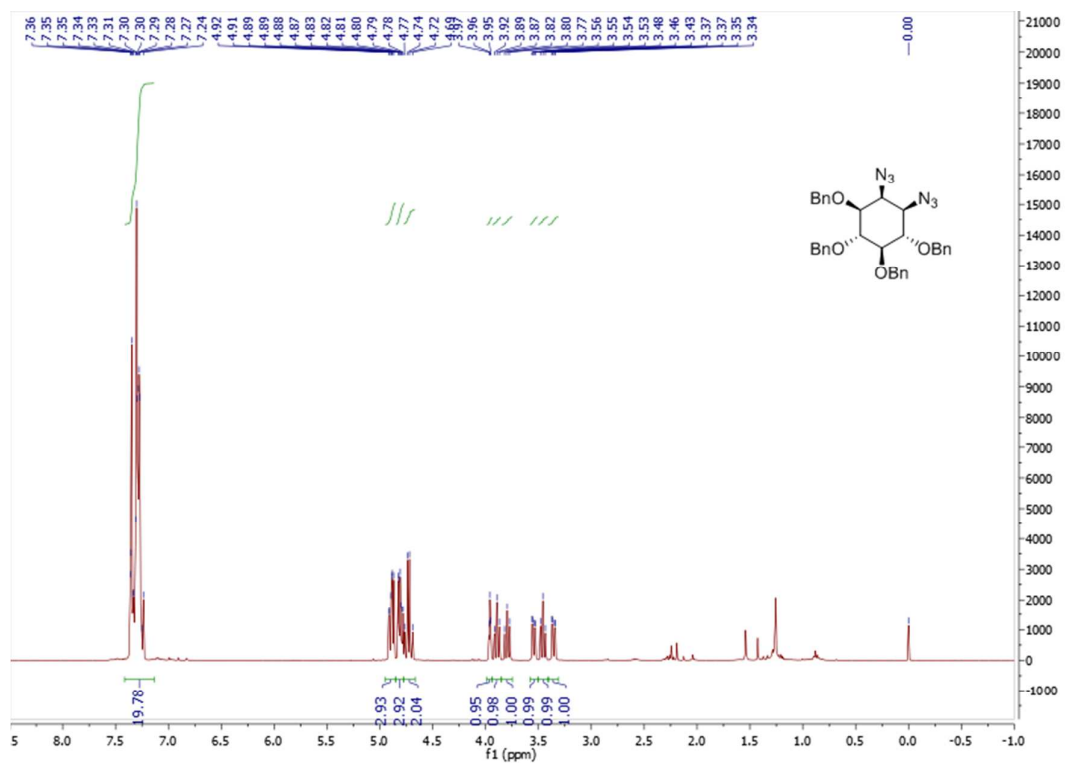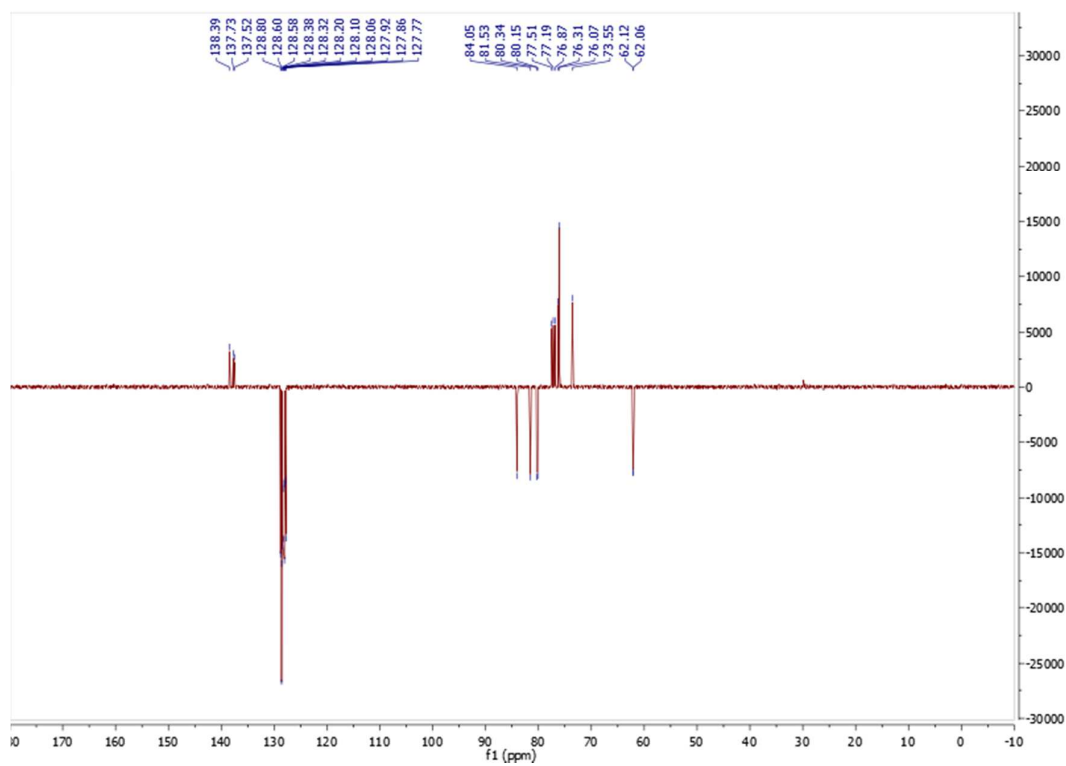

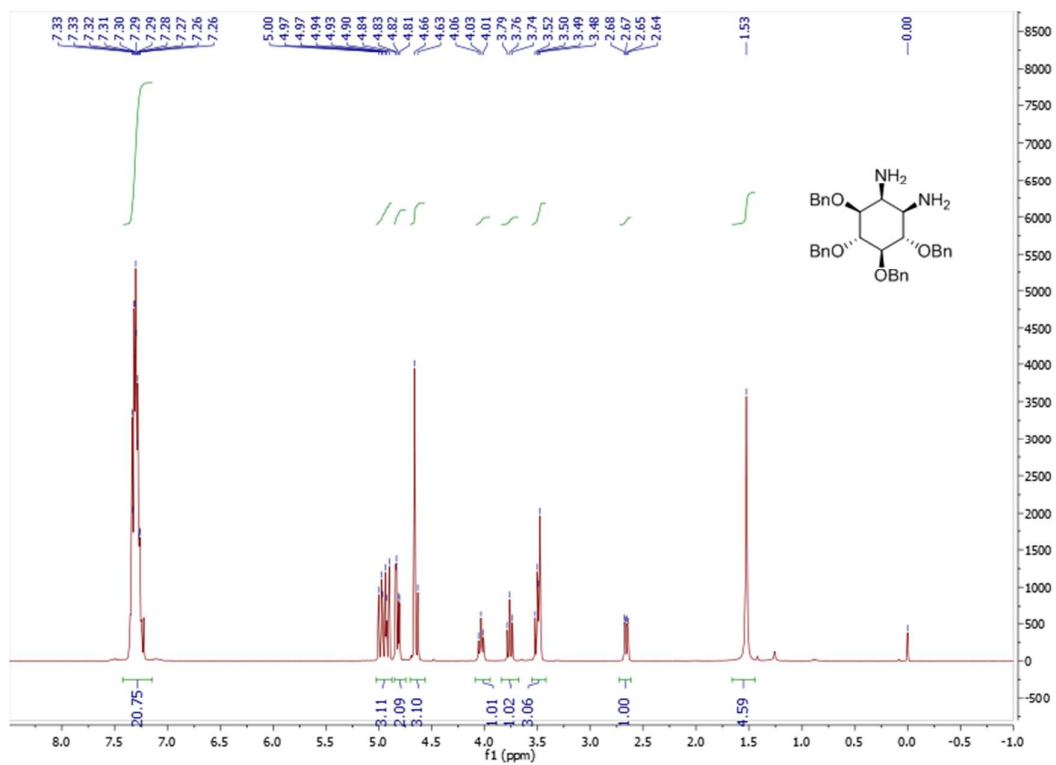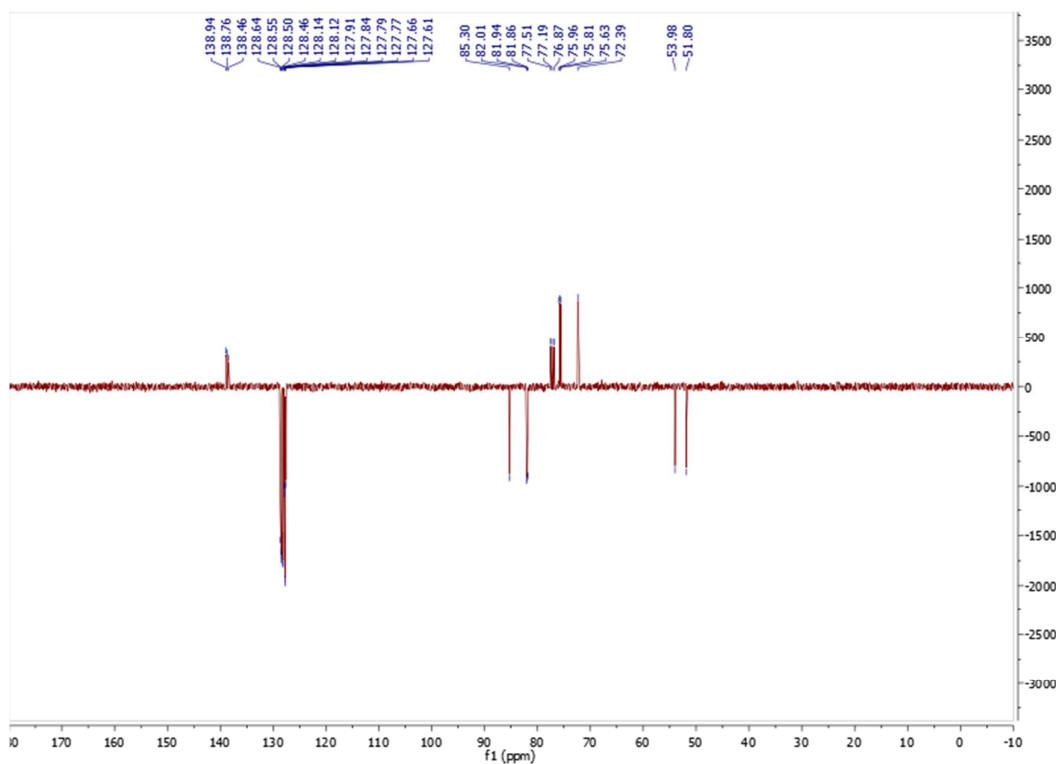

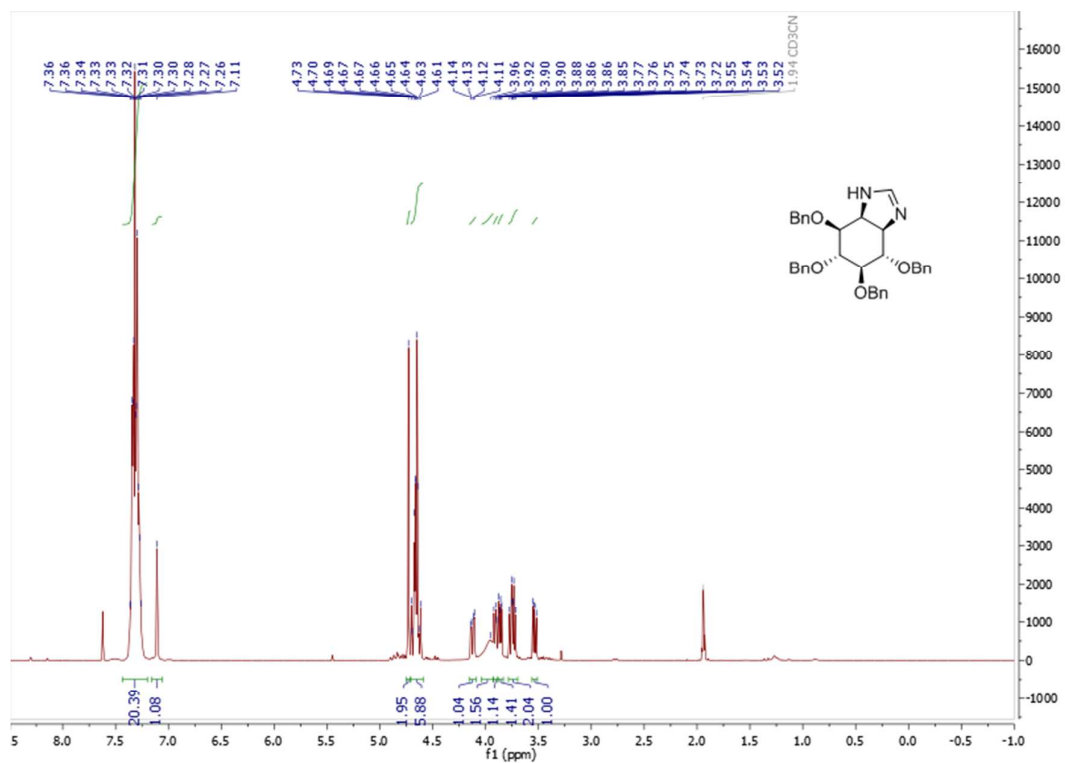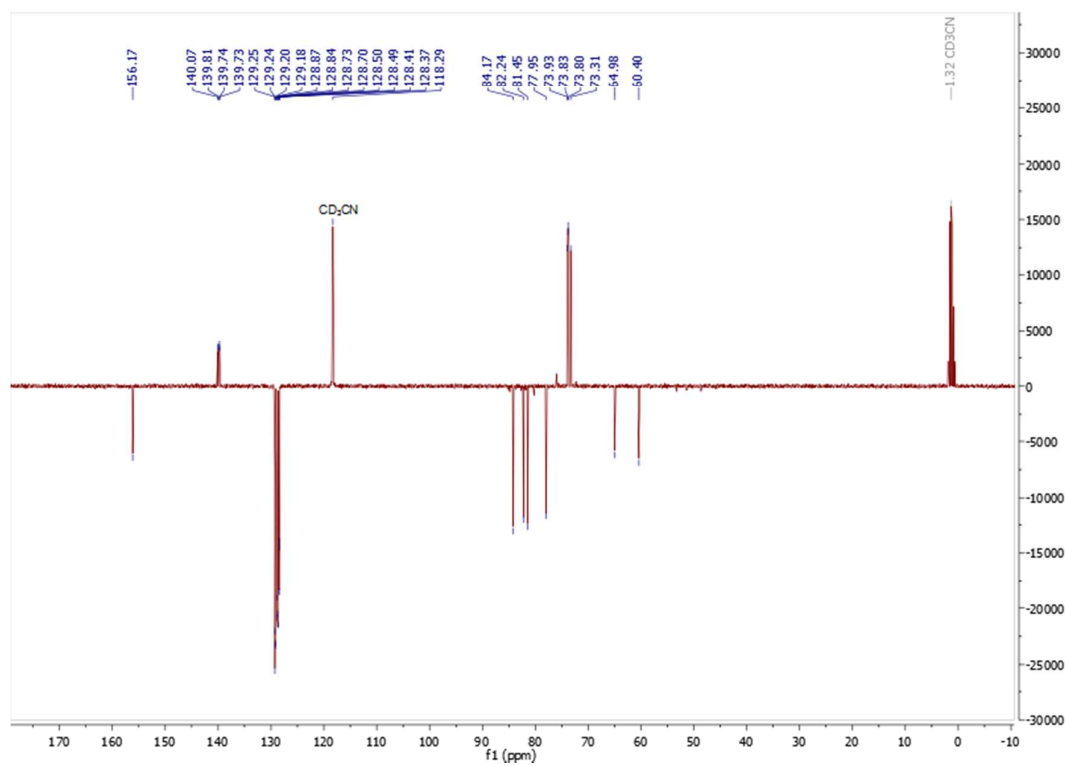

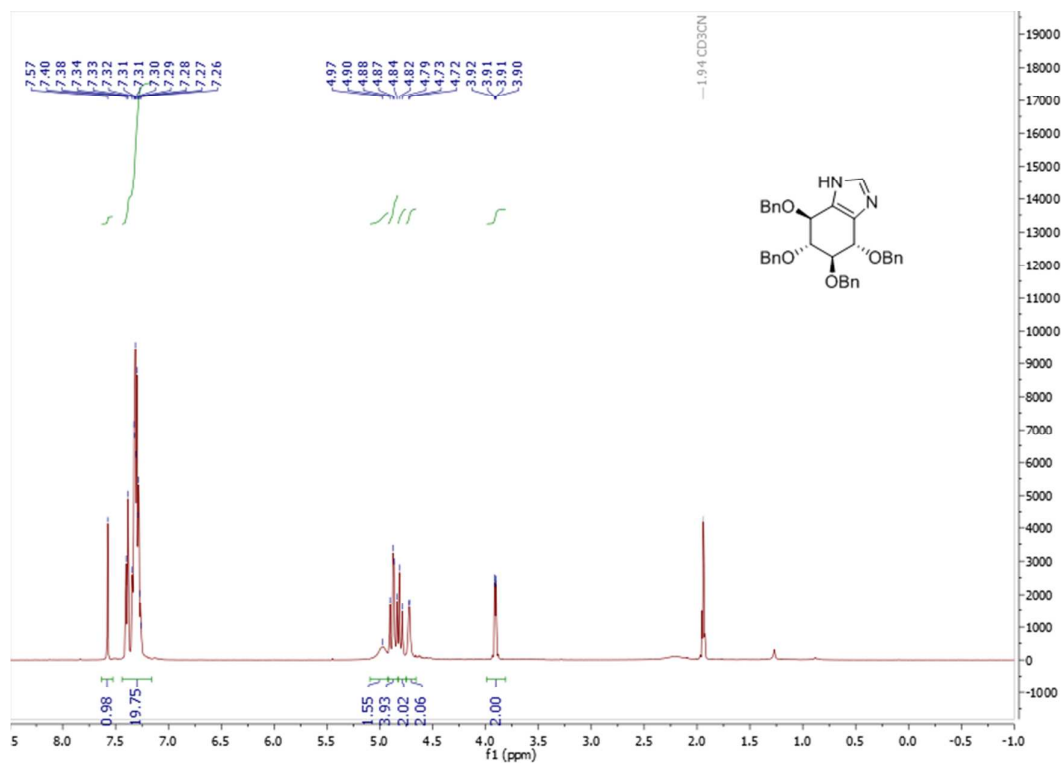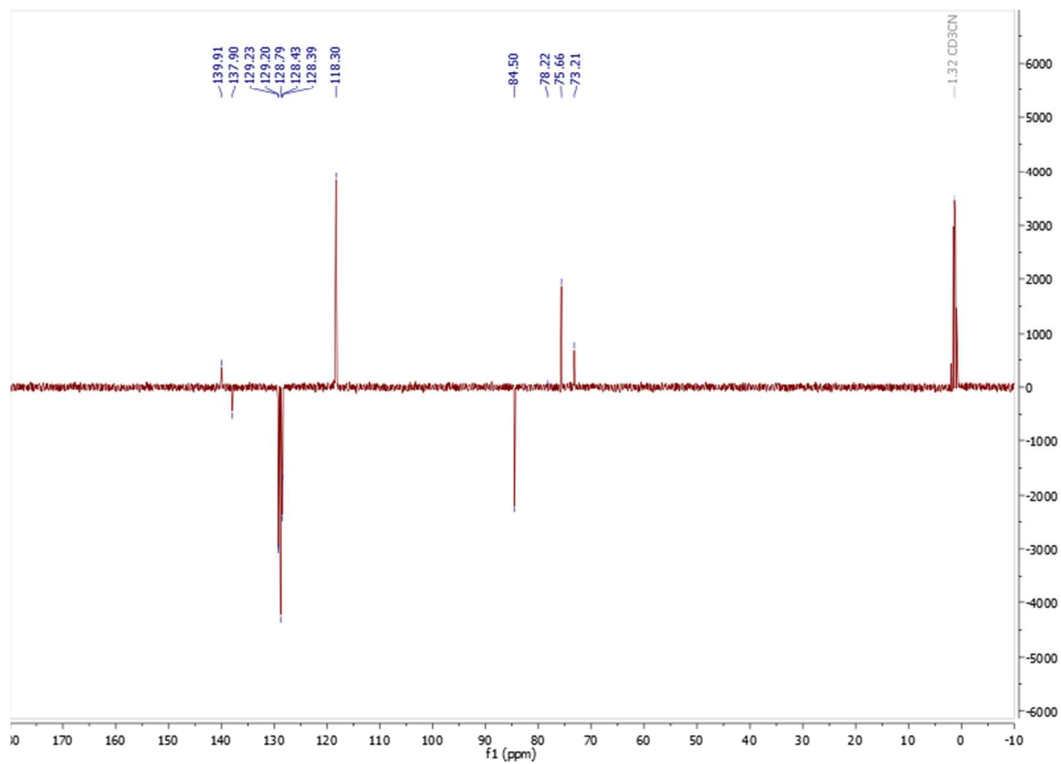



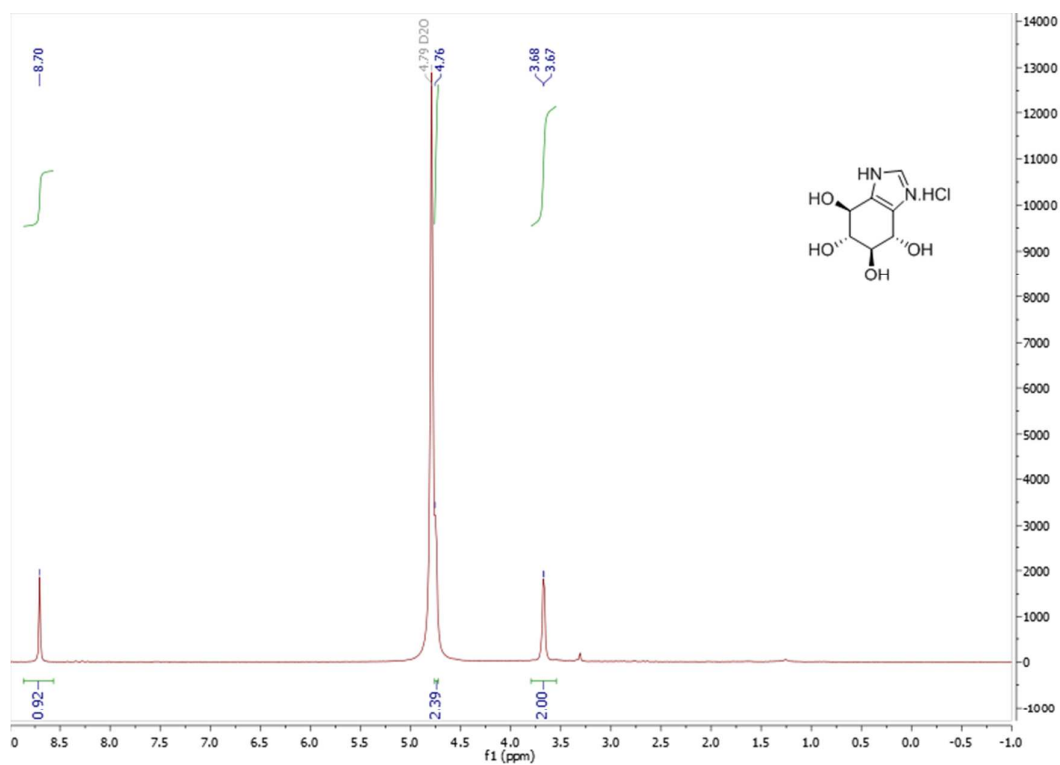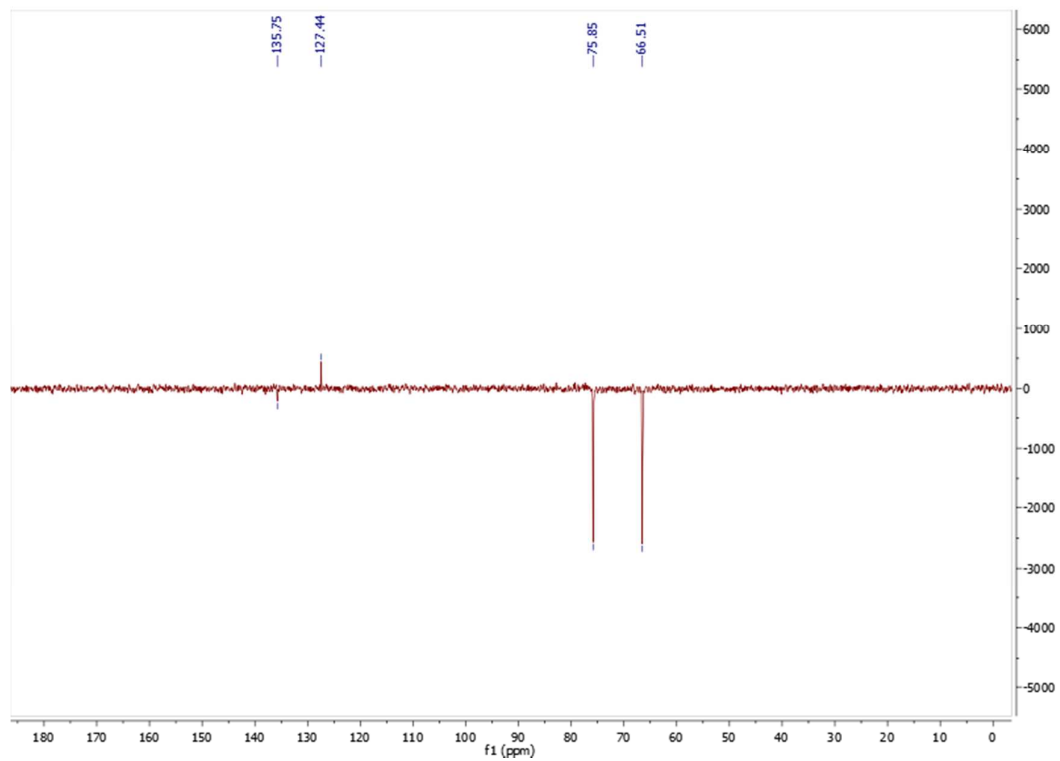

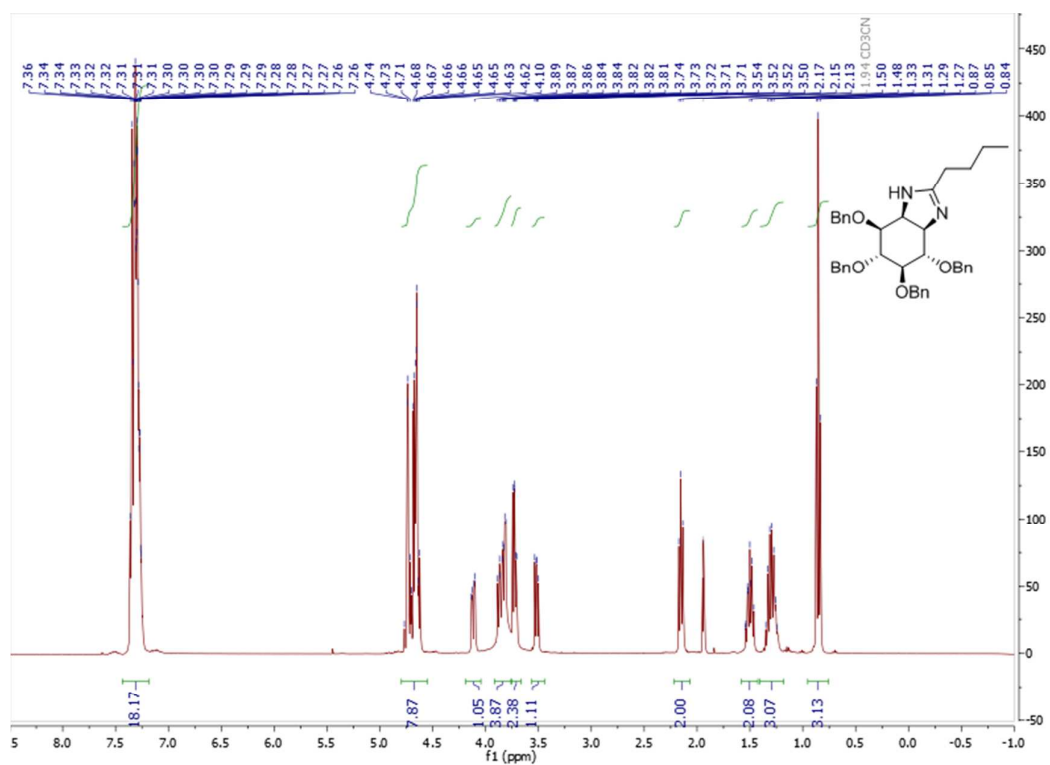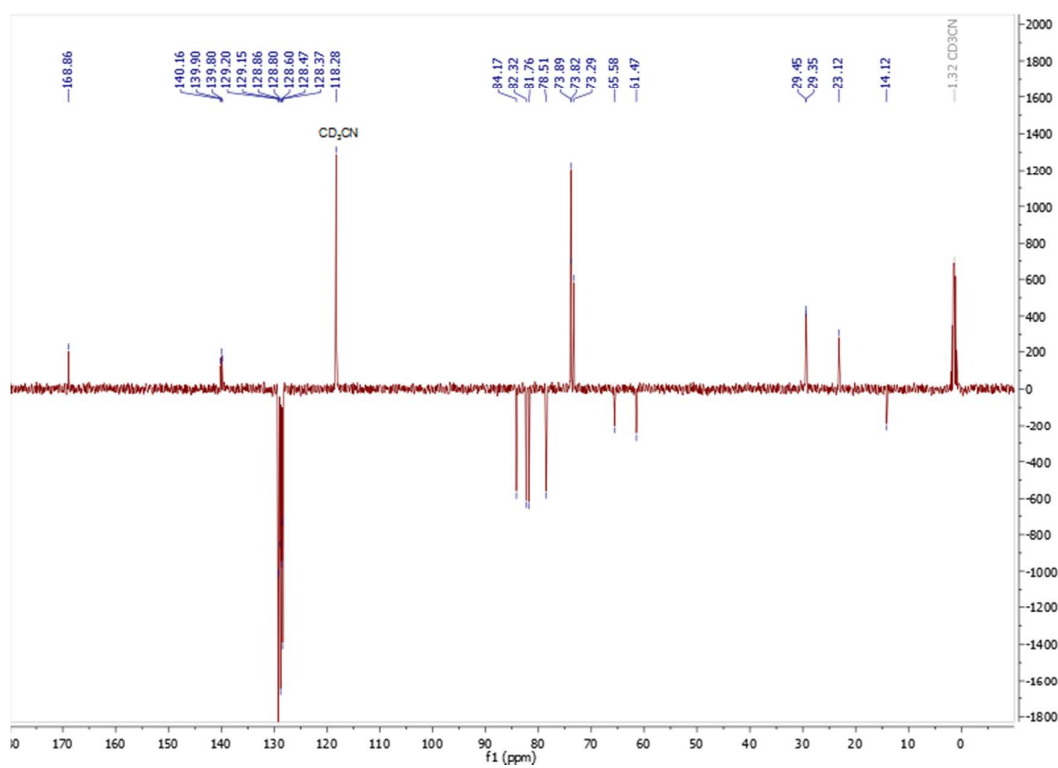

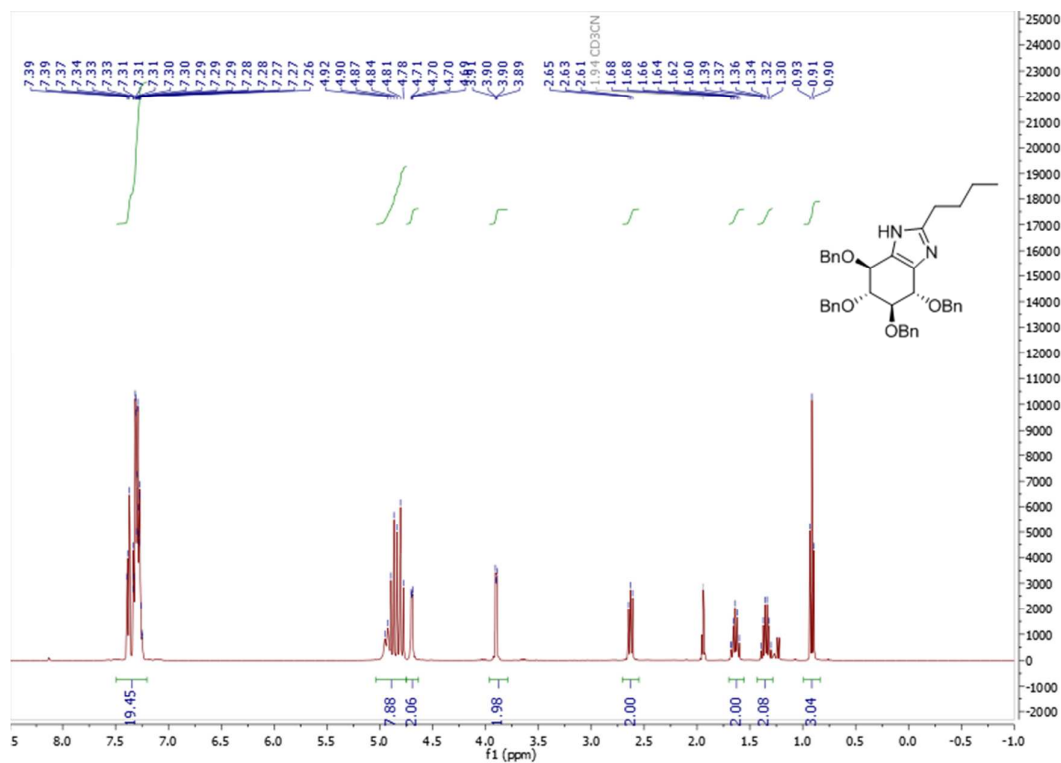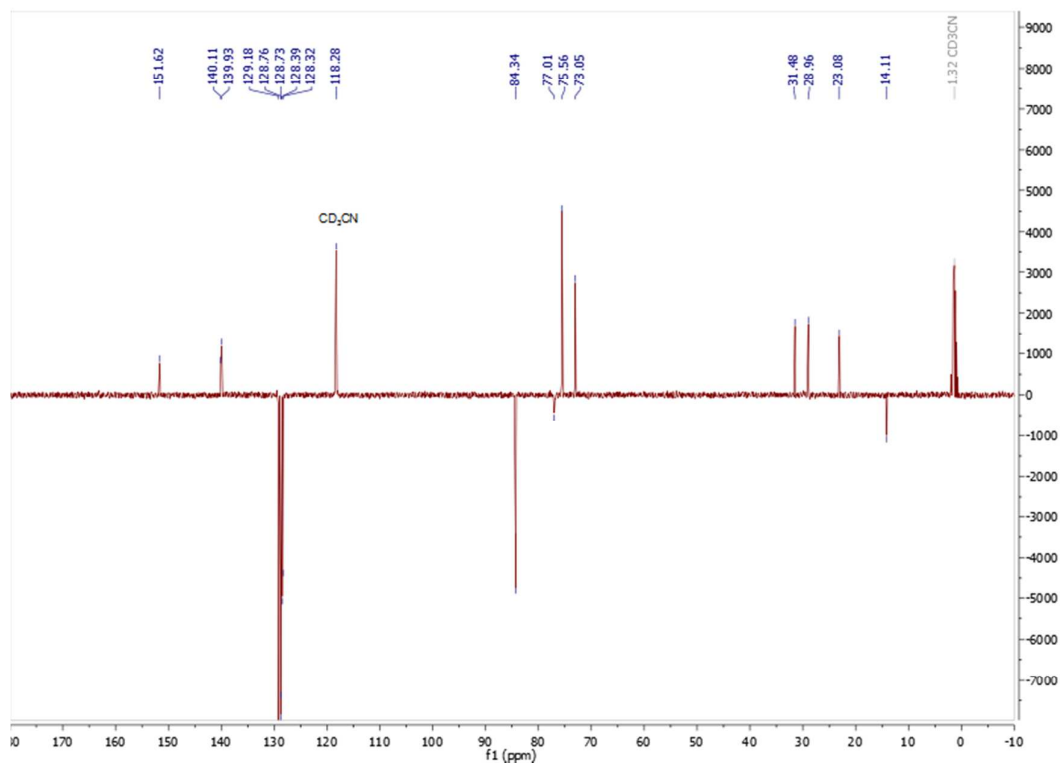

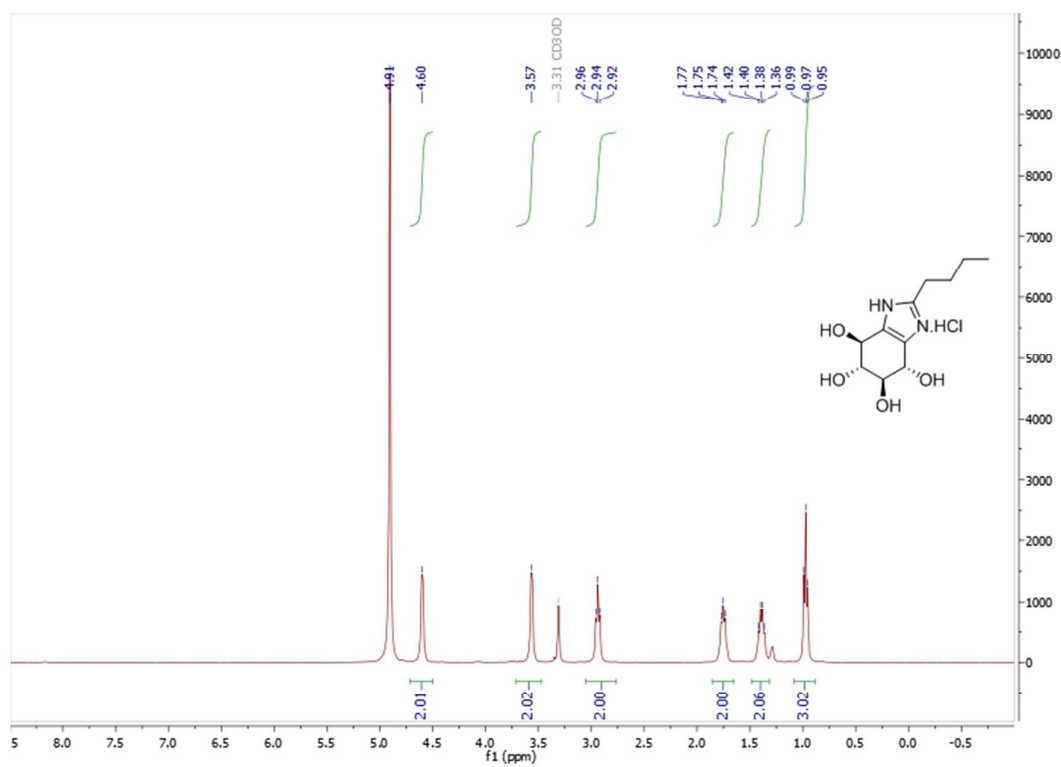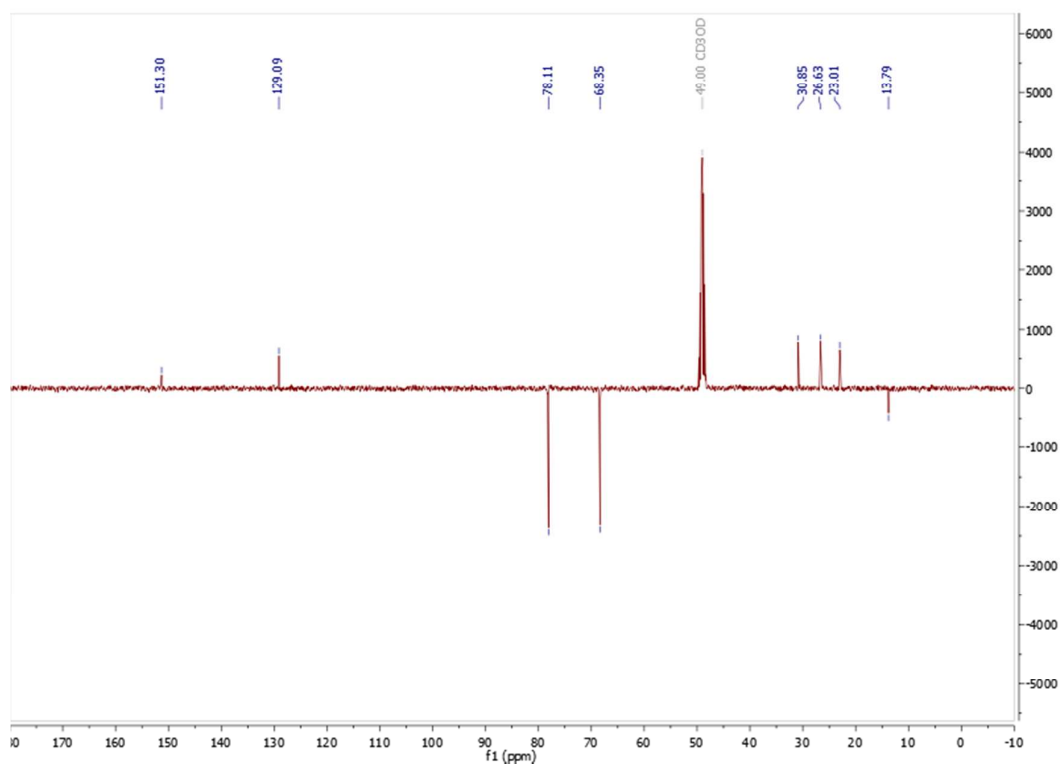

### $pK_{AH}$ determination

The  $pK_{AH}$  of the imidazoles were determined with the method described by Gift *et al.*<sup>[8]</sup> using a Metrohm 691 pH-meter and Hamilton spintrode. The compound was dissolved in  $D_2O$  (0.6 mL) and basified with NaOD (0.1 M in  $D_2O$ ) to pH > 8. Then, the mixture was acidified by stepwise addition of DCI (0.1 M in  $D_2O$ ) and a  $^1H$ -NMR spectrum (Brüker DMX-300) was recorded after each addition. A correction for determination in  $D_2O$  instead of  $H_2O$  was applied according to Krężel *et al.*<sup>[9]</sup>

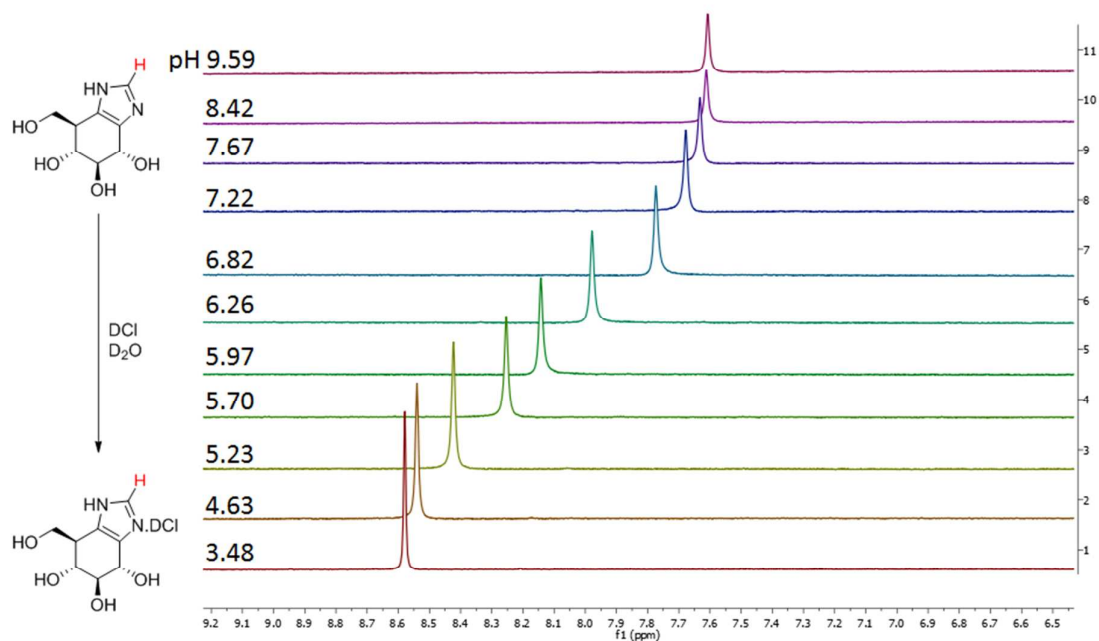

### gluco-1*H*-imidazole

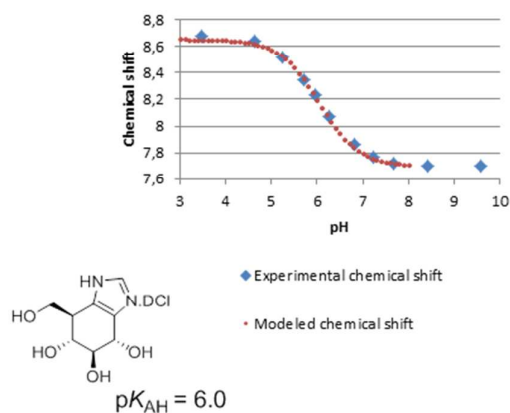

**Figure S1**  $pK_{AH}$  determination of gluco-1*H*-imidazole by  $^1H$ -NMR.

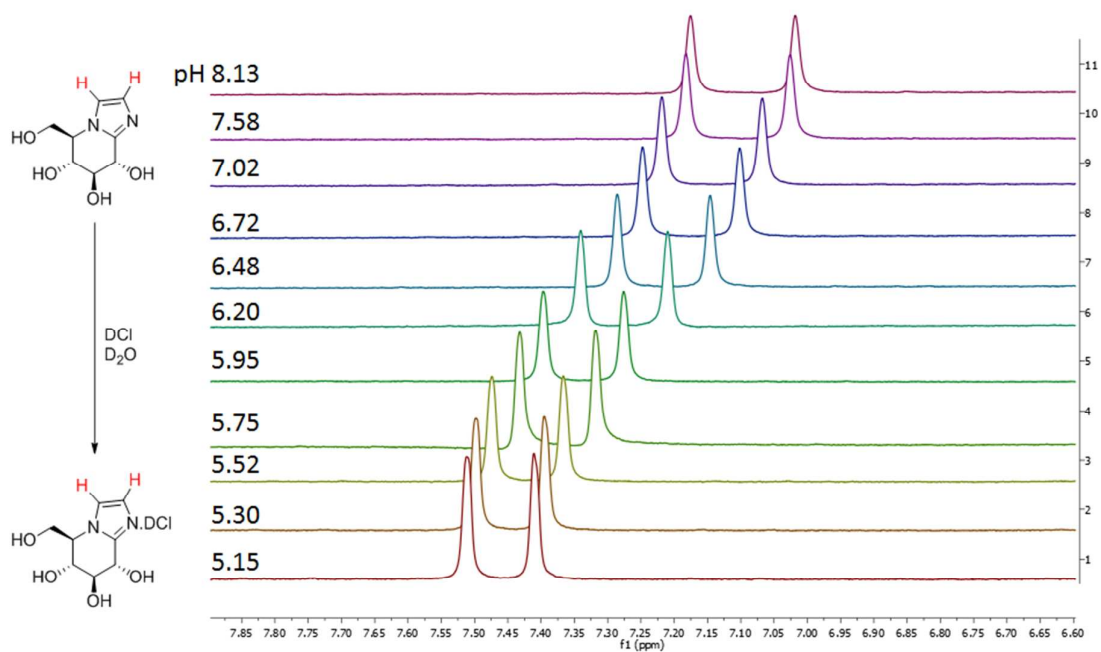

**glucoimidazole**

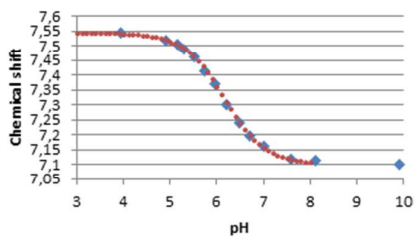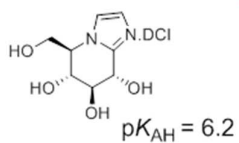

Figure S2  $\text{pK}_{\text{AH}}$  determination of glucoimidazole by  $^1\text{H-NMR}$ .

## Determination of kinetic constant ( $K_i$ ) values

### Biochemical and Biological Methods

Enzyme preparations used for  $IC_{50}$  and kinetics measurements were as follows: Recombinant human  $\beta$ -glucosidase GBA1 (Cerezyme) and  $\alpha$ -glucosidase recombinant human GAA (Myozyme) were obtained from Genzyme, USA. Bacterial  $\beta$ -glucosidase enzymes *TmGH1*<sup>[10]</sup> and *TxGH116*<sup>[11]</sup> were expressed as previously described.  $\beta$ -Glucosidase from almonds was purchased from Sigma Aldrich as lyophilized powder (7.9 U/mg solid). Cellular homogenates of a stable HEK293 over-expressing GBA2 cell line were obtained as previously described<sup>[12]</sup> and were pre-incubated for 30 min with 1mM CBE. Proteins were stored in small aliquots at -80 °C until use. *p*-nitrophenyl- $\beta$ -D-glucopyranoside was purchased from Sigma Aldrich, 4-MU- $\beta$ -d-glucopyranoside was purchased from Glycosynth, and C6-NBD-ceramide (6-[N-methyl-N-(7-nitrobenz-2-oxa-1,3-diazol-4-yl)aminododecanoyl]sphingosine) from Molecular probes, GBA1 inhibitor Conduritol- $\beta$ -Epoxide (CBE) was purchased from Enzo. 2,4-dinitrophenyl- $\beta$ -D-glucopyranoside<sup>[13]</sup> and 2,4-dinitrophenyl- $\alpha$ -D-glucopyranoside<sup>[14]</sup> were synthesized following synthetic procedures previously described and their spectroscopic data are in agreement with those previously reported.

### *In vitro* apparent $IC_{50}$ measurements

To determine *in vitro* apparent  $IC_{50}$  values, 25  $\mu$ L of enzyme solution was pre-incubated with 25  $\mu$ L of a range of 6 inhibitor dilutions for 30 min in a 96 well plate, using the following buffers: GBA1 in 150 mM McIlvaine buffer pH 5.2, 0.2% taurocholate (w/v), 0.1% Triton X-100 (v/v) and 0.1% bovine serum albumin (BSA) (w/v); GAA in 150 mM McIlvaine buffer pH 4.8 and 0.1% BSA (w/v); *TmGH1*, *TxGH116* and  $\beta$ -glucosidase from sweet almonds in 50 mM NaHPO<sub>4</sub> pH 6.8 and 0.1% BSA (w/v).

After 30 min of pre-incubation, 50  $\mu$ L of substrate solution in the same buffer was added to this E (25  $\mu$ L) + I (25  $\mu$ L) mixture (total reaction volume 100  $\mu$ L). GBA1 residual activity was measured using final 24 nM concentration of enzyme (Cerezyme) and 200  $\mu$ M of 2,4-dinitrophenyl- $\beta$ -D-glucopyranoside substrate, incubated for 30 min at 37 °C. GAA activity was measured using final concentrations of 156 nM and 200  $\mu$ M of 2,4-dinitrophenyl- $\alpha$ -D-glucopyranoside substrate, for 30 min at 37 °C. *TmGH1*, *TxGH116* and  $\beta$ -glucosidase from sweet almonds residual activity was measured using final concentrations of 37 nM, 82 nM and 0.125 U/mL respectively and 400  $\mu$ M of *p*-nitrophenyl- $\beta$ -D-glucopyranoside, for 30 min at 37 °C. Finally, all enzyme reactions were monitored for 10 minutes and the release of 2,4-dinitrophenolate or *p*-nitrophenolate and UV-absorbance was measured at 420 nm in a Tecan GENios Microplate Reader. Values plotted for [I] are those in the final reaction mixture, containing E + I + S. Data was corrected for background absorbance, then normalized to the untreated control condition and finally curve-fitted via one phase exponential decay function (GraphPad Prism 5.0). Apparent *in vitro*  $IC_{50}$  values were determined in technical triplicates.

For GBA2, 12.5  $\mu$ L of lysate was pre-incubated with 12.5  $\mu$ L of a range of 7 inhibitor dilutions for 30 min at 37°C. Afterwards, 100  $\mu$ L of 3.7 mM 4-MU- $\beta$ -D-glucopyranoside in 150 mM McIlvaine buffer pH 5.8 and 0.1% BSA (w/v) were added and incubated for 1h at 37°C. After stopping the substrate reaction with 200  $\mu$ L 1M NaOH-Glycine (pH 10.3), liberated 4-MU fluorescence was measured with a fluorimeter LS55 (Perkin Elmer) using  $\lambda_{\text{Ex}}$  366 nm and  $\lambda_{\text{Em}}$  445 nm. All IC<sub>50</sub> values were determined in duplicate.

### ***In situ* apparent IC<sub>50</sub> measurements**

IC<sub>50</sub> values for GCS were determined with NBD-ceramide as substrate as previously described<sup>[15]</sup>. RAW 264.7 (American Type culture collection) were cultured in RPMI medium (Gibco) supplemented with 10% FCS, 1 mM GlutaMAX™ and 100 units/mL penicillin/streptomycin (Gibco) at 37°C and 5% CO<sub>2</sub>. The RAW 264.7 cells were grown to confluence in 12-well plates and pre-incubated for 1h with 300  $\mu$ M CBE, followed by 1h incubation at 37°C in the presence of a range of 6 inhibitor concentrations and with 1 nmol C6-NBD-ceramide. The cells were washed 3x with PBS and harvested by scraping. After lipid extraction<sup>[16]</sup>, the C6-NBD lipids were separated and detected by HPLC ( $\lambda_{\text{Ex}}$  470 nm and  $\lambda_{\text{Em}}$  530 nm). IC<sub>50</sub> values were determined in duplicate from the titration curves of observed formed C6-NBD-glucosylceramide.

**Table S1** – Apparent IC<sub>50</sub> values in  $\mu$ M for azoles 5-9.

|          | <i>TmGH1</i> | <i>TxGH116</i> | Sweet almonds | GBA1  | GBA2 | GCS  | GAA   |
|----------|--------------|----------------|---------------|-------|------|------|-------|
| <b>6</b> | 107          | 93             | 14            | 6.1   | > 50 | > 50 | > 100 |
| <b>7</b> | 9.8          | 72             | 0.042         | 0.069 | > 50 | > 50 | > 100 |
| <b>8</b> | > 100        | > 100          | > 100         | 21.8  | > 50 | > 50 | > 100 |
| <b>9</b> | > 100        | > 100          | 0.350         | 0.192 | > 50 | > 50 | > 100 |
| <b>5</b> | 0.014        | 0.165          | 0.065         | 0.050 | > 50 | > 50 | > 100 |

All reported values are the mean from two or three technical replicates.

### **Kinetic studies**

The kinetic studies of reversible imidazole inhibitors in *TmGH1*, *TxGH116* and  $\beta$ -glucosidase from sweet almonds were performed by monitoring the UV-absorbance of *p*-nitrophenolate released from *p*-nitrophenyl  $\beta$ -D-glucopyranoside. *TmGH1*, *TxGH116* and  $\beta$ -glucosidase from sweet almonds (25  $\mu$ L) at 37 nM, 82 nM and 0.125 U/mL respectively in 50 mM phosphate buffer (pH 6.8) and 0.1% BSA (w/v) were pre-incubated with a range of inhibitor dilutions (25  $\mu$ L) for 30 min at 37 °C in a 96 well plate. The reaction was then started by adding 50  $\mu$ L of different *p*-nitrophenyl  $\beta$ -D-glucopyranoside substrate concentrations (0.05, 0.1, 0.25, 0.5, 0.75, 1.0, 2.5 and 5 mM) in 50 mM phosphate buffer (pH 6.8) to the 50  $\mu$ L enzyme-inhibitor mixture. For kinetic studies in human recombinant  $\beta$ -glucosidase, 25  $\mu$ L of 24 nM Cerezyme in 150 mM McIlvaine buffer pH 5.2 supplemented with 0.2% taurocholate (w/v), 0.1% Triton X-100 (v/v) and 0.1% bovine serum albumin (BSA) (w/v), was incubated with a range of inhibitor dilutions (25  $\mu$ L) for 30 min at 37 °C in a 96 well plate. The reaction was then started by adding 50  $\mu$ L of different 2,4-dinitrophenyl- $\alpha$ -D-glucopyranoside



substrate concentrations (0.05, 0.1, 0.2, 0.3, 0.4, 0.5, 0.6 and 0.7 mM) in the previously described 150 mM McIlvaine buffer (pH 5.2) to the 50  $\mu$ L enzyme-inhibitor mixture.

The release of *p*-nitrophenolate or 2,4-dinitrophenolate was monitored by absorbance at 420 nm for 10 min (at 25 °C for *TmGH1*, *TxGH116* and  $\beta$ -Glucosidase from almonds or 37 °C for human Cerezyme and Myozyme) in a Tecan GENios Microplate Reader to determine the hydrolysis rate. The  $K_i$  values of reversible competitive or linear mixed inhibition were determined by Michaelis-Menten model using standard nonlinear regression (GraphPad Prism 5.0).  $K_i$  values were determined in technical triplicates.

## Protein expression and crystallography

### *TmGH1*

*TmGH1* was produced by expression of the construct pET-28a-*TmGH1*-His<sub>6</sub> and purified as described by Zechel *et al.*<sup>[17]</sup> *TmGH1* was crystallized by sitting drop vapour diffusion, with the protein at 10 mg/ml in 50 mM imidazole pH 7.0 and the well solution comprised of 11 % polyethylene glycol (PEG) 4000, 0.1 M imidazole pH 7.0, 50 mM calcium acetate, 100 mM trimethylamine *N*-oxide. The protein drop was seeded with a seed stock grown under similar conditions. To generate the ligand complex, a crystal of *TmGH1* was soaked with 10 mM gluco-1*H*-imidazole **6** for 4 days, and fished into liquid nitrogen via a cryoprotectant solution comprised of the well solution supplemented with 25 % (v/v) ethylene glycol. Data were collected at Diamond beamline I03, processed using *DIALS*<sup>[18]</sup> and scaled using *AIMLESS*<sup>[19]</sup> to a resolution of 1.7 Å. The structure was solved using 1OD0 without the water molecules as the starting model for *REFMAC*<sup>[20]</sup>, and refined by manual rebuilding in *Coot*<sup>[21]</sup> combined with further cycles of refinement using *REFMAC*. Crystal structure figures were generated using Pymol.

There are two molecules in the asymmetric unit of the *TmGH1* crystal structure. **6** is modelled in the active site of chain B only at an occupancy of 0.8, whilst the equivalent site in chain A has been modelled with ethylene glycol in two alternative conformations and two water molecules. The authors have observed that crystal structures of ligand complexes obtained with *TmGH1* crystals sometimes yield ligand in only one out of two molecules in the asymmetric unit. It may be that some of the active sites are blocked by N-terminal residues on adjacent chains, as observed for 1OD0.pdb (where 5 residues at the start of chain B extend into the active site of mol A), but for this complex it has not been possible to definitively model N-terminal residues before Val3.

### *TxGH116*

*TxGH116* was produced by expression of construct pET30a-*TxGH116*  $\Delta$ 1-18 with a C-terminal His<sub>6</sub> tag and purified as described by Charoenwattanasatien *et al.*<sup>[22]</sup> *TxGH116* was crystallized by the sitting drop vapour diffusion method, with a well solution of 0.2M ammonium sulfate, 20 % (v/v) PEG 3350,

0.1 M Bis-Tris pH 6.8. To generate ligand complexes, crystals of TxGH116 were soaked with 10 mM gluco-1H-imidazole **6** for 20 hours, before fishing via a cryoprotectant solution with 25 % (v/v) ethylene glycol. Data were collected at Diamond beamline I03, processed using *DIALS* and scaled using *AIMLESS* to a resolution of 2.1 Å. The structure was solved using *MOLREP*<sup>[23]</sup>, with 5BVU as the model, and the solved structure refined by cycles of manual rebuilding in *Coot* and refinement using *REFMAC*. Crystal structure figures were generated using Pymol.

**Table S2** - Data collection and refinement statistics

|                                        | <i>TmGH1</i>                                    | <i>TxGH116</i>                      |
|----------------------------------------|-------------------------------------------------|-------------------------------------|
| <b>Data collection</b>                 |                                                 |                                     |
| Space group                            | <i>P2<sub>1</sub>2<sub>1</sub>2<sub>1</sub></i> | <i>P2<sub>1</sub>2<sub>1</sub>2</i> |
| Cell dimensions                        |                                                 |                                     |
| <i>a, b, c</i> (Å)                     | 94.3, 94.6, 113.4                               | 177.6, 54.1, 83.6                   |
| $\alpha, \beta, \gamma$ (°)            | 90.0, 90.0, 90.0                                | 90.0, 90.0, 90.0                    |
| Resolution (Å)                         | 72.77-1.70 (1.73-1.70)                          | 8.97-2.10 (2.16-2.10)               |
| $R_{\text{sym}}$ or $R_{\text{merge}}$ | 0.080 (2.894)                                   | 0.152 (0.692)                       |
| $R_{\text{pim}}$                       | 0.023 (0.831)                                   | 0.104 (0.462)                       |
| $CC_{1/2}$                             | 0.998 (0.610)                                   | 0.957 (0.596)                       |
| <i>I</i> / $\sigma$ <i>I</i>           | 13.8 (1.5)                                      | 5.0 (1.5)                           |
| Completeness (%)                       | 100.0 (99.8)                                    | 98.4 (97.7)                         |
| Redundancy                             | 12.6 (12.9)                                     | 3.0 (3.1)                           |
| <b>Refinement</b>                      |                                                 |                                     |
| No. reflections                        | 111884                                          | 47048                               |
| $R_{\text{work}} / R_{\text{free}}$    | 0.19/0.22                                       | 0.20/0.25                           |
| No. atoms                              |                                                 |                                     |
| Protein                                | 7231                                            | 6111                                |
| Ligand/ion                             | 60                                              | 52                                  |
| Water                                  | 369                                             | 268                                 |
| <i>B</i> -factors                      |                                                 |                                     |
| Protein                                | 37.5                                            | 26.4                                |
| Ligand/ion                             | 39.5                                            | 30.7                                |
| Water                                  | 42.4                                            | 29.3                                |
| R.m.s deviations                       |                                                 |                                     |
| Bond lengths (Å)                       | 0.018                                           | 0.016                               |
| Bond angles (°)                        | 1.77                                            | 1.71                                |
| Ramachandran plot residues             |                                                 |                                     |
| In most favorable regions (%)          | 98.3                                            | 95.8                                |
| In allowed regions (%)                 | 1.5                                             | 3.7                                 |
| PDB code                               | 5OSS                                            | 5OST                                |

## Electron density and B-factor comparisons for complexes of **5** and **6**

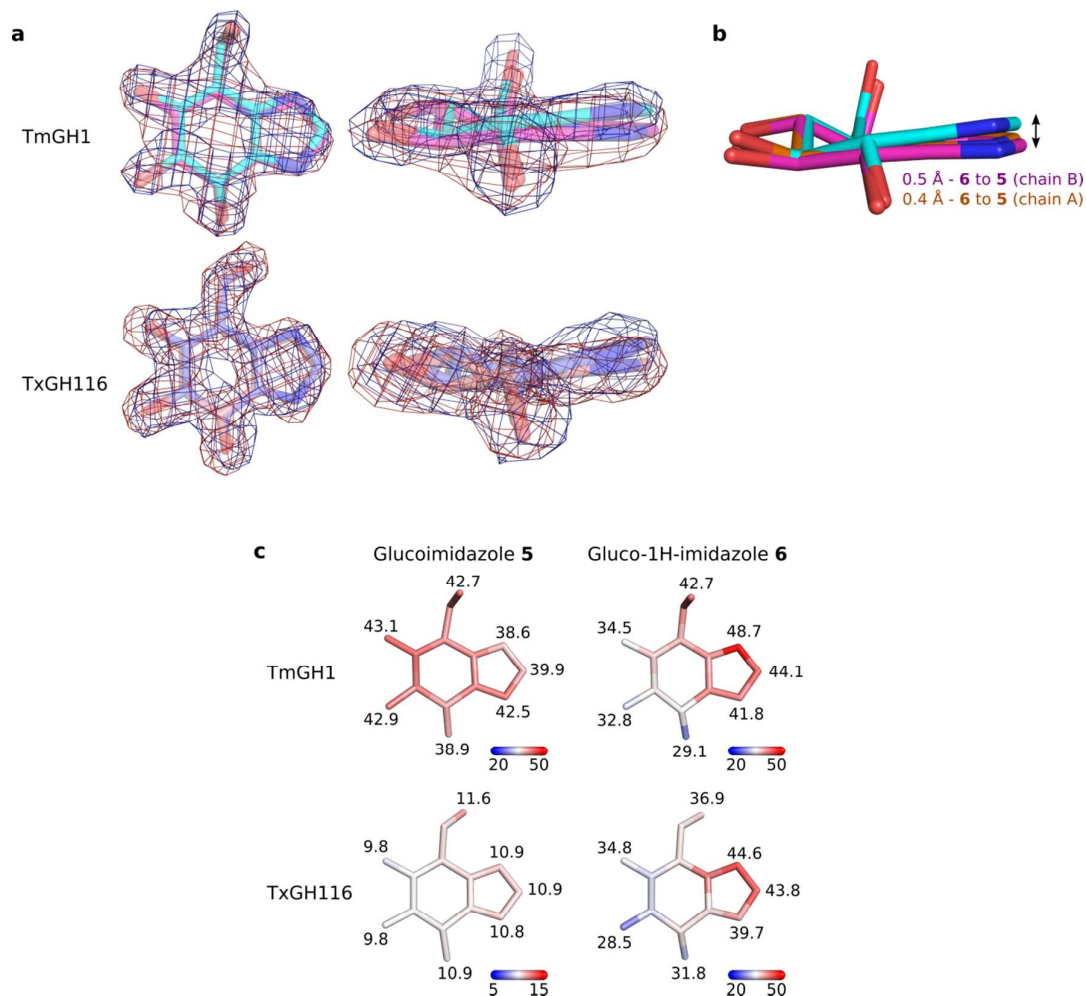

**Figure S3** Electron density and B-factor comparisons for complexes of **5** and **6** in complex with *TmGH1* (pink ligand for **5**, cyan for **6**; chain B of each structure) and *TxGH116* (salmon for **5**, blue for **6**). The small ‘upwards’ shift at the apical carbon of the imidazole in complexes of **6** compared to **5** is well supported by the diverging electron densities at this region. In contrast, electron densities overlay well in the ‘glucose’ portion of the ligands. Densities shown are REFMAC maximum-likelihood/ $\sigma_A$  weighted  $2F_o - F_c$  contoured between 1.5–2.0 r.m.s.d (0.38–0.48  $e/\text{Å}^3$  for *TmGH1-5*, *TmGH1-6*, *TxGH116-6*; 0.89  $e/\text{Å}^3$  for *TxGH116-5*). **b** Superposition of *TmGH1-6* (cyan), against **5** from chains A (orange) and B (pink) of the *TmGH1-5* complex. **6** shows a clear ‘upwards’ shift compared to both molecules of **5**, which overlay well with each other. **c** Ligands in complex with *TmGH1* and *TxGH116* colored by B-factor, with B-factors of peripheral atoms annotated. B-factors increase substantially towards the imidazole portion of **6** in both *TmGH1* and *TxGH116* complexes, indicating greater crystallographic disorder at this region of the ligand. B-factors are more consistent in complexes with **5**. The *TmGH1-5* ligand shown is from chain B; the ligand from chain A shows a similar B-factor trend.

## ITC

ITC experiments were carried out using a MicroCal AutoITC200 (Malvern Instruments, formerly GE Healthcare). All titrations were run at 25 °C in 50 mM Sodium Phosphate, pH 5.8 or 6.8. Proteins were buffer exchanged into ITC buffer via at least 3 rounds of dilution/concentration using an Amicon Ultra spin concentrator (Millipore), and further degassed under vacuum prior to use. Cell concentrations of 100  $\mu$ M (protein) and syringe concentrations of 2 mM (ligand) were used for titrations using glucosyl-1H-imidazoles **6** and **7**. Cell concentrations of 50  $\mu$ M and syringe concentrations of 500  $\mu$ M were used for titrations using **5**. Analyses were carried out using the MicroCal PEAQ-ITC analysis software (Malvern Instruments).

**Table S3** ITC calculated parameters of binding for **5-7** with *TmGH1* or *TxGH116* at pH 5.8 or 6.8.

| pH 6.8                             | <i>TmGH1</i>    |                 |                   | <i>TxGH116</i>   |                 |                   |
|------------------------------------|-----------------|-----------------|-------------------|------------------|-----------------|-------------------|
|                                    | <b>6</b>        | <b>7</b>        | <b>5</b>          | <b>6</b>         | <b>7</b>        | <b>5</b>          |
| N (sites)                          | 0.98 $\pm$ 0.06 | 0.96 $\pm$ 0.2  | 0.96 $\pm$ 0.03   | 0.98 $\pm$ 0.09  | 0.96 $\pm$ 0.02 | 0.98 $\pm$ 0.1    |
| K <sub>D</sub> ( $\mu$ M)          | 28.3 $\pm$ 6.9  | 5.02 $\pm$ 1.0  | 0.14 $\pm$ 0.02   | 27.3 $\pm$ 0.4   | 19.6 $\pm$ 2.6  | 0.075 $\pm$ 0.01  |
| $\Delta$ H (kJmol <sup>-1</sup> )  | -18.4 $\pm$ 1.4 | 14.2 $\pm$ 0.2  | -52.7 $\pm$ 1.2   | -22.5 $\pm$ 0.3  | -7.4 $\pm$ 0.1  | -41.8 $\pm$ 2.3   |
| $-\Delta$ S (kJmol <sup>-1</sup> ) | -7.6 $\pm$ 2.0  | -44.6 $\pm$ 0.7 | 13.6 $\pm$ 1.3    | -3.6 $\pm$ 0.2   | -19.5 $\pm$ 0.4 | 1.04 $\pm$ 2.4    |
| $\Delta$ G (kJmol <sup>-1</sup> )  | -26.0 $\pm$ 0.6 | -30.3 $\pm$ 0.6 | -39.1 $\pm$ 0.34  | -26.1 $\pm$ 0.06 | -26.9 $\pm$ 0.4 | -40.7 $\pm$ 0.47  |
| pH 5.8                             | <i>TmGH1</i>    |                 |                   | <i>TxGH116</i>   |                 |                   |
|                                    | <b>6</b>        | <b>7</b>        | <b>5</b>          | <b>6</b>         | <b>7</b>        | <b>5</b>          |
| N (sites)                          | 0.99 $\pm$ 0.04 | 0.99 $\pm$ 0.09 | 1.02 $\pm$ 0.07   | 1.13 $\pm$ 0.02  | 0.97 $\pm$ 0.01 | 1.04 $\pm$ 0.02   |
| K <sub>D</sub> ( $\mu$ M)          | 36.6 $\pm$ 13.9 | 19.1 $\pm$ 0.9  | 0.055 $\pm$ 0.004 | 12.2 $\pm$ 0.8   | 16.0 $\pm$ 3.4  | 0.032 $\pm$ 0.002 |
| $\Delta$ H (kJmol <sup>-1</sup> )  | -13.1 $\pm$ 0.6 | 17.1 $\pm$ 1.1  | -40.7 $\pm$ 3.9   | -15.4 $\pm$ 0.4  | -2.3 $\pm$ 0.1  | -32.9 $\pm$ 0.4   |
| $-\Delta$ S (kJmol <sup>-1</sup> ) | -12.3 $\pm$ 1.4 | -44.1 $\pm$ 1.2 | -0.79 $\pm$ 4.0   | -12.6 $\pm$ 0.6  | -25.9 $\pm$ 1.1 | -9.9 $\pm$ 0.5    |
| $\Delta$ G (kJmol <sup>-1</sup> )  | -25.4 $\pm$ 0.9 | -26.9 $\pm$ 0.2 | -41.5 $\pm$ 0.17  | -28.1 $\pm$ 0.15 | -26.6 $\pm$ 1.8 | -42.8 $\pm$ 0.21  |

All reported values are the mean  $\pm$  standard deviation from three (ligands **6**, **7**) or four (ligand **5**) technical replicates.

**Representative ITC traces pH 6.8**

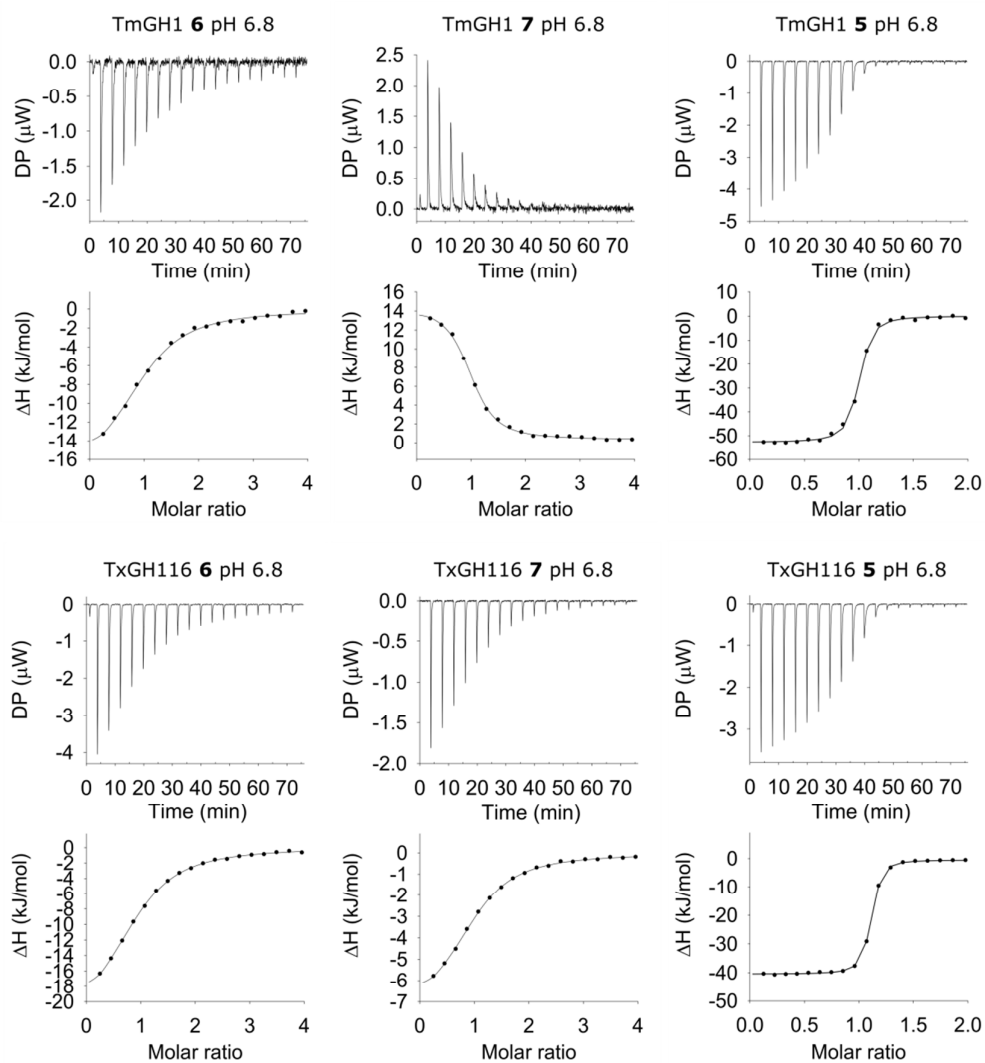

**Figure S4**

**Representative ITC traces pH 5.8**

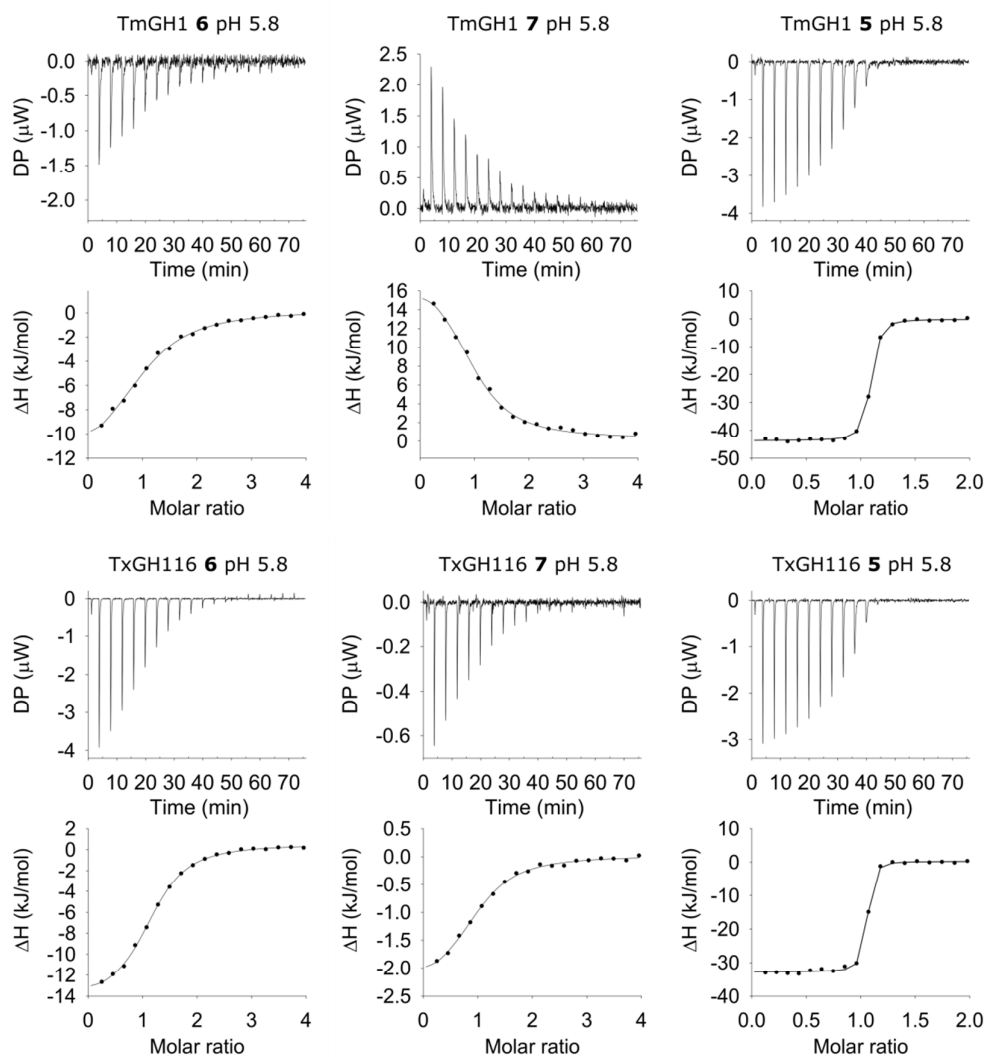

**Figure S5**

## DFT calculations

### Geometry optimization

All calculations were performed with DFT as level of theory in combination with the B3LYP hybrid functional. A conformer distribution search option included in the Spartan 04 program<sup>[24]</sup>, in gas-phase with the use of 6-31G(d) as basis set, was used as starting point for the geometry optimization. All generated structures were further optimized with Gaussian 03<sup>[25]</sup> at 6-311G(d,p). Optimization was done in gas-phase and subsequently corrections for solvent effects were done by the use of a polarizable continuum model using water as solvent parameter. The free Gibbs energy of the computed conformations was calculated using Equation (1) in which  $\Delta E_{gas}$  is the gas-phase energy (electronic energy),  $\Delta G_{RRHO}^T$  (T= 298.15 K and pressure= 1 atm.) is the sum of corrections from the electronic energy to free Gibbs energy in the rigid-rotor-harmonic-oscillator approximation (RRHO) also including zero-point-vibrational energy, and  $\Delta G_{solv}^T$  is their corresponding free solvation Gibbs energy.

$$\begin{aligned}\Delta G_{aq}^T &= \Delta E_{gas} + \Delta G_{gas,RRHO}^T + \Delta G_{solv} \\ &= \Delta G_{gas}^T + \Delta G_{solv}\end{aligned}\quad (1)$$

The denoted free energies include unscaled zero-point vibrational energies. Visualisation of the conformations of interest was done with CYLview.<sup>[25]</sup> The three lowest energy geometries for **6** were all calculated to adopt a  ${}^4H_3$  conformation, differing only in the rotation angle around the C5-C6 axis: *gt*, *gg* and *tg* respectively.

### Gluco-1*H*-imidazole (both tautomers)

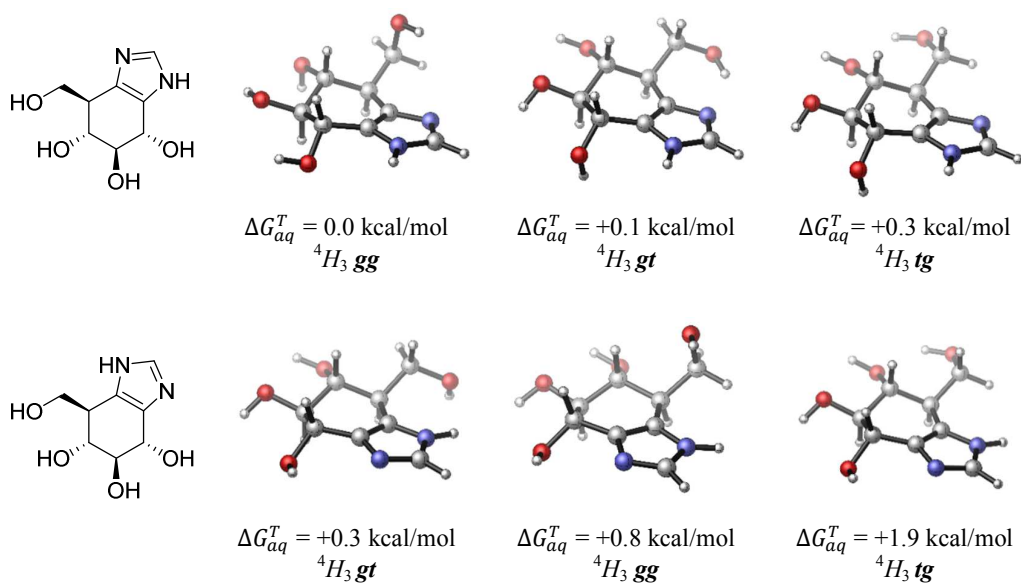

**Gluco-1*H*-imidazole (protonated)**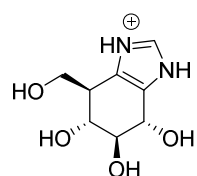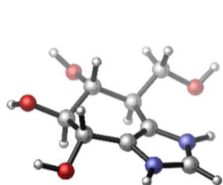

$$\Delta G_{aq}^T = 0.0 \text{ kcal/mol}$$

${}^4H_3gt$

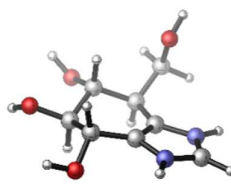

$$\Delta G_{aq}^T = +0.0 \text{ kcal/mol}$$

${}^4H_3gg$

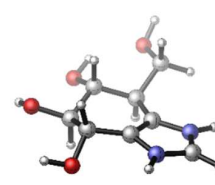

$$\Delta G_{aq}^T = +3.2 \text{ kcal/mol}$$

${}^4H_3tg$

**Glucoimidazole**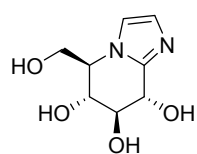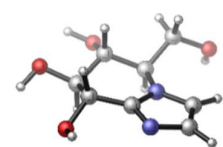

$$\Delta G_{aq}^T = 0.0 \text{ kcal/mol}$$

${}^4H_3gt$

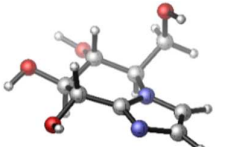

$$\Delta G_{aq}^T = +0.3 \text{ kcal/mol}$$

${}^4H_3gg$

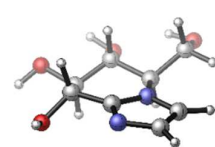

$$\Delta G_{aq}^T = +2.0 \text{ kcal/mol}$$

${}^4H_3tg$

**Glucoimidazole (protonated)**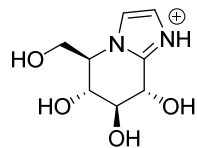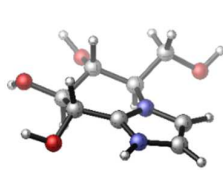

$$\Delta G_{aq}^T = 0.0 \text{ kcal/mol}$$

${}^4H_3gt$

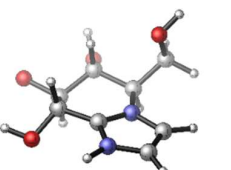

$$\Delta G_{aq}^T = +0.2 \text{ kcal/mol}$$

${}^4H_3gg$

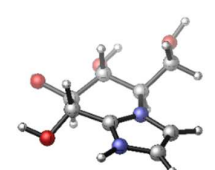

$$\Delta G_{aq}^T = +3.5 \text{ kcal/mol}$$

${}^4H_3tg$



**Mulliken charges**Mulliken atomic charges of lowest energy geometry of **6** (Gluco-1*H*-imidazole)

|             |                 |
|-------------|-----------------|
| 1 C         | 0.061369        |
| 2 C         | 0.104400        |
| 3 C         | 0.042436        |
| <b>4 C</b>  | <b>0.106302</b> |
| 5 C         | -0.195326       |
| 6 C         | 0.055654        |
| 7 H         | 0.143586        |
| 8 H         | 0.136044        |
| 9 H         | 0.121522        |
| 10 H        | 0.125417        |
| 11 N        | -0.429194       |
| 12 N        | -0.386821       |
| <b>13 C</b> | <b>0.145851</b> |
| 14 H        | 0.152469        |
| 15 H        | 0.306533        |
| 16 C        | 0.043782        |
| 17 H        | 0.092401        |
| 18 H        | 0.107852        |
| 19 O        | -0.463283       |
| 20 H        | 0.244617        |
| 21 O        | -0.463231       |
| 22 H        | 0.283708        |
| 23 O        | -0.472542       |
| 24 H        | 0.297766        |
| 25 O        | -0.452488       |
| 26 H        | 0.291176        |

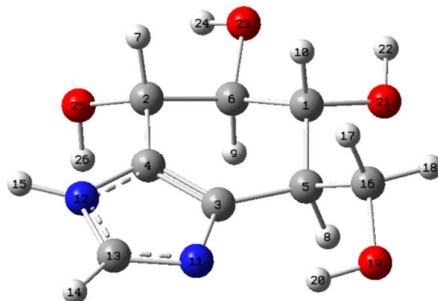Mulliken atomic charges of lowest energy geometry of **6** (Gluco-1*H*-imidazole (protonated))

|            |                 |
|------------|-----------------|
| 1 C        | 0.052501        |
| 2 C        | 0.125295        |
| 3 C        | 0.177257        |
| <b>4 C</b> | <b>0.112704</b> |
| 5 C        | -0.186080       |
| 6 C        | 0.049958        |
| 7 H        | 0.162319        |
| 8 H        | 0.172471        |
| 9 H        | 0.135404        |
| 10 H       | 0.143009        |
| 11 C       | 0.037413        |

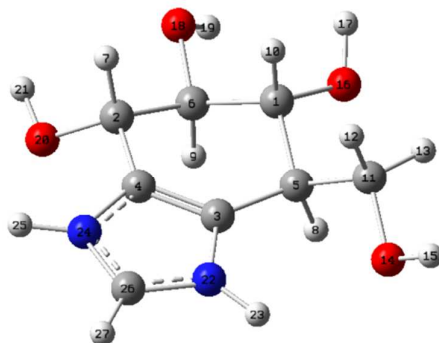

12 H 0.117263  
13 H 0.119184  
14 O -0.475253  
15 H 0.314409  
16 O -0.463192  
17 H 0.302591  
18 O -0.470192  
19 H 0.306331  
20 O -0.462279  
21 H 0.307617  
22 N -0.356638  
23 H 0.319731  
24 N -0.361151  
25 H 0.343516  
**26 C 0.263310**  
27 H 0.212501

Mulliken atomic charges of lowest energy geometry of **5** (Glucoimidazole)

1 C 0.003047  
2 C 0.078107  
3 C 0.007354  
4 C 0.061292  
5 H 0.143840  
6 H 0.168935  
7 H 0.127926  
8 H 0.141160  
9 C 0.017720  
10 H 0.126707  
11 H 0.124005  
12 O -0.453463  
13 H 0.300757  
14 O -0.452985  
15 H 0.293432  
16 O -0.471394  
17 H 0.303466  
18 O -0.463576  
19 H 0.295509  
20 N -0.395317  
**21 C 0.306442**  
22 C -0.000203

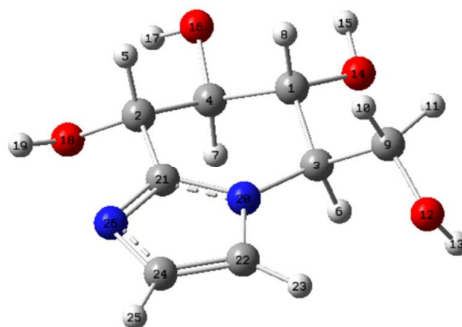

23 H 0.132330  
**24 C -0.117443**  
 25 H 0.125825  
 26 N -0.403472

Mulliken atomic charges of lowest energy geometry of **5** (Glucoimidazole (protonated))

1 C -0.008704  
 2 C 0.083032  
 3 C 0.019480  
 4 C 0.067236  
 5 H 0.186544  
 6 H 0.193093  
 7 H 0.147109  
 8 H 0.159518  
 9 C 0.024460  
 10 H 0.129999  
 11 H 0.127428  
 12 O -0.461056  
 13 H 0.313881  
 14 O -0.453391  
 15 H 0.315280  
 16 O -0.464524  
 17 H 0.310720  
 18 O -0.455800  
 19 H 0.319187  
 20 N -0.409436  
**21 C 0.471773**  
 22 C 0.019759  
 23 H 0.171271  
**24 C 0.022793**  
 25 H 0.187550  
 26 N -0.358208  
 27 H 0.341005

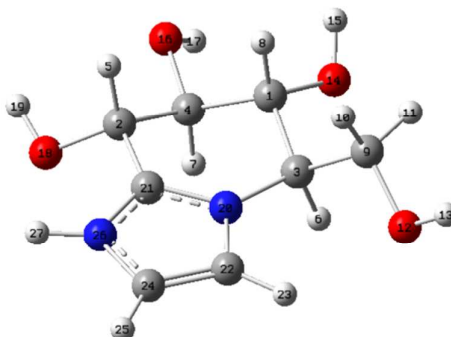

**Restricted conformational energy surface calculations**

The geometry with the lowest free Gibbs energy was selected as the starting point for the partial conformational energy surface calculation. A survey of the possible neighbouring conformational space was made by scanning two dihedral angles, including the C1-C2-C3-C4 (D1), C3-C4-C5-O (D3) ranging from  $-60^\circ$  to  $-20^\circ$ . The C5-O-C1-C2 (D5) was fixed at  $0^\circ$  since this is highly favoured. The resolution of this survey is determined by the step size which was set to  $5^\circ$  per puckering parameter. These structures were calculated with Gaussian 03 with a 6-311G(d,p) as basis set. Furthermore, solvation effects of H<sub>2</sub>O were taken into account with a polarizable continuum model function.

**Gluco-1H-imidazole (6) (both tautomers)**

| Name                                      | Q     | Theta | Phi   | $\Delta G_{aq}^T$ |
|-------------------------------------------|-------|-------|-------|-------------------|
| Glucose-1H-imidazole_D1_-40_D3_-45_D5_0   | 0.463 | 49.8  | 216.1 | 0.0               |
| Glucose-1H-imidazole_D1_-45_D3_-45_D5_0   | 0.492 | 49.7  | 210.0 | 0.0               |
| Glucose-1H-imidazole_D1_-45_D3_-40_D5_0   | 0.464 | 49.8  | 204.0 | 0.0               |
| Glucose-1H-imidazole_D1_-40_D3_-50_D5_0   | 0.497 | 50.1  | 221.2 | 0.2               |
| Glucose-1H-imidazole_D1_-40_D3_-40_D5_0   | 0.432 | 49.6  | 210.1 | 0.2               |
| Glucose-1H-imidazole-2_D1_-45_D3_-40_D5_0 | 0.461 | 49.7  | 204.9 | 0.2               |
| Glucose-1H-imidazole_D1_-35_D3_-45_D5_0   | 0.438 | 50.2  | 222.8 | 0.3               |
| Glucose-1H-imidazole_D1_-50_D3_-40_D5_0   | 0.498 | 50.2  | 198.9 | 0.3               |
| Glucose-1H-imidazole_D1_-45_D3_-50_D5_0   | 0.524 | 49.8  | 215.2 | 0.3               |
| Glucose-1H-imidazole-2_D1_-45_D3_-45_D5_0 | 0.491 | 49.7  | 211.0 | 0.4               |
| Glucose-1H-imidazole_D1_-45_D3_-35_D5_0   | 0.439 | 50.4  | 197.4 | 0.4               |
| Glucose-1H-imidazole-2_D1_-40_D3_-45_D5_0 | 0.463 | 49.9  | 217.0 | 0.4               |
| Glucose-1H-imidazole_D1_-35_D3_-50_D5_0   | 0.475 | 50.9  | 227.6 | 0.4               |
| Glucose-1H-imidazole-2_D1_-45_D3_-35_D5_0 | 0.435 | 50.1  | 198.1 | 0.4               |
| Glucose-1H-imidazole_D1_-50_D3_-45_D5_0   | 0.524 | 49.8  | 204.6 | 0.5               |
| Glucose-1H-imidazole_D1_-50_D3_-35_D5_0   | 0.476 | 51.0  | 192.5 | 0.5               |
| Glucose-1H-imidazole-2_D1_-40_D3_-40_D5_0 | 0.431 | 49.7  | 211.1 | 0.5               |
| Glucose-1H-imidazole-2_D1_-50_D3_-40_D5_0 | 0.495 | 50.1  | 199.4 | 0.5               |
| Glucose-1H-imidazole_D1_-35_D3_-40_D5_0   | 0.405 | 49.8  | 217.0 | 0.6               |
| Glucose-1H-imidazole-2_D1_-50_D3_-35_D5_0 | 0.471 | 50.8  | 193.1 | 0.6               |
| Glucose-1H-imidazole_D1_-40_D3_-35_D5_0   | 0.405 | 49.8  | 203.2 | 0.6               |
| Glucose-1H-imidazole-2_D1_-40_D3_-50_D5_0 | 0.499 | 50.4  | 222.1 | 0.6               |
| Glucose-1H-imidazole-2_D1_-35_D3_-45_D5_0 | 0.440 | 50.6  | 223.7 | 0.7               |
| Glucose-1H-imidazole-2_D1_-50_D3_-45_D5_0 | 0.523 | 49.8  | 205.4 | 0.7               |
| Glucose-1H-imidazole_D1_-30_D3_-50_D5_0   | 0.457 | 52.1  | 234.4 | 0.7               |
| Glucose-1H-imidazole-2_D1_-45_D3_-50_D5_0 | 0.524 | 49.9  | 216.2 | 0.7               |
| Glucose-1H-imidazole_D1_-30_D3_-45_D5_0   | 0.418 | 51.2  | 230.1 | 0.7               |
| Glucose-1H-imidazole-2_D1_-35_D3_-50_D5_0 | 0.477 | 51.3  | 228.4 | 0.8               |

|                                           |       |      |       |     |
|-------------------------------------------|-------|------|-------|-----|
| Glucose-1H-imidazole-2_D1_-40_D3_-35_D5_0 | 0.403 | 49.7 | 204.2 | 0.8 |
| Glucose-1H-imidazole_D1_-45_D3_-30_D5_0   | 0.419 | 51.4 | 190.2 | 0.8 |
| Glucose-1H-imidazole_D1_-40_D3_-55_D5_0   | 0.534 | 50.6 | 225.6 | 0.8 |
| Glucose-1H-imidazole-2_D1_-45_D3_-30_D5_0 | 0.414 | 51.1 | 190.8 | 0.8 |
| Glucose-1H-imidazole-2_D1_-35_D3_-40_D5_0 | 0.405 | 50.0 | 218.0 | 0.8 |
| Glucose-1H-imidazole_D1_-50_D3_-30_D5_0   | 0.457 | 52.3 | 185.9 | 0.9 |
| Glucose-1H-imidazole_D1_-35_D3_-55_D5_0   | 0.513 | 51.5 | 231.6 | 0.9 |
| Glucose-1H-imidazole_D1_-50_D3_-50_D5_0   | 0.555 | 49.7 | 209.9 | 0.9 |
| Glucose-1H-imidazole_D1_-35_D3_-35_D5_0   | 0.375 | 49.6 | 210.1 | 0.9 |
| Glucose-1H-imidazole_D1_-55_D3_-40_D5_0   | 0.535 | 50.8 | 194.5 | 1.0 |
| Glucose-1H-imidazole-2_D1_-50_D3_-30_D5_0 | 0.453 | 51.9 | 186.2 | 1.1 |
| Glucose-1H-imidazole_D1_-45_D3_-55_D5_0   | 0.559 | 50.1 | 219.8 | 1.1 |
| Glucose-1H-imidazole_D1_-30_D3_-40_D5_0   | 0.382 | 50.4 | 224.7 | 1.1 |
| Glucose-1H-imidazole_D1_-55_D3_-35_D5_0   | 0.514 | 51.7 | 188.5 | 1.1 |
| Glucose-1H-imidazole-2_D1_-55_D3_-40_D5_0 | 0.531 | 50.5 | 195.1 | 1.1 |
| Glucose-1H-imidazole-2_D1_-55_D3_-35_D5_0 | 0.509 | 51.4 | 189.0 | 1.1 |
| Glucose-1H-imidazole-2_D1_-30_D3_-45_D5_0 | 0.421 | 51.7 | 230.8 | 1.1 |
| Glucose-1H-imidazole_D1_-30_D3_-55_D5_0   | 0.497 | 52.9 | 238.0 | 1.1 |
| Glucose-1H-imidazole_D1_-40_D3_-30_D5_0   | 0.382 | 50.6 | 195.6 | 1.1 |
| Glucose-1H-imidazole-2_D1_-30_D3_-50_D5_0 | 0.460 | 52.5 | 235.0 | 1.1 |
| Glucose-1H-imidazole-2_D1_-35_D3_-35_D5_0 | 0.374 | 49.6 | 211.0 | 1.2 |
| Glucose-1H-imidazole-2_D1_-40_D3_-30_D5_0 | 0.379 | 50.3 | 196.3 | 1.2 |
| Glucose-1H-imidazole_D1_-25_D3_-50_D5_0   | 0.444 | 53.8 | 241.4 | 1.3 |
| Glucose-1H-imidazole-2_D1_-50_D3_-50_D5_0 | 0.553 | 49.7 | 210.8 | 1.3 |
| Glucose-1H-imidazole_D1_-25_D3_-45_D5_0   | 0.403 | 52.8 | 237.7 | 1.3 |
| Glucose-1H-imidazole-2_D1_-40_D3_-55_D5_0 | 0.536 | 51.0 | 226.3 | 1.3 |
| Glucose-1H-imidazole_D1_-55_D3_-45_D5_0   | 0.559 | 50.2 | 200.2 | 1.3 |
| Glucose-1H-imidazole-2_D1_-35_D3_-55_D5_0 | 0.516 | 52.0 | 232.2 | 1.3 |
| Glucose-1H-imidazole-2_D1_-30_D3_-40_D5_0 | 0.383 | 50.8 | 225.6 | 1.4 |
| Glucose-1H-imidazole-2_D1_-45_D3_-25_D5_0 | 0.398 | 52.6 | 183.1 | 1.4 |
| Glucose-1H-imidazole_D1_-45_D3_-25_D5_0   | 0.403 | 53.0 | 182.7 | 1.4 |
| Glucose-1H-imidazole_D1_-55_D3_-30_D5_0   | 0.498 | 53.1 | 182.3 | 1.4 |
| Glucose-1H-imidazole-2_D1_-55_D3_-45_D5_0 | 0.556 | 50.0 | 200.9 | 1.4 |
| Glucose-1H-imidazole_D1_-50_D3_-25_D5_0   | 0.444 | 54.0 | 179.0 | 1.5 |
| Glucose-1H-imidazole_D1_-30_D3_-35_D5_0   | 0.348 | 49.8 | 218.1 | 1.5 |
| Glucose-1H-imidazole-2_D1_-45_D3_-55_D5_0 | 0.560 | 50.3 | 220.6 | 1.5 |
| Glucose-1H-imidazole-2_D1_-55_D3_-30_D5_0 | 0.493 | 52.7 | 182.5 | 1.6 |
| Glucose-1H-imidazole_D1_-35_D3_-30_D5_0   | 0.349 | 49.9 | 202.2 | 1.6 |
| Glucose-1H-imidazole-2_D1_-30_D3_-55_D5_0 | 0.501 | 53.4 | 238.3 | 1.6 |
| Glucose-1H-imidazole-2_D1_-50_D3_-25_D5_0 | 0.439 | 53.6 | 179.2 | 1.6 |

|                                           |       |      |       |     |
|-------------------------------------------|-------|------|-------|-----|
| Glucose-1H-imidazole_D1_-25_D3_-40_D5_0   | 0.364 | 51.7 | 233.0 | 1.6 |
| Glucose-1H-imidazole_D1_-25_D3_-55_D5_0   | 0.486 | 54.6 | 244.4 | 1.6 |
| Glucose-1H-imidazole-2_D1_-25_D3_-45_D5_0 | 0.406 | 53.3 | 238.1 | 1.7 |
| Glucose-1H-imidazole-2_D1_-25_D3_-50_D5_0 | 0.448 | 54.3 | 241.7 | 1.7 |
| Glucose-1H-imidazole-2_D1_-35_D3_-30_D5_0 | 0.346 | 49.7 | 203.0 | 1.8 |
| Glucose-1H-imidazole-2_D1_-30_D3_-35_D5_0 | 0.348 | 50.0 | 219.0 | 1.8 |
| Glucose-1H-imidazole_D1_-55_D3_-50_D5_0   | 0.588 | 49.9 | 205.2 | 1.8 |
| Glucose-1H-imidazole_D1_-50_D3_-55_D5_0   | 0.588 | 49.8 | 214.5 | 1.8 |
| Glucose-1H-imidazole_D1_-55_D3_-25_D5_0   | 0.487 | 54.9 | 176.1 | 1.9 |
| Glucose-1H-imidazole_D1_-35_D3_-60_D5_0   | 0.553 | 52.2 | 234.9 | 1.9 |
| Glucose-1H-imidazole_D1_-40_D3_-25_D5_0   | 0.364 | 51.9 | 187.4 | 1.9 |
| Glucose-1H-imidazole_D1_-20_D3_-50_D5_0   | 0.436 | 55.9 | 248.3 | 1.9 |
| Glucose-1H-imidazole_D1_-20_D3_-45_D5_0   | 0.393 | 54.9 | 245.3 | 1.9 |
| Glucose-1H-imidazole-2_D1_-25_D3_-40_D5_0 | 0.366 | 52.2 | 233.6 | 2.0 |
| Glucose-1H-imidazole_D1_-40_D3_-60_D5_0   | 0.572 | 51.2 | 229.1 | 2.0 |
| Glucose-1H-imidazole-2_D1_-55_D3_-25_D5_0 | 0.481 | 54.4 | 176.1 | 2.0 |
| Glucose-1H-imidazole-2_D1_-60_D3_-35_D5_0 | 0.548 | 52.1 | 185.6 | 2.0 |
| Glucose-1H-imidazole_D1_-30_D3_-60_D5_0   | 0.539 | 53.6 | 240.8 | 2.0 |
| Glucose-1H-imidazole-2_D1_-40_D3_-25_D5_0 | 0.360 | 51.5 | 187.9 | 2.0 |
| Glucose-1H-imidazole-2_D1_-25_D3_-55_D5_0 | 0.491 | 55.2 | 244.5 | 2.1 |
| Glucose-1H-imidazole-2_D1_-60_D3_-40_D5_0 | 0.568 | 51.1 | 191.4 | 2.1 |
| Glucose-1H-imidazole-2_D1_-60_D3_-30_D5_0 | 0.533 | 53.5 | 179.6 | 2.1 |
| Glucose-1H-imidazole-2_D1_-50_D3_-20_D5_0 | 0.431 | 55.7 | 172.1 | 2.1 |
| Glucose-1H-imidazole_D1_-20_D3_-55_D5_0   | 0.480 | 56.8 | 250.6 | 2.1 |
| Glucose-1H-imidazole-2_D1_-45_D3_-20_D5_0 | 0.388 | 54.7 | 175.2 | 2.1 |
| Glucose-1H-imidazole_D1_-20_D3_-40_D5_0   | 0.351 | 53.8 | 241.6 | 2.2 |
| Glucose-1H-imidazole_D1_-25_D3_-35_D5_0   | 0.327 | 50.7 | 227.0 | 2.2 |
| Glucose-1H-imidazole_D1_-45_D3_-20_D5_0   | 0.393 | 55.2 | 175.2 | 2.2 |
| Glucose-1H-imidazole_D1_-50_D3_-20_D5_0   | 0.437 | 56.2 | 172.3 | 2.2 |
| Glucose-1H-imidazole_D1_-30_D3_-30_D5_0   | 0.319 | 49.5 | 210.1 | 2.2 |
| Glucose-1H-imidazole-2_D1_-20_D3_-45_D5_0 | 0.397 | 55.5 | 245.5 | 2.2 |
| Glucose-1H-imidazole-2_D1_-55_D3_-50_D5_0 | 0.586 | 49.8 | 206.1 | 2.2 |
| Glucose-1H-imidazole-2_D1_-50_D3_-55_D5_0 | 0.587 | 49.9 | 215.4 | 2.2 |
| Glucose-1H-imidazole_D1_-60_D3_-35_D5_0   | 0.554 | 52.4 | 185.3 | 2.2 |
| Glucose-1H-imidazole-2_D1_-20_D3_-50_D5_0 | 0.440 | 56.5 | 248.2 | 2.2 |
| Glucose-1H-imidazole-2_D1_-55_D3_-20_D5_0 | 0.474 | 56.6 | 169.7 | 2.3 |
| Glucose-1H-imidazole-2_D1_-60_D3_-25_D5_0 | 0.523 | 55.2 | 173.6 | 2.3 |
| Glucose-1H-imidazole_D1_-25_D3_-60_D5_0   | 0.529 | 55.4 | 246.7 | 2.4 |
| Glucose-1H-imidazole_D1_-60_D3_-40_D5_0   | 0.573 | 51.4 | 190.9 | 2.4 |
| Glucose-1H-imidazole_D1_-35_D3_-25_D5_0   | 0.328 | 50.9 | 193.2 | 2.4 |

|                                           |       |      |       |     |
|-------------------------------------------|-------|------|-------|-----|
| Glucose-1H-imidazole-2_D1_-30_D3_-30_D5_0 | 0.318 | 49.6 | 211.0 | 2.4 |
| Glucose-1H-imidazole_D1_-45_D3_-60_D5_0   | 0.596 | 50.5 | 223.6 | 2.4 |
| Glucose-1H-imidazole-2_D1_-25_D3_-35_D5_0 | 0.328 | 51.1 | 227.8 | 2.4 |
| Glucose-1H-imidazole_D1_-60_D3_-30_D5_0   | 0.539 | 53.8 | 179.6 | 2.4 |
| Glucose-1H-imidazole-2_D1_-35_D3_-60_D5_0 | 0.557 | 52.7 | 235.4 | 2.4 |
| Glucose-1H-imidazole-2_D1_-35_D3_-25_D5_0 | 0.324 | 50.6 | 193.9 | 2.4 |
| Glucose-1H-imidazole-2_D1_-20_D3_-40_D5_0 | 0.355 | 54.4 | 241.9 | 2.5 |
| Glucose-1H-imidazole_D1_-40_D3_-20_D5_0   | 0.352 | 54.0 | 178.9 | 2.5 |
| Glucose-1H-imidazole-2_D1_-20_D3_-55_D5_0 | 0.486 | 57.3 | 250.5 | 2.5 |
| Glucose-1H-imidazole_D1_-55_D3_-20_D5_0   | 0.481 | 57.1 | 169.9 | 2.5 |
| Glucose-1H-imidazole-2_D1_-30_D3_-60_D5_0 | 0.544 | 54.1 | 241.1 | 2.5 |
| Glucose-1H-imidazole-2_D1_-40_D3_-60_D5_0 | 0.575 | 51.5 | 229.8 | 2.5 |
| Glucose-1H-imidazole-2_D1_-40_D3_-20_D5_0 | 0.347 | 53.6 | 179.1 | 2.6 |
| Glucose-1H-imidazole_D1_-20_D3_-35_D5_0   | 0.311 | 52.5 | 236.7 | 2.6 |
| Glucose-1H-imidazole-2_D1_-60_D3_-20_D5_0 | 0.518 | 57.3 | 167.8 | 2.7 |
| Glucose-1H-imidazole-2_D1_-60_D3_-45_D5_0 | 0.592 | 50.4 | 196.9 | 2.7 |
| Glucose-1H-imidazole_D1_-20_D3_-60_D5_0   | 0.524 | 57.5 | 252.5 | 2.8 |
| Glucose-1H-imidazole_D1_-60_D3_-45_D5_0   | 0.597 | 50.6 | 196.2 | 2.8 |
| Glucose-1H-imidazole_D1_-25_D3_-30_D5_0   | 0.294 | 49.9 | 219.6 | 2.9 |
| Glucose-1H-imidazole-2_D1_-25_D3_-60_D5_0 | 0.535 | 55.9 | 246.8 | 2.9 |
| Glucose-1H-imidazole_D1_-60_D3_-25_D5_0   | 0.529 | 55.6 | 173.7 | 2.9 |
| Glucose-1H-imidazole_D1_-30_D3_-25_D5_0   | 0.294 | 50.0 | 200.7 | 2.9 |
| Glucose-1H-imidazole-2_D1_-20_D3_-35_D5_0 | 0.314 | 53.0 | 237.1 | 2.9 |
| Glucose-1H-imidazole-2_D1_-45_D3_-60_D5_0 | 0.597 | 50.7 | 224.4 | 2.9 |
| Glucose-1H-imidazole-2_D1_-25_D3_-30_D5_0 | 0.294 | 50.1 | 220.5 | 3.0 |
| Glucose-1H-imidazole_D1_-35_D3_-20_D5_0   | 0.312 | 52.7 | 183.7 | 3.0 |
| Glucose-1H-imidazole-2_D1_-35_D3_-20_D5_0 | 0.308 | 52.3 | 184.1 | 3.1 |
| Glucose-1H-imidazole-2_D1_-30_D3_-25_D5_0 | 0.292 | 49.8 | 201.6 | 3.1 |
| Glucose-1H-imidazole_D1_-55_D3_-55_D5_0   | 0.620 | 49.8 | 209.8 | 3.1 |
| Glucose-1H-imidazole_D1_-20_D3_-30_D5_0   | 0.274 | 51.2 | 230.3 | 3.2 |
| Glucose-1H-imidazole-2_D1_-20_D3_-60_D5_0 | 0.530 | 58.0 | 252.3 | 3.2 |
| Glucose-1H-imidazole-2_D1_-20_D3_-30_D5_0 | 0.275 | 51.6 | 230.9 | 3.4 |
| Glucose-1H-imidazole_D1_-50_D3_-60_D5_0   | 0.623 | 50.0 | 218.4 | 3.4 |
| Glucose-1H-imidazole_D1_-60_D3_-20_D5_0   | 0.525 | 57.8 | 168.1 | 3.5 |
| Glucose-1H-imidazole_D1_-25_D3_-25_D5_0   | 0.264 | 49.5 | 210.1 | 3.5 |
| Glucose-1H-imidazole-2_D1_-55_D3_-55_D5_0 | 0.619 | 49.8 | 210.6 | 3.6 |
| Glucose-1H-imidazole_D1_-30_D3_-20_D5_0   | 0.275 | 51.4 | 190.0 | 3.6 |
| Glucose-1H-imidazole-2_D1_-25_D3_-25_D5_0 | 0.263 | 49.6 | 210.9 | 3.6 |
| Glucose-1H-imidazole_D1_-60_D3_-50_D5_0   | 0.624 | 50.2 | 201.3 | 3.7 |
| Glucose-1H-imidazole-2_D1_-30_D3_-20_D5_0 | 0.272 | 51.0 | 190.6 | 3.7 |

|                                           |       |      |       |     |
|-------------------------------------------|-------|------|-------|-----|
| Glucose-1H-imidazole-2_D1_-60_D3_-50_D5_0 | 0.621 | 50.0 | 202.0 | 4.3 |
| Glucose-1H-imidazole-2_D1_-50_D3_-60_D5_0 | 0.624 | 50.2 | 219.3 | 4.4 |
| Glucose-1H-imidazole_D1_-20_D3_-25_D5_0   | 0.240 | 50.0 | 221.6 | 4.8 |
| Glucose-1H-imidazole-2_D1_-20_D3_-25_D5_0 | 0.240 | 50.3 | 222.3 | 4.9 |
| Glucose-1H-imidazole_D1_-25_D3_-20_D5_0   | 0.240 | 50.1 | 198.6 | 4.9 |
| Glucose-1H-imidazole-2_D1_-25_D3_-20_D5_0 | 0.238 | 49.9 | 199.4 | 4.9 |
| Glucose-1H-imidazole-2_D1_-20_D3_-20_D5_0 | 0.210 | 49.5 | 210.8 | 5.2 |
| Glucose-1H-imidazole_D1_-20_D3_-20_D5_0   | 0.211 | 49.5 | 210.0 | 5.2 |
| Glucose-1H-imidazole_D1_-55_D3_-60_D5_0   | 0.654 | 49.9 | 213.8 | 5.4 |
| Glucose-1H-imidazole_D1_-60_D3_-55_D5_0   | 0.654 | 49.9 | 206.0 | 5.5 |
| Glucose-1H-imidazole-2_D1_-60_D3_-55_D5_0 | 0.653 | 49.9 | 206.6 | 5.8 |
| Glucose-1H-imidazole-2_D1_-55_D3_-60_D5_0 | 0.654 | 50.0 | 214.5 | 6.0 |
| Glucose-1H-imidazole_D1_-60_D3_-60_D5_0   | 0.688 | 49.9 | 209.9 | 7.3 |
| Glucose-1H-imidazole-2_D1_-60_D3_-60_D5_0 | 0.687 | 49.9 | 210.5 | 7.8 |

**Glucose-1H-imidazole-protonated (6)**

| Name                                               | Q     | Theta | Phi   | $\Delta G_{aq}^T$ |
|----------------------------------------------------|-------|-------|-------|-------------------|
| Glucose-1H-imidazole-protonated_D1_-45_D3_-40_D5_0 | 0.465 | 49.7  | 204.3 | 0.0               |
| Glucose-1H-imidazole-protonated_D1_-45_D3_-45_D5_0 | 0.495 | 49.6  | 210.3 | 0.0               |
| Glucose-1H-imidazole-protonated_D1_-40_D3_-45_D5_0 | 0.466 | 49.7  | 216.4 | 0.1               |
| Glucose-1H-imidazole-protonated_D1_-40_D3_-40_D5_0 | 0.434 | 49.6  | 210.4 | 0.1               |
| Glucose-1H-imidazole-protonated_D1_-50_D3_-40_D5_0 | 0.500 | 50.1  | 199.0 | 0.2               |
| Glucose-1H-imidazole-protonated_D1_-30_D3_-45_D5_0 | 0.422 | 51.3  | 230.4 | 0.3               |
| Glucose-1H-imidazole-protonated_D1_-50_D3_-45_D5_0 | 0.527 | 49.7  | 205.0 | 0.3               |
| Glucose-1H-imidazole-protonated_D1_-35_D3_-45_D5_0 | 0.442 | 50.3  | 223.1 | 0.4               |
| Glucose-1H-imidazole-protonated_D1_-40_D3_-35_D5_0 | 0.407 | 49.7  | 203.6 | 0.4               |
| Glucose-1H-imidazole-protonated_D1_-40_D3_-50_D5_0 | 0.501 | 50.1  | 221.6 | 0.4               |
| Glucose-1H-imidazole-protonated_D1_-45_D3_-35_D5_0 | 0.440 | 50.2  | 197.5 | 0.4               |
| Glucose-1H-imidazole-protonated_D1_-35_D3_-40_D5_0 | 0.407 | 49.8  | 217.3 | 0.4               |
| Glucose-1H-imidazole-protonated_D1_-35_D3_-35_D5_0 | 0.377 | 49.5  | 210.5 | 0.5               |
| Glucose-1H-imidazole-protonated_D1_-45_D3_-50_D5_0 | 0.527 | 49.7  | 215.6 | 0.5               |
| Glucose-1H-imidazole-protonated_D1_-45_D3_-30_D5_0 | 0.420 | 51.3  | 190.2 | 0.5               |
| Glucose-1H-imidazole-protonated_D1_-35_D3_-50_D5_0 | 0.479 | 50.9  | 228.0 | 0.5               |
| Glucose-1H-imidazole-protonated_D1_-50_D3_-35_D5_0 | 0.476 | 50.9  | 192.6 | 0.6               |
| Glucose-1H-imidazole-protonated_D1_-30_D3_-40_D5_0 | 0.385 | 50.5  | 225.0 | 0.6               |
| Glucose-1H-imidazole-protonated_D1_-50_D3_-30_D5_0 | 0.459 | 52.1  | 185.8 | 0.7               |
| Glucose-1H-imidazole-protonated_D1_-55_D3_-40_D5_0 | 0.537 | 50.6  | 194.6 | 0.8               |
| Glucose-1H-imidazole-protonated_D1_-45_D3_-25_D5_0 | 0.404 | 52.8  | 182.6 | 0.8               |
| Glucose-1H-imidazole-protonated_D1_-55_D3_-30_D5_0 | 0.499 | 53.0  | 182.2 | 0.8               |



|                                                    |       |      |       |     |
|----------------------------------------------------|-------|------|-------|-----|
| Glucose-1H-imidazole-protonated_D1_-30_D3_-35_D5_0 | 0.351 | 49.8 | 218.5 | 0.9 |
| Glucose-1H-imidazole-protonated_D1_-50_D3_-50_D5_0 | 0.558 | 49.6 | 210.3 | 1.0 |
| Glucose-1H-imidazole-protonated_D1_-40_D3_-30_D5_0 | 0.383 | 50.4 | 195.6 | 1.0 |
| Glucose-1H-imidazole-protonated_D1_-50_D3_-25_D5_0 | 0.445 | 53.9 | 178.8 | 1.0 |
| Glucose-1H-imidazole-protonated_D1_-55_D3_-35_D5_0 | 0.516 | 51.6 | 188.6 | 1.0 |
| Glucose-1H-imidazole-protonated_D1_-50_D3_-20_D5_0 | 0.437 | 56.1 | 172.0 | 1.1 |
| Glucose-1H-imidazole-protonated_D1_-40_D3_-55_D5_0 | 0.538 | 50.7 | 225.9 | 1.2 |
| Glucose-1H-imidazole-protonated_D1_-35_D3_-30_D5_0 | 0.350 | 49.8 | 202.4 | 1.2 |
| Glucose-1H-imidazole-protonated_D1_-35_D3_-55_D5_0 | 0.518 | 51.6 | 232.0 | 1.2 |
| Glucose-1H-imidazole-protonated_D1_-55_D3_-25_D5_0 | 0.488 | 54.7 | 175.9 | 1.3 |
| Glucose-1H-imidazole-protonated_D1_-45_D3_-55_D5_0 | 0.563 | 50.1 | 220.2 | 1.3 |
| Glucose-1H-imidazole-protonated_D1_-55_D3_-45_D5_0 | 0.562 | 50.0 | 200.3 | 1.4 |
| Glucose-1H-imidazole-protonated_D1_-30_D3_-50_D5_0 | 0.460 | 52.1 | 234.5 | 1.4 |
| Glucose-1H-imidazole-protonated_D1_-30_D3_-30_D5_0 | 0.320 | 49.5 | 210.5 | 1.6 |
| Glucose-1H-imidazole-protonated_D1_-55_D3_-20_D5_0 | 0.481 | 56.9 | 169.7 | 1.7 |
| Glucose-1H-imidazole-protonated_D1_-40_D3_-25_D5_0 | 0.365 | 51.8 | 187.3 | 1.8 |
| Glucose-1H-imidazole-protonated_D1_-30_D3_-55_D5_0 | 0.501 | 53.0 | 238.0 | 1.8 |
| Glucose-1H-imidazole-protonated_D1_-25_D3_-35_D5_0 | 0.330 | 50.8 | 227.4 | 1.8 |
| Glucose-1H-imidazole-protonated_D1_-35_D3_-25_D5_0 | 0.328 | 50.7 | 193.4 | 1.9 |
| Glucose-1H-imidazole-protonated_D1_-50_D3_-55_D5_0 | 0.592 | 49.8 | 214.9 | 2.0 |
| Glucose-1H-imidazole-protonated_D1_-60_D3_-40_D5_0 | 0.575 | 51.2 | 190.9 | 2.0 |
| Glucose-1H-imidazole-protonated_D1_-60_D3_-35_D5_0 | 0.556 | 52.3 | 185.2 | 2.0 |
| Glucose-1H-imidazole-protonated_D1_-55_D3_-50_D5_0 | 0.591 | 49.8 | 205.6 | 2.0 |
| Glucose-1H-imidazole-protonated_D1_-45_D3_-20_D5_0 | 0.394 | 55.0 | 175.1 | 2.0 |
| Glucose-1H-imidazole-protonated_D1_-60_D3_-25_D5_0 | 0.531 | 55.5 | 173.5 | 2.0 |
| Glucose-1H-imidazole-protonated_D1_-60_D3_-20_D5_0 | 0.525 | 57.6 | 167.9 | 2.1 |
| Glucose-1H-imidazole-protonated_D1_-25_D3_-50_D5_0 | 0.447 | 53.9 | 241.4 | 2.1 |
| Glucose-1H-imidazole-protonated_D1_-60_D3_-30_D5_0 | 0.541 | 53.7 | 179.3 | 2.1 |
| Glucose-1H-imidazole-protonated_D1_-20_D3_-35_D5_0 | 0.314 | 52.6 | 236.9 | 2.2 |
| Glucose-1H-imidazole-protonated_D1_-20_D3_-50_D5_0 | 0.439 | 56.1 | 248.2 | 2.2 |
| Glucose-1H-imidazole-protonated_D1_-40_D3_-20_D5_0 | 0.352 | 53.8 | 179.0 | 2.2 |
| Glucose-1H-imidazole-protonated_D1_-30_D3_-60_D5_0 | 0.545 | 53.8 | 241.1 | 2.2 |
| Glucose-1H-imidazole-protonated_D1_-35_D3_-60_D5_0 | 0.559 | 52.3 | 235.3 | 2.3 |
| Glucose-1H-imidazole-protonated_D1_-25_D3_-45_D5_0 | 0.407 | 52.9 | 238.0 | 2.3 |
| Glucose-1H-imidazole-protonated_D1_-40_D3_-60_D5_0 | 0.577 | 51.2 | 229.5 | 2.4 |
| Glucose-1H-imidazole-protonated_D1_-25_D3_-30_D5_0 | 0.296 | 49.9 | 220.0 | 2.4 |
| Glucose-1H-imidazole-protonated_D1_-25_D3_-55_D5_0 | 0.489 | 54.7 | 244.3 | 2.5 |
| Glucose-1H-imidazole-protonated_D1_-30_D3_-25_D5_0 | 0.295 | 49.8 | 201.0 | 2.5 |
| Glucose-1H-imidazole-protonated_D1_-20_D3_-55_D5_0 | 0.484 | 56.9 | 250.6 | 2.5 |
| Glucose-1H-imidazole-protonated_D1_-60_D3_-45_D5_0 | 0.599 | 50.5 | 196.4 | 2.6 |

|                                                    |       |      |       |     |
|----------------------------------------------------|-------|------|-------|-----|
| Glucose-1H-imidazole-protonated_D1_-20_D3_-40_D5_0 | 0.355 | 53.9 | 241.8 | 2.7 |
| Glucose-1H-imidazole-protonated_D1_-45_D3_-60_D5_0 | 0.601 | 50.5 | 223.9 | 2.8 |
| Glucose-1H-imidazole-protonated_D1_-35_D3_-20_D5_0 | 0.313 | 52.6 | 183.8 | 2.8 |
| Glucose-1H-imidazole-protonated_D1_-20_D3_-45_D5_0 | 0.397 | 55.1 | 245.5 | 2.9 |
| Glucose-1H-imidazole-protonated_D1_-20_D3_-30_D5_0 | 0.276 | 51.3 | 230.5 | 3.1 |
| Glucose-1H-imidazole-protonated_D1_-25_D3_-60_D5_0 | 0.533 | 55.5 | 246.7 | 3.2 |
| Glucose-1H-imidazole-protonated_D1_-55_D3_-55_D5_0 | 0.624 | 49.7 | 210.2 | 3.2 |
| Glucose-1H-imidazole-protonated_D1_-30_D3_-20_D5_0 | 0.275 | 51.2 | 190.3 | 3.3 |
| Glucose-1H-imidazole-protonated_D1_-25_D3_-25_D5_0 | 0.266 | 49.5 | 210.4 | 3.3 |
| Glucose-1H-imidazole-protonated_D1_-20_D3_-60_D5_0 | 0.528 | 57.6 | 252.4 | 3.3 |
| Glucose-1H-imidazole-protonated_D1_-20_D3_-25_D5_0 | 0.242 | 50.1 | 221.9 | 3.4 |
| Glucose-1H-imidazole-protonated_D1_-60_D3_-50_D5_0 | 0.627 | 50.0 | 201.5 | 3.6 |
| Glucose-1H-imidazole-protonated_D1_-50_D3_-60_D5_0 | 0.628 | 50.0 | 218.8 | 3.6 |
| Glucose-1H-imidazole-protonated_D1_-25_D3_-20_D5_0 | 0.241 | 50.0 | 198.9 | 3.9 |
| Glucose-1H-imidazole-protonated_D1_-55_D3_-60_D5_0 | 0.659 | 49.8 | 214.1 | 5.2 |
| Glucose-1H-imidazole-protonated_D1_-60_D3_-55_D5_0 | 0.658 | 49.8 | 206.1 | 5.2 |
| Glucose-1H-imidazole-protonated_D1_-20_D3_-20_D5_0 | 0.212 | 49.5 | 210.4 | 6.1 |
| Glucose-1H-imidazole-protonated_D1_-60_D3_-60_D5_0 | 0.692 | 49.8 | 209.9 | 7.7 |

**Glucoimidazole (5)**

| Name                                 | Q     | Theta | Phi   | $\Delta G_{aq}^T$ |
|--------------------------------------|-------|-------|-------|-------------------|
| Glucose-imidazole_D1_-50_D3_-40_D5_0 | 0.493 | 50.2  | 198.6 | 0.0               |
| Glucose-imidazole_D1_-45_D3_-40_D5_0 | 0.459 | 49.9  | 203.8 | 0.0               |
| Glucose-imidazole_D1_-45_D3_-45_D5_0 | 0.488 | 49.8  | 209.9 | 0.1               |
| Glucose-imidazole_D1_-50_D3_-35_D5_0 | 0.471 | 50.9  | 192.1 | 0.1               |
| Glucose-imidazole_D1_-50_D3_-45_D5_0 | 0.519 | 49.9  | 204.5 | 0.1               |
| Glucose-imidazole_D1_-45_D3_-35_D5_0 | 0.434 | 50.3  | 197.1 | 0.2               |
| Glucose-imidazole_D1_-50_D3_-30_D5_0 | 0.453 | 52.1  | 185.4 | 0.3               |
| Glucose-imidazole_D1_-40_D3_-40_D5_0 | 0.428 | 49.8  | 209.9 | 0.4               |
| Glucose-imidazole_D1_-40_D3_-45_D5_0 | 0.459 | 50.0  | 216.0 | 0.4               |
| Glucose-imidazole_D1_-55_D3_-30_D5_0 | 0.493 | 52.9  | 181.8 | 0.4               |
| Glucose-imidazole_D1_-55_D3_-35_D5_0 | 0.509 | 51.6  | 188.1 | 0.4               |
| Glucose-imidazole_D1_-45_D3_-50_D5_0 | 0.520 | 50.0  | 215.3 | 0.5               |
| Glucose-imidazole_D1_-40_D3_-50_D5_0 | 0.494 | 50.5  | 221.2 | 0.5               |
| Glucose-imidazole_D1_-55_D3_-40_D5_0 | 0.529 | 50.7  | 194.1 | 0.5               |
| Glucose-imidazole_D1_-40_D3_-35_D5_0 | 0.401 | 49.9  | 203.0 | 0.6               |
| Glucose-imidazole_D1_-45_D3_-30_D5_0 | 0.415 | 51.3  | 189.8 | 0.7               |
| Glucose-imidazole_D1_-50_D3_-25_D5_0 | 0.440 | 53.7  | 178.5 | 0.7               |
| Glucose-imidazole_D1_-35_D3_-45_D5_0 | 0.435 | 50.6  | 222.6 | 0.7               |

|                                      |       |      |       |     |
|--------------------------------------|-------|------|-------|-----|
| Glucose-imidazole_D1_-35_D3_-50_D5_0 | 0.472 | 51.3 | 227.5 | 0.8 |
| Glucose-imidazole_D1_-35_D3_-40_D5_0 | 0.402 | 50.0 | 216.8 | 0.8 |
| Glucose-imidazole_D1_-55_D3_-25_D5_0 | 0.483 | 54.6 | 175.5 | 0.8 |
| Glucose-imidazole_D1_-25_D3_-50_D5_0 | 0.442 | 54.3 | 240.9 | 0.8 |
| Glucose-imidazole_D1_-50_D3_-50_D5_0 | 0.549 | 49.9 | 209.9 | 0.8 |
| Glucose-imidazole_D1_-55_D3_-45_D5_0 | 0.554 | 50.2 | 199.9 | 0.9 |
| Glucose-imidazole_D1_-55_D3_-20_D5_0 | 0.477 | 56.7 | 169.3 | 0.9 |
| Glucose-imidazole_D1_-40_D3_-55_D5_0 | 0.530 | 51.0 | 225.5 | 1.0 |
| Glucose-imidazole_D1_-60_D3_-30_D5_0 | 0.535 | 53.6 | 178.9 | 1.0 |
| Glucose-imidazole_D1_-35_D3_-55_D5_0 | 0.511 | 52.0 | 231.5 | 1.0 |
| Glucose-imidazole_D1_-60_D3_-25_D5_0 | 0.526 | 55.4 | 173.1 | 1.0 |
| Glucose-imidazole_D1_-50_D3_-20_D5_0 | 0.432 | 55.8 | 171.7 | 1.0 |
| Glucose-imidazole_D1_-30_D3_-50_D5_0 | 0.455 | 52.6 | 234.2 | 1.1 |
| Glucose-imidazole_D1_-35_D3_-35_D5_0 | 0.371 | 49.7 | 209.9 | 1.1 |
| Glucose-imidazole_D1_-60_D3_-35_D5_0 | 0.549 | 52.3 | 184.8 | 1.1 |
| Glucose-imidazole_D1_-25_D3_-55_D5_0 | 0.485 | 55.3 | 243.9 | 1.1 |
| Glucose-imidazole_D1_-30_D3_-45_D5_0 | 0.416 | 51.7 | 229.8 | 1.1 |
| Glucose-imidazole_D1_-30_D3_-55_D5_0 | 0.496 | 53.5 | 237.7 | 1.1 |
| Glucose-imidazole_D1_-45_D3_-25_D5_0 | 0.399 | 52.8 | 182.3 | 1.1 |
| Glucose-imidazole_D1_-25_D3_-45_D5_0 | 0.401 | 53.3 | 237.2 | 1.2 |
| Glucose-imidazole_D1_-60_D3_-20_D5_0 | 0.521 | 57.4 | 167.5 | 1.2 |
| Glucose-imidazole_D1_-40_D3_-30_D5_0 | 0.378 | 50.5 | 195.3 | 1.2 |
| Glucose-imidazole_D1_-45_D3_-55_D5_0 | 0.554 | 50.4 | 219.8 | 1.2 |
| Glucose-imidazole_D1_-30_D3_-40_D5_0 | 0.379 | 50.8 | 224.5 | 1.3 |
| Glucose-imidazole_D1_-60_D3_-40_D5_0 | 0.568 | 51.2 | 190.5 | 1.3 |
| Glucose-imidazole_D1_-45_D3_-20_D5_0 | 0.389 | 54.8 | 174.7 | 1.4 |
| Glucose-imidazole_D1_-25_D3_-35_D5_0 | 0.325 | 51.1 | 226.7 | 1.5 |
| Glucose-imidazole_D1_-25_D3_-60_D5_0 | 0.529 | 56.0 | 246.2 | 1.5 |
| Glucose-imidazole_D1_-30_D3_-60_D5_0 | 0.537 | 54.2 | 240.5 | 1.5 |
| Glucose-imidazole_D1_-30_D3_-35_D5_0 | 0.345 | 50.1 | 217.8 | 1.5 |
| Glucose-imidazole_D1_-25_D3_-40_D5_0 | 0.362 | 52.2 | 232.6 | 1.5 |
| Glucose-imidazole_D1_-55_D3_-50_D5_0 | 0.582 | 49.9 | 205.1 | 1.6 |
| Glucose-imidazole_D1_-35_D3_-60_D5_0 | 0.551 | 52.8 | 234.8 | 1.6 |
| Glucose-imidazole_D1_-40_D3_-25_D5_0 | 0.360 | 51.8 | 187.0 | 1.7 |
| Glucose-imidazole_D1_-50_D3_-55_D5_0 | 0.582 | 50.0 | 214.5 | 1.7 |
| Glucose-imidazole_D1_-35_D3_-30_D5_0 | 0.345 | 49.9 | 201.9 | 1.8 |
| Glucose-imidazole_D1_-40_D3_-60_D5_0 | 0.569 | 51.6 | 229.1 | 1.8 |
| Glucose-imidazole_D1_-60_D3_-45_D5_0 | 0.591 | 50.6 | 196.0 | 1.9 |
| Glucose-imidazole_D1_-40_D3_-20_D5_0 | 0.348 | 53.7 | 178.4 | 1.9 |
| Glucose-imidazole_D1_-30_D3_-30_D5_0 | 0.316 | 49.7 | 209.8 | 2.0 |

|                                      |       |      |       |     |
|--------------------------------------|-------|------|-------|-----|
| Glucose-imidazole_D1_-35_D3_-25_D5_0 | 0.324 | 50.8 | 192.9 | 2.2 |
| Glucose-imidazole_D1_-45_D3_-60_D5_0 | 0.591 | 50.8 | 223.6 | 2.2 |
| Glucose-imidazole_D1_-30_D3_-25_D5_0 | 0.291 | 50.0 | 200.3 | 2.4 |
| Glucose-imidazole_D1_-35_D3_-20_D5_0 | 0.308 | 52.5 | 183.3 | 2.5 |
| Glucose-imidazole_D1_-55_D3_-55_D5_0 | 0.614 | 49.9 | 209.7 | 2.8 |
| Glucose-imidazole_D1_-60_D3_-50_D5_0 | 0.618 | 50.2 | 201.1 | 2.9 |
| Glucose-imidazole_D1_-20_D3_-55_D5_0 | 0.479 | 57.4 | 249.9 | 3.1 |
| Glucose-imidazole_D1_-50_D3_-60_D5_0 | 0.618 | 50.3 | 218.5 | 3.1 |
| Glucose-imidazole_D1_-20_D3_-60_D5_0 | 0.524 | 58.1 | 251.7 | 3.2 |
| Glucose-imidazole_D1_-20_D3_-50_D5_0 | 0.435 | 56.6 | 247.6 | 3.3 |
| Glucose-imidazole_D1_-20_D3_-45_D5_0 | 0.392 | 55.5 | 244.7 | 3.6 |
| Glucose-imidazole_D1_-20_D3_-40_D5_0 | 0.349 | 54.3 | 241.0 | 3.9 |
| Glucose-imidazole_D1_-60_D3_-55_D5_0 | 0.648 | 50.0 | 205.7 | 4.4 |
| Glucose-imidazole_D1_-25_D3_-30_D5_0 | 0.291 | 50.2 | 219.2 | 4.4 |
| Glucose-imidazole_D1_-55_D3_-60_D5_0 | 0.648 | 50.1 | 213.9 | 4.5 |
| Glucose-imidazole_D1_-20_D3_-35_D5_0 | 0.309 | 53.0 | 236.1 | 4.6 |
| Glucose-imidazole_D1_-25_D3_-25_D5_0 | 0.262 | 49.7 | 209.8 | 5.1 |
| Glucose-imidazole_D1_-30_D3_-20_D5_0 | 0.271 | 51.2 | 189.7 | 5.1 |
| Glucose-imidazole_D1_-20_D3_-30_D5_0 | 0.272 | 51.6 | 229.6 | 5.3 |
| Glucose-imidazole_D1_-25_D3_-20_D5_0 | 0.238 | 50.1 | 198.3 | 5.9 |
| Glucose-imidazole_D1_-20_D3_-25_D5_0 | 0.238 | 50.3 | 221.1 | 5.9 |
| Glucose-imidazole_D1_-20_D3_-20_D5_0 | 0.208 | 49.7 | 209.7 | 6.5 |
| Glucose-imidazole_D1_-60_D3_-60_D5_0 | 0.682 | 50.0 | 209.8 | 6.6 |

**Glucoimidazole-protonated (5)**

| Name                                            | Q     | Theta | Phi   | $\Delta G_{aq}^T$ |
|-------------------------------------------------|-------|-------|-------|-------------------|
| Glucose-imidazole-protonated_D1_-40_D3_-45_D5_0 | 0.463 | 49.7  | 215.3 | 0.0               |
| Glucose-imidazole-protonated_D1_-45_D3_-40_D5_0 | 0.464 | 49.8  | 203.1 | 0.6               |
| Glucose-imidazole-protonated_D1_-40_D3_-40_D5_0 | 0.432 | 49.6  | 209.2 | 0.7               |
| Glucose-imidazole-protonated_D1_-50_D3_-35_D5_0 | 0.478 | 51.1  | 191.4 | 0.8               |
| Glucose-imidazole-protonated_D1_-50_D3_-40_D5_0 | 0.500 | 50.3  | 197.8 | 0.8               |
| Glucose-imidazole-protonated_D1_-50_D3_-30_D5_0 | 0.461 | 52.4  | 184.9 | 0.8               |
| Glucose-imidazole-protonated_D1_-55_D3_-35_D5_0 | 0.518 | 51.9  | 187.4 | 1.0               |
| Glucose-imidazole-protonated_D1_-55_D3_-30_D5_0 | 0.503 | 53.2  | 181.4 | 1.0               |
| Glucose-imidazole-protonated_D1_-45_D3_-45_D5_0 | 0.492 | 49.6  | 209.1 | 1.0               |
| Glucose-imidazole-protonated_D1_-50_D3_-45_D5_0 | 0.525 | 49.8  | 203.7 | 1.1               |
| Glucose-imidazole-protonated_D1_-45_D3_-35_D5_0 | 0.440 | 50.4  | 196.4 | 1.1               |
| Glucose-imidazole-protonated_D1_-55_D3_-40_D5_0 | 0.538 | 50.8  | 193.4 | 1.1               |
| Glucose-imidazole-protonated_D1_-40_D3_-35_D5_0 | 0.406 | 49.8  | 202.2 | 1.2               |

|                                                 |       |      |       |     |
|-------------------------------------------------|-------|------|-------|-----|
| Glucose-imidazole-protonated_D1_-45_D3_-50_D5_0 | 0.524 | 49.7 | 214.6 | 1.2 |
| Glucose-imidazole-protonated_D1_-40_D3_-50_D5_0 | 0.497 | 50.1 | 220.6 | 1.2 |
| Glucose-imidazole-protonated_D1_-50_D3_-20_D5_0 | 0.441 | 56.3 | 171.5 | 1.3 |
| Glucose-imidazole-protonated_D1_-45_D3_-30_D5_0 | 0.421 | 51.5 | 189.1 | 1.3 |
| Glucose-imidazole-protonated_D1_-55_D3_-20_D5_0 | 0.486 | 57.1 | 169.3 | 1.3 |
| Glucose-imidazole-protonated_D1_-50_D3_-25_D5_0 | 0.449 | 54.1 | 178.2 | 1.4 |
| Glucose-imidazole-protonated_D1_-55_D3_-45_D5_0 | 0.561 | 50.2 | 199.1 | 1.5 |
| Glucose-imidazole-protonated_D1_-60_D3_-25_D5_0 | 0.536 | 55.8 | 172.9 | 1.6 |
| Glucose-imidazole-protonated_D1_-60_D3_-35_D5_0 | 0.559 | 52.6 | 184.2 | 1.6 |
| Glucose-imidazole-protonated_D1_-40_D3_-55_D5_0 | 0.533 | 50.6 | 225.1 | 1.7 |
| Glucose-imidazole-protonated_D1_-50_D3_-50_D5_0 | 0.554 | 49.7 | 209.3 | 1.7 |
| Glucose-imidazole-protonated_D1_-60_D3_-30_D5_0 | 0.546 | 54.0 | 178.5 | 1.7 |
| Glucose-imidazole-protonated_D1_-45_D3_-25_D5_0 | 0.406 | 53.1 | 181.8 | 1.7 |
| Glucose-imidazole-protonated_D1_-35_D3_-45_D5_0 | 0.438 | 50.2 | 222.4 | 1.7 |
| Glucose-imidazole-protonated_D1_-35_D3_-55_D5_0 | 0.512 | 51.5 | 231.1 | 1.8 |
| Glucose-imidazole-protonated_D1_-40_D3_-30_D5_0 | 0.383 | 50.6 | 194.6 | 1.8 |
| Glucose-imidazole-protonated_D1_-45_D3_-55_D5_0 | 0.558 | 50.0 | 219.2 | 1.9 |
| Glucose-imidazole-protonated_D1_-60_D3_-40_D5_0 | 0.577 | 51.4 | 189.9 | 1.9 |
| Glucose-imidazole-protonated_D1_-35_D3_-40_D5_0 | 0.404 | 49.7 | 216.1 | 1.9 |
| Glucose-imidazole-protonated_D1_-60_D3_-20_D5_0 | 0.532 | 57.8 | 167.5 | 1.9 |
| Glucose-imidazole-protonated_D1_-55_D3_-25_D5_0 | 0.492 | 55.0 | 175.2 | 2.0 |
| Glucose-imidazole-protonated_D1_-45_D3_-20_D5_0 | 0.397 | 55.3 | 174.4 | 2.0 |
| Glucose-imidazole-protonated_D1_-35_D3_-50_D5_0 | 0.474 | 50.8 | 227.1 | 2.1 |
| Glucose-imidazole-protonated_D1_-35_D3_-20_D5_0 | 0.314 | 52.8 | 182.9 | 2.1 |
| Glucose-imidazole-protonated_D1_-30_D3_-50_D5_0 | 0.456 | 52.1 | 234.1 | 2.3 |
| Glucose-imidazole-protonated_D1_-55_D3_-50_D5_0 | 0.589 | 49.8 | 204.3 | 2.3 |
| Glucose-imidazole-protonated_D1_-30_D3_-45_D5_0 | 0.417 | 51.2 | 229.7 | 2.4 |
| Glucose-imidazole-protonated_D1_-25_D3_-45_D5_0 | 0.402 | 52.8 | 237.4 | 2.4 |
| Glucose-imidazole-protonated_D1_-35_D3_-35_D5_0 | 0.374 | 49.5 | 209.3 | 2.4 |
| Glucose-imidazole-protonated_D1_-40_D3_-25_D5_0 | 0.366 | 52.0 | 186.4 | 2.4 |
| Glucose-imidazole-protonated_D1_-25_D3_-50_D5_0 | 0.443 | 53.8 | 241.1 | 2.5 |
| Glucose-imidazole-protonated_D1_-35_D3_-30_D5_0 | 0.349 | 49.9 | 201.1 | 2.5 |
| Glucose-imidazole-protonated_D1_-50_D3_-55_D5_0 | 0.587 | 49.7 | 213.8 | 2.5 |

### NMR calculations

Based on the optimized structures the spin-spin coupling constants were calculated according to the work of Rablen and Bally<sup>[26]</sup> with the use of 6-311g(d,p) u+1s as basis set and PCM(H<sub>2</sub>O) as solvent model. The calculated total nuclear spin-spin coupling terms were used as calculated spin-spin coupling constants. The calculated  ${}^3J_{(H,H)}$  coupling constants for these low energy  ${}^4H_3$  rotamers of **6** matched well with experimental  ${}^3J_{(H,H)}$  coupling constants, suggesting that that **6** most likely adopts a  ${}^4H_3$  conformation in solution.

### Gluco-1*H*-imidazole

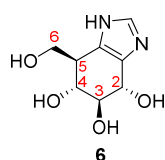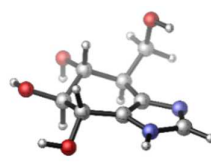

*gg* (0.0 kcal/mol)

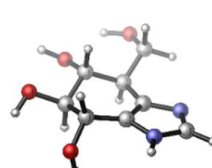

*gt* (+0.1 kcal/mol)

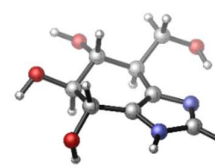

*tg* (+0.3 kcal/mol)

| H-H Coupling | Exp. ${}^3J_{(H,H)}$ (Hz) | DFT calculated ${}^3J_{(H,H)}$ (Hz) | DFT calculated ${}^3J_{(H,H)}$ (Hz) | DFT calculated ${}^3J_{(H,H)}$ (Hz) |
|--------------|---------------------------|-------------------------------------|-------------------------------------|-------------------------------------|
| H2-H3        | 7.6                       | 7.1                                 | 7.3                                 | 7.2                                 |
| H3-H4        | 9.8                       | 10.1                                | 9.5                                 | 9.8                                 |
| H4-H5        | 9.4                       | 9.5                                 | 9.5                                 | 9.2                                 |
| H5-H6a       | 2.8                       | 2.5                                 | 4.5                                 | 10.0                                |
| H5-H6b       | 4.8                       | 2.6                                 | 10.7                                | 3.2                                 |
| H6a-H6b      | 11.4                      | 12.8                                | 11.1                                | 11.9                                |

### Gluco-1*H*-imidazole (protonated)

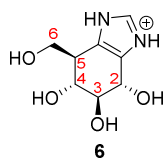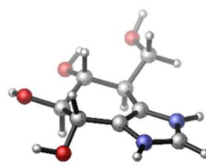

*gg* (0.0 kcal/mol)

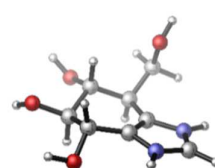

*gg* (+0.0 kcal/mol)

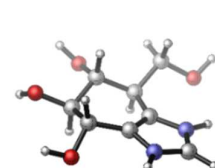

*tg* (+2.3 kcal/mol)

| H-H Coupling | Exp. ${}^3J_{(H,H)}$ (Hz) | DFT calculated ${}^3J_{(H,H)}$ (Hz) | DFT calculated ${}^3J_{(H,H)}$ (Hz) | DFT calculated ${}^3J_{(H,H)}$ (Hz) |
|--------------|---------------------------|-------------------------------------|-------------------------------------|-------------------------------------|
| H2-H3        | 7.6                       | 8.0                                 | 8.0                                 | 7.9                                 |
| H3-H4        | 9.8                       | 9.9                                 | 10.2                                | 10.0                                |
| H4-H5        | 9.4                       | 10.0                                | 9.8                                 | 7.8                                 |
| H5-H6a       | 2.8                       | 4.9                                 | 3.2                                 | 12.5                                |
| H5-H6b       | 4.8                       | 11.7                                | 2.2                                 | 4.8                                 |
| H6a-H6b      | 11.4                      | 8.8                                 | 10.4                                | 8.8                                 |

## References

- [1] T. Granier, N. Panday, A. Vasella, *Helv. Chim. Acta* **1997**, *80*, 979–987.
- [2] D. Keirs, K. Overton, *J. Chem. Soc. Chem. Commun.* **1987**, 1660–1661.
- [3] G. M. Dubowchik, L. Padilla, K. Edinger, R. a. Firestone, *J. Org. Chem.* **1996**, *61*, 4676–4684.
- [4] M. Frigerio, M. Santagostino, S. Sputore, *J. Org. Chem.* **1999**, *64*, 4537–4538.
- [5] T. J. M. Beenakker, D. P. A. Wander, W. A. Offen, M. Artola, L. Raich, M. J. Ferraz, K. Y. Li, J. H. P. M. Houben, E. R. van Rijssel, T. Hansen, G. A. van der Marel, J. D. C. Codée, J. M. F. G. Aerts, C. Rovira, G. J. Davies, H. S. Overkleeft, *J. Am. Chem. Soc.* **2017**, *139*, 6534–6537.
- [6] M. Artola, L. Wu, M. J. Ferraz, C. L. Kuo, L. Raich, I. Z. Breen, W. A. Offen, J. D. C. Codée, G. A. van der Marel, C. Rovira, J. M. F. G. Aerts, G. J. Davies, H. S. Overkleeft, *ACS Cent. Sci.* **2017**, *3*, 784–793.
- [7] A. Trapero, A. Llebaria, *ACS Med. Chem. Lett.* **2011**, *2*, 614–619.
- [8] A. D. Gift, S. M. Stewart, P. K. Bokashanga, *J. Chem. Educ.* **2012**, *89*, 1458–1460.
- [9] A. Krezel, W. Bal, *J. Inorg. Biochem.* **2004**, *98*, 161–166.
- [10] T. M. Gloster, P. Meloncelli, R. V. Stick, D. Zechel, A. Vasella, G. J. Davies, *J. Am. Chem. Soc.* **2007**, *129*, 2345–2354.
- [11] R. Charoenwattanasatien, S. Pengthaisong, I. Breen, R. Mutoh, S. Sansenya, Y. Hua, A. Tankrathok, L. Wu, C. Songsiriritthigul, H. Tanaka, S. J. Williams, G. J. Davies, G. Kurisu, J. R. K. Cairns, *ACS Chem. Biol.* **2016**, *11*, 1891–1900.
- [12] D. Lahav, B. Liu, R. J. B. H. N. van den Berg, A. M. C. H. van den Nieuwendijk, T. Wennekes, A. T. Ghisaidoobe, I. Breen, M. J. Ferraz, C. L. Kuo, L. Wu, P. P. Geurink, H. Ovaa, G. A. van der Marel, M. van der Stelt, R. G. Boot, G. J. Davies, J. M. F. G. Aerts, H. S. Overkleeft, *J. Am. Chem. Soc.* **2017**, *139*, 14192–14197.
- [13] H. M. Chen, S. G. Withers, *ChemBioChem* **2007**, *8*, 719–722.
- [14] S. K. Sharma, G. Corrales, S. Penadés, *Tetrahedron Lett.* **1995**, *36*, 5627–5630.
- [15] T. Wennekes, R. J. B. H. N. van den Berg, W. Donker, G. A. van der Marel, A. Strijland, J. M. F. G. Aerts, H. S. Overkleeft, *J. Org. Chem.* **2007**, *72*, 1088–1097.
- [16] E. G. Bligh, W. J. Dyer, *Can. J. Biochem. Physiol.* **1959**, *37*, 911–917.
- [17] D. L. Zechel, A. B. Boraston, T. Gloster, C. M. Boraston, J. M. Macdonald, D. M. G. Tilbrook, R. V. Stick, G. J. Davies, *J. Am. Chem. Soc.* **2003**, *125*, 14313–14323.
- [18] D. G. Waterman, G. Winter, R. J. Gildea, J. M. Parkhurst, A. S. Brewster, N. K. Sauter, G. Evans, *Acta Crystallogr. Sect. D, Struct. Biol.* **2016**, *72*, 558–575.
- [19] P. R. Evans, G. N. Murshudov, *Acta Crystallogr. Sect. D Biol. Crystallogr.* **2013**, *69*, 1204–1214.
- [20] A. A. Vagin, R. A. Steiner, A. A. Lebedev, L. Potterton, S. McNicholas, F. Long, G. N. Murshudov, *Acta Crystallogr. Sect. D Biol. Crystallogr.* **2004**, *60*, 2184–2195.
- [21] P. Emsley, B. Lohkamp, W. G. Scott, K. Cowtan, *Acta Crystallogr. Sect. D Biol. Crystallogr.* **2010**, *66*, 486–501.
- [22] R. Charoenwattanasatien, S. Pengthaisong, I. Breen, R. Mutoh, S. Sansenya, Y. Hua, A. Tankrathok, L. Wu, C. Songsiriritthigul, H. Tanaka, S. J. Williams, G. J. Davies, G. Kurisu, J. R. K. Cairns, *ACS Chem. Biol.* **2016**, *11*, 1891–1900.
- [23] A. Vagin, A. Teplyakov, *J. Appl. Crystallogr.* **1997**, *30*, 1022–1025.
- [24] J. Kong, C. A. White, A. I. Krylov, D. Sherrill, R. D. Adamson, T. R. Furlani, M. S. Lee, A. M. Lee, S. R. Gwaltney, T. R. Adams, C. Ochsenfeld, A. T. B. Gilbert, G. S. Kedziora, V. A. Rassolov, D. R. Maurice, N. Nair, Y. Shao, N. A. Besley, P. E. Maslen, J. P. Dombroski, H. Daschel, W. Zhang, P. P. Korambath, J. Baker, E. F. C. Byrd, T. Van Voorhis, M. Oumi, S. Hirata, C. Hsu, N. Ishikawa, J.

- Florian, A. Warshel, B. G. Johnson, P. M. W. Gill, M. Head-Gordon, J. A. Pople, *J. Comput. Chem.* **2000**, *21*, 1532–1548.
- [25] C. Y. Legault, *CYLview, 1.0b*, Univ. Sherbrooke, 2009 (<http://www.cylview.org>).
- [26] T. Bally, P. R. Rablen, *J. Org. Chem.* **2011**, *76*, 4818–4830.
